# Supplementary material for: Dynamic changes in DNA populations revealed by split–combine selection
Source: Royal Society of Chemistry journal article supplement (doi:10.1039/d0sc01952f), 2020-01-01
Supplement: d0sc01952f3.xlsx [file d0sc01952f3.xlsx]

## Sheet: Split-combine SL, C4, C6, C8
			Copy number				Frequency [%]
Clickmer	No	SEQUENCE (RANDOM REGION)	SL	C4	C6	C8	SL	C4	C6	C8
I10	1	CGCGTAGGTACCCGGCTTTGAATATGTAGGGGACCTAGAGAACA	24	1320806	676134	453894	0.0004	22.9139	33.6378	32.8109
	2	CCGCCCGCGTATGATGCCGTCTTACGGGCAGCCGCAACCACAAC	12	336397	191083	192519	0.0002	5.836	9.5064	13.9167
F20	3	CCGCCCGCGTATGATGCCGTCTTACGGGCAGCCGTAACCACAAC	10	320987	164275	190945	0.0002	5.5686	8.1727	13.8029
	4	CCGCCCGCGTATGATGCCGTCTTACGGGCAGCCACAACCACAAC	2	39014	26728	26760	0	0.6768	1.3297	1.9344
	5	CGCATAGGTACCCGGCTTTGAATATGTAGGGGACCTAGAGAACA	0	34277	17961	13547	0	0.5947	0.8936	0.9793
	6	CCGCCCGCGTATGGTGCCGTCTTACGGGCAGCCGTAACCACAAC	0	9741	5638	12162	0	0.169	0.2805	0.8792
	7	AGCACCATAACGTGGCGTCGGCGACCTCACTCCTCCATGCCCCA	4	291754	52122	11824	0.0001	5.0615	2.5931	0.8547
	8	CGCGTAGGTACCCGGCTTTGAATATGTAGGGGACCTAGAAAACA	1	21756	13226	11794	0	0.3774	0.658	0.8526
	9	CCGCCCGCGTATGATGCCGTCTTACGGACAGCCGCAACCACAAC	1	37357	15478	8606	0	0.6481	0.77	0.6221
	10	CCGCCCGCGTATGATGCCGTCTTACGGGCAGTCGTAACCACAAC	0	12653	6833	7542	0	0.2195	0.3399	0.5452
	11	CGCGTAGGTACCCGGCTTTGAATATGTAGGGGACCTAAAGAACA	0	14674	8921	7396	0	0.2546	0.4438	0.5346
	12	CGCGTAGGTACCCGGCTTTGGATATGTAGGGGACCTAGAGAACA	0	5754	5272	7326	0	0.0998	0.2623	0.5296
	13	CCGCCCGCGTATGATGCCGTCTTACGGGCAGCCATAACCACAAC	1	13794	7212	7186	0	0.2393	0.3588	0.5195
	14	CGCGTAGGTACCCGGCTTTGAATATGTAGGGAACCTAGAGAACA	2	30180	13157	7056	0	0.5236	0.6546	0.5101
	15	CGCGTAGGTACCCGGCTTTGAATATGTAGGGGACCTAGATAACA	1	8191	6739	6849	0	0.1421	0.3353	0.4951
	16	CGCGTAGGTACCCGGCTTTGAATATGTAGGGGACCTATAGAACA	1	8488	7109	6124	0	0.1473	0.3537	0.4427
	17	CGCGCAGGTACCCGGCTTTGAATATGTAGGGGACCTAGAGAACA	0	7540	6329	5863	0	0.1308	0.3149	0.4238
	18	AGCACCATAACGTGACGTCGGCGACCTCACTCCTCCATGCCCCA	7	312703	13008	5520	0.0001	5.4249	0.6472	0.399
	19	CTGGGGGTATGGTGCCGTCTTACCCATAGGCGGATCTCAGACGA	0	20963	21751	5060	0	0.3637	1.0821	0.3658
	20	CGCGTAGATACCCGGCTTTGAATATGTAGGGGACCTAGAGAACA	1	19316	9189	5026	0	0.3351	0.4572	0.3633
	21	CGCGTAGGTACCCGGCTTTGAATATGTAGGGGACCTAGAGAATA	0	8344	5025	4713	0	0.1448	0.25	0.3407
	22	CGCGTAGGTACCCGGTTTTGAATATGTAGGGGACCTAGAGAACA	0	23274	6812	4506	0	0.4038	0.3389	0.3257
	23	CGCGTAGGTACCCGGCTTTGAATATGTAGGGGACCCAGAGAACA	0	10106	5950	4504	0	0.1753	0.296	0.3256
	24	CGCGTAGGTACCCGACTTTGAATATGTAGGGGACCTAGAGAACA	0	23889	6359	4397	0	0.4144	0.3164	0.3178
	25	AGATCGGGCCGGAGCGAGGTATGATGCCATCCTTCACAGCTCCA	2	274422	81135	4372	0	4.7608	4.0365	0.316
	26	CGTGTAGGTACCCGGCTTTGAATATGTAGGGGACCTAGAGAACA	0	5862	4222	4226	0	0.1017	0.21	0.3055
	27	CCGCCCGCGTATGATGCCGTCTTACGGACAGCCGTAACCACAAC	0	19389	7465	4099	0	0.3364	0.3714	0.2963
	28	TCGGGCCGGAGCGAGGTATGATGCCATCCTTCACAGCTCCAGCA	13	259409	77775	3913	0.0002	4.5003	3.8693	0.2829
	29	CCGCCCGCGTATGATGCCGTCTTACGGGCAACCGCAACCACAAC	0	20374	8095	3873	0	0.3535	0.4027	0.28
	30	CGCGTAAGTACCCGGCTTTGAATATGTAGGGGACCTAGAGAACA	1	10104	6294	3849	0	0.1753	0.3131	0.2782
	31	CCGCCCGCGTATGATGTCGTCTTACGGGCAGCCGTAACCACAAC	0	11790	3318	3751	0	0.2045	0.1651	0.2712
	32	CCGCCCGCGTATGATGTCGTCTTACGGGCAGCCGCAACCACAAC	1	11476	4209	3741	0	0.1991	0.2094	0.2704
	33	CCGCCCGCGTATGATGCCGTCTTACGGGCAGCCGCAACCACAAT	0	4712	2972	3445	0	0.0817	0.1479	0.249
	34	CGCGTAGGTACCCGGCTTTGAATATGTAGGGGACTTAGAGAACA	0	11640	5878	3440	0	0.2019	0.2924	0.2487
	35	CTCGTAGGTACCCGGCTTTGAATATGTAGGGGACCTAGAGAACA	0	4602	3092	3148	0	0.0798	0.1538	0.2276
	36	CGCGTAGGCACCCGGCTTTGAATATGTAGGGGACCTAGAGAACA	0	9404	5371	3136	0	0.1631	0.2672	0.2267
	37	CCGCCCGCGTATGATGCCGTCTTACGGGCAGCCGCAATCACAAC	0	4500	2947	3112	0	0.0781	0.1466	0.225
	38	CGCGTAGGTGCCCGGCTTTGAATATGTAGGGGACCTAGAGAACA	1	8470	4192	2988	0	0.1469	0.2086	0.216
	39	CGCGTAGGTACCCGGCTTTAAATATGTAGGGGACCTAGAGAACA	0	7454	4134	2925	0	0.1293	0.2057	0.2114
	40	CGCGTGGGTACCCGGCTTTGAATATGTAGGGGACCTAGAGAACA	0	7989	4445	2912	0	0.1386	0.2211	0.2105
	41	CCGCCCGCGTATGATGCCGTCTTACGGGCAACCGTAACCACAAC	0	9750	2741	2787	0	0.1691	0.1364	0.2015
	42	CCGCCCGCGTATGATGCCGTCTTACGAGCAGCCGTAACCACAAC	0	7938	3406	2667	0	0.1377	0.1694	0.1928
	43	CGCTTAGGTACCCGGCTTTGAATATGTAGGGGACCTAGAGAACA	0	4743	2909	2566	0	0.0823	0.1447	0.1855
	44	CCGCCCGCGTATGATGCCGTCTTACGGGCAGCCTCAACCACAAC	1	2599	2148	2492	0	0.0451	0.1069	0.1801
	45	CCGCCCGCGTATGATGCCGTCTTACGGGCAGCCGTAACCACAAT	0	4985	2026	2436	0	0.0865	0.1008	0.1761
	46	CCGCCCGCGTATGATGCCGTCTTACGGGCAGCCGCAACCATAAC	0	5740	2672	2369	0	0.0996	0.1329	0.1712
	47	CGCGTAGGTACCCGGCTTTGAATATGTAGGGGGCCTAGAGAACA	0	5956	3807	2328	0	0.1033	0.1894	0.1683
	48	CCGCCCGCGTATGATGCCGTCTTACGGGCAGCTGCAACCACAAC	0	5675	3367	2254	0	0.0985	0.1675	0.1629
	49	CCGCCCGCGTATGATGCCGTCTTACGGGCAGCCGTGACCACAAC	0	2224	1902	2213	0	0.0386	0.0946	0.16
	50	CGCGTAGGTACTCGGCTTTGAATATGTAGGGGACCTAGAGAACA	1	8268	3351	2095	0	0.1434	0.1667	0.1514
	51	CCGCCCGCGTATGGTGCCGTCTTACGGGCAGCCGCAACCACAAC	1	4099	1470	2067	0	0.0711	0.0731	0.1494
	52	CGCGTAGGTACCCGGCTTTGAATATGTAGGGGACATAGAGAACA	0	6676	3503	2016	0	0.1158	0.1743	0.1457
	53	CCGCCCGCGTATGATGCCGTCTTACGGGCAGTCACAACCACAAC	0	2919	1953	1966	0	0.0506	0.0972	0.1421
	54	CCGCCCGCGTATGATGCCGTCTTACGGTCAGCCGCAACCACAAC	1	3063	1935	1926	0	0.0531	0.0963	0.1392
	55	CCGCCCGCGTATGATGCCGTCTTACGAGCAGCCGCAACCACAAC	1	6667	2483	1881	0	0.1157	0.1235	0.136
	56	AGCACCATAACGTGGCGTCGGCGACCTAACTCCTCCATGCCCCA	1	15358	9615	1861	0	0.2664	0.4783	0.1345
	57	GGGAGCTTATGAGGCACGGGGTATAGTCACGTCTTACCGCACCA	1	18021	400	1843	0	0.3126	0.0199	0.1332
	58	CCGCCCGCGTATGATGCCGTCTTGCGGGCAGCCGTAACCACAAC	0	5154	3014	1838	0	0.0894	0.1499	0.1329
	59	AACACCATAACGTGGCGTCGGCGACCTCACTCCTCCATGCCCCA	0	27943	4855	1820	0	0.4848	0.2415	0.1316
	60	CCGCCCGCGTATGATGCCGTCTTACGGGCAGCTGTAACCACAAC	0	5384	2312	1814	0	0.0934	0.115	0.1311
	61	CCGCCCGCGTATGATGCCGTCTTACGGGCAGCCGTAATCACAAC	1	2916	1622	1721	0	0.0506	0.0807	0.1244
	62	CGCGTAGGTACCCGGCTTTGAATATATAGGGGACCTAGAGAACA	0	9901	2606	1634	0	0.1718	0.1296	0.1181
	63	TGCGTAGGTACCCGGCTTTGAATATGTAGGGGACCTAGAGAACA	0	4622	2256	1630	0	0.0802	0.1122	0.1178
	64	CTGCCCGCGTATGATGCCGTCTTACGGGCAGCCGCAACCACAAC	0	2485	1509	1604	0	0.0431	0.0751	0.1159
	65	CCGCCCGCGTATGATGCCGTCTTACGGGCAGCCGCAACTACAAC	0	2443	1371	1601	0	0.0424	0.0682	0.1157
	66	CGCGTAGGTATCCGGCTTTGAATATGTAGGGGACCTAGAGAACA	0	6477	2298	1472	0	0.1124	0.1143	0.1064
	67	CCGCCCGCGTATAATGCCGTCTTACGGGCAGCCGTAACCACAAC	0	6671	2532	1452	0	0.1157	0.126	0.105
	68	CCGCCCGCGTATGATGCCGTCTTGCGGGCAGCCGCAACCACAAC	0	5473	2644	1439	0	0.0949	0.1315	0.104
	69	CCGCCCGCATATGATGCCGTCTTACGGGCAGCCGCAACCACAAC	0	4277	1376	1422	0	0.0742	0.0685	0.1028
	70	CCGCCCGCGTATAATGCCGTCTTACGGGCAGCCGCAACCACAAC	0	6847	2435	1353	0	0.1188	0.1211	0.0978
	71	CGCGTAGGTACCCGGCTTTGAATATGTAGGGGACCTGGAGAACA	0	3184	1869	1348	0	0.0552	0.093	0.0974
	72	CGCGTATGTACCCGGCTTTGAATATGTAGGGGACCTAGAGAACA	0	4677	2394	1334	0	0.0811	0.1191	0.0964
	73	AACACCATAACGTGACGTCGGCGACCTCACTCCTCCATGCCCCA	0	38533	1322	1217	0	0.6685	0.0658	0.088
	74	CGCGTAGGTACCCGGCTTTGAATATGTAGGGGATCTAGAGAACA	0	6808	2656	1187	0	0.1181	0.1321	0.0858
	75	AGTACCATAACGTGGCGTCGGCGACCTCACTCCTCCATGCCCCA	1	14173	2254	1102	0	0.2459	0.1121	0.0797
	76	CCGCCCGCGTATGATGCCATCTTACGGGCAGCCGCAACCACAAC	0	7967	2579	1071	0	0.1382	0.1283	0.0774
	77	CGCGTAGGTACCCGGCTTTGAATATGTATGGGACCTAGAGAACA	0	4095	1639	1053	0	0.071	0.0815	0.0761
	78	CCGCCCGCGTATGATGCCATCTTACGGGCAGCCGTAACCACAAC	0	7450	2340	1039	0	0.1292	0.1164	0.0751
	79	CGCGTAGGTACCCGGCTTTGAATATGTAGGAGACCTAGAGAACA	0	4198	1569	932	0	0.0728	0.0781	0.0674
	80	CCGCCCGCGTATGATACCGTCTTACGGGCAGCCGTAACCACAAC	0	5993	1444	866	0	0.104	0.0718	0.0626
	81	CCGCCCGCGTATGATGCCGTCTTACGGGCAACCACAACCACAAC	0	3378	1642	854	0	0.0586	0.0817	0.0617
	82	CCGCCCGCGTATGATACCGTCTTACGGGCAGCCGCAACCACAAC	0	5641	1433	852	0	0.0979	0.0713	0.0616
	83	CCGCCCGCGTATGATGCCGTCTTACGGACAGCCACAACCACAAC	1	5826	1858	824	0	0.1011	0.0924	0.0596
	84	AGCACCATAACGTGACGTCGGCGACCTAACTCCTCCATGCCCCA	0	23918	3959	791	0	0.4149	0.197	0.0572
	85	AGATCGGGCCGGAGCGAGGTATAATGCCATCCTTCACAGCTCCA	0	16125	6522	609	0	0.2797	0.3245	0.044
	86	TCGGGCCGGAGCGAGGTATAATGCCATCCTTCACAGCTCCAGCA	0	14636	6248	583	0	0.2539	0.3108	0.0421
	87	CGCCGGACGTATAATGCCATCTTGCCCGACTGCGACTAACACAA	5	21095	522	570	0.0001	0.366	0.026	0.0412
	88	AGCACCATAACGTGGCGTCGGCGCCCTCACTCCTCCATGCCCCA	0	10395	1473	406	0	0.1803	0.0733	0.0293
	89	TCGGGCCGGAGCAAGGTATGATGCCATCCTTCACAGCTCCAGCA	0	10265	2713	226	0	0.1781	0.135	0.0163
	90	AGATTGGGCCGGAGCGAGGTATGATGCCATCCTTCACAGCTCCA	0	10418	2548	194	0	0.1807	0.1268	0.014
	91	AGATCGGGCCGGAGCAAGGTATGATGCCATCCTTCACAGCTCCA	0	9784	2425	191	0	0.1697	0.1206	0.0138
	92	AGATCGGACCGGAGCGAGGTATGATGCCATCCTTCACAGCTCCA	0	10693	2806	154	0	0.1855	0.1396	0.0111
	93	AGATCGGGCCGGAGCGAGGTATGATGCCATCCTTCACAGCCCCA	0	11049	2822	150	0	0.1917	0.1404	0.0108
	94	TTGGGCCGGAGCGAGGTATGATGCCATCCTTCACAGCTCCAGCA	0	8891	2156	150	0	0.1542	0.1073	0.0108
	95	TCGGACCGGAGCGAGGTATGATGCCATCCTTCACAGCTCCAGCA	0	10347	2880	110	0	0.1795	0.1433	0.008
	96	TCGGGCCGGAGCGAGGTATGATGCCATCCTTCACAGCCCCAGCA	0	9077	2307	102	0	0.1575	0.1148	0.0074
	97	AGATCGGGTCGGAGCGAGGTATGATGCCATCCTTCACAGCTCCA	0	9892	2146	90	0	0.1716	0.1068	0.0065
	98	AGATCGGGCCGGAGCGAGGTATGATGCCATTCTTCACAGCTCCA	0	10386	1970	89	0	0.1802	0.098	0.0064
	99	AGATCGGGCCGGAGCGAGGTATGATGCCATCCTTCACAACTCCA	0	7222	1456	85	0	0.1253	0.0724	0.0061
	100	TCGGGTCGGAGCGAGGTATGATGCCATCCTTCACAGCTCCAGCA	1	8341	1830	70	0	0.1447	0.091	0.0051
	101	TCGGGCCGGAGCGAGGTATGATGCCATTCTTCACAGCTCCAGCA	0	9226	1782	69	0	0.1601	0.0887	0.005
	102	TCGGGCCGGAGCGAGGTATGATGTCATCCTTCACAGCTCCAGCA	0	7264	1353	69	0	0.126	0.0673	0.005

## Sheet: In-dU C9
			Copy number					Frequency [%]
Clickmer	No	SEQUENCE (RANDOM REGION)	SL	C4	C6	C8	C9	SL	C4	C6	C8	C9
I10	1	CGCGTAGGTACCCGGCTTTGAATATGTAGGGGACCTAGAGAACA	24	1320806	676134	453894	413468	0.0004	22.9139	33.6378	32.8109	64.3328
	2	CGCATAGGTACCCGGCTTTGAATATGTAGGGGACCTAGAGAACA	0	34277	17961	13547	16706	0	0.5947	0.8936	0.9793	2.5993
	3	CGCGTAGGTACCCGGCTTTGAATATGTAGGGGACCTAGAAAACA	1	21756	13226	11794	11670	0	0.3774	0.658	0.8526	1.8158
	4	CGCGTAGGTACCCGGCTTTGGATATGTAGGGGACCTAGAGAACA	0	5754	5272	7326	9610	0	0.0998	0.2623	0.5296	1.4952
	5	CGCGTAGGTACCCGGCTTTGAATATGTAGGGAACCTAGAGAACA	2	30180	13157	7056	8499	0	0.5236	0.6546	0.5101	1.3224
	6	CGCGTAGGTACCCGGCTTTGAATATGTAGGGGACCTAAAGAACA	0	14674	8921	7396	7938	0	0.2546	0.4438	0.5346	1.2351
	7	CGCGCAGGTACCCGGCTTTGAATATGTAGGGGACCTAGAGAACA	0	7540	6329	5863	7328	0	0.1308	0.3149	0.4238	1.1402
	8	CGCGTAGGTACCCGGCTTTGAATATGTAGGGGACCTATAGAACA	1	8488	7109	6124	6778	0	0.1473	0.3537	0.4427	1.0546
	9	CGCGTAGGTACCCGGCTTTGAATATGTAGGGGACCTAGATAACA	1	8191	6739	6849	6323	0	0.1421	0.3353	0.4951	0.9838
	10	CGCGTAGATACCCGGCTTTGAATATGTAGGGGACCTAGAGAACA	1	19316	9189	5026	5116	0	0.3351	0.4572	0.3633	0.796
	11	CGCGTAAGTACCCGGCTTTGAATATGTAGGGGACCTAGAGAACA	1	10104	6294	3849	4942	0	0.1753	0.3131	0.2782	0.7689
	12	CGCGTAGGTACCCGGCTTTGAATATGTAGGGGACCCAGAGAACA	0	10106	5950	4504	4839	0	0.1753	0.296	0.3256	0.7529
	13	CGCGTAGGTACCCGGCTTTGAATATGTAGGGGACCTAGAGAATA	0	8344	5025	4713	4833	0	0.1448	0.25	0.3407	0.752
	14	CGCGTAGGTACCCGGCTTTGAATATGTAGGGGACTTAGAGAACA	0	11640	5878	3440	4104	0	0.2019	0.2924	0.2487	0.6386
	15	CGTGTAGGTACCCGGCTTTGAATATGTAGGGGACCTAGAGAACA	0	5862	4222	4226	4073	0	0.1017	0.21	0.3055	0.6337
	16	CGCGTAGGTGCCCGGCTTTGAATATGTAGGGGACCTAGAGAACA	1	8470	4192	2988	3541	0	0.1469	0.2086	0.216	0.551
	17	CGCGTAGGTACCCGGTTTTGAATATGTAGGGGACCTAGAGAACA	0	23274	6812	4506	3487	0	0.4038	0.3389	0.3257	0.5426
	18	CGCGTAGGCACCCGGCTTTGAATATGTAGGGGACCTAGAGAACA	0	9404	5371	3136	3383	0	0.1631	0.2672	0.2267	0.5264
	19	CGCGTAGGTACCCGACTTTGAATATGTAGGGGACCTAGAGAACA	0	23889	6359	4397	3331	0	0.4144	0.3164	0.3178	0.5183
	20	CGCGTGGGTACCCGGCTTTGAATATGTAGGGGACCTAGAGAACA	0	7989	4445	2912	3260	0	0.1386	0.2211	0.2105	0.5072
	21	CGCGTAGGTACCCGGCTTTAAATATGTAGGGGACCTAGAGAACA	0	7454	4134	2925	2849	0	0.1293	0.2057	0.2114	0.4433
	22	CGCGTAGGTACCCGGCTTTGAATATGTAGGGGGCCTAGAGAACA	0	5956	3807	2328	2822	0	0.1033	0.1894	0.1683	0.4391
	23	CTCGTAGGTACCCGGCTTTGAATATGTAGGGGACCTAGAGAACA	0	4602	3092	3148	2375	0	0.0798	0.1538	0.2276	0.3695
	24	CGCTTAGGTACCCGGCTTTGAATATGTAGGGGACCTAGAGAACA	0	4743	2909	2566	2277	0	0.0823	0.1447	0.1855	0.3543
	25	CGCGTAGGTACCCGGCTTTGAATATATAGGGGACCTAGAGAACA	0	9901	2606	1634	2174	0	0.1718	0.1296	0.1181	0.3383
	26	CGCGTAGGTACCCGGCTTTGAATATGTAGGGGACATAGAGAACA	0	6676	3503	2016	2099	0	0.1158	0.1743	0.1457	0.3266
	27	CGCGTAGGTACCCGGCTTTGAATATGTAGGGGACCTGGAGAACA	0	3184	1869	1348	1827	0	0.0552	0.093	0.0974	0.2843
	28	CGCGTAGGTACTCGGCTTTGAATATGTAGGGGACCTAGAGAACA	1	8268	3351	2095	1513	0	0.1434	0.1667	0.1514	0.2354
	29	CGCGTAGGTACCCGGCTTTGAATATGTAGGGGATCTAGAGAACA	0	6808	2656	1187	1405	0	0.1181	0.1321	0.0858	0.2186
	30	TGCGTAGGTACCCGGCTTTGAATATGTAGGGGACCTAGAGAACA	0	4622	2256	1630	1322	0	0.0802	0.1122	0.1178	0.2057
	31	CGCGTTGGTACCCGGCTTTGAATATGTAGGGGACCTAGAGAACA	0	1757	1186	1050	1312	0	0.0305	0.059	0.0759	0.2041
	32	CGCGTATGTACCCGGCTTTGAATATGTAGGGGACCTAGAGAACA	0	4677	2394	1334	1308	0	0.0811	0.1191	0.0964	0.2035
	33	CGCGTAGGTATCCGGCTTTGAATATGTAGGGGACCTAGAGAACA	0	6477	2298	1472	1233	0	0.1124	0.1143	0.1064	0.1918
	34	CGCGTAGGTACCCGGCTTTGAATATGTAGGGGACCTTGAGAACA	0	1513	1044	897	1055	0	0.0262	0.0519	0.0648	0.1642
	35	CGCGTAGGTACCCGGCTTTGAATATGTAGGAGACCTAGAGAACA	0	4198	1569	932	961	0	0.0728	0.0781	0.0674	0.1495
	36	CGCGTAGGTACCCGGCTTTGAATATGTATGGGACCTAGAGAACA	0	4095	1639	1053	676	0	0.071	0.0815	0.0761	0.1052
	37	CGCGTAGGTACCCGGCTTTGAATATTTAGGGGACCTAGAGAACA	0	1524	1006	1091	555	0	0.0264	0.05	0.0789	0.0864
F20	38	CCGCCCGCGTATGATGCCGTCTTACGGGCAGCCGTAACCACAAC	10	320987	164275	190945	334	0.0002	5.5686	8.1727	13.8029	0.052
	39	CCGCCCGCGTATGATGCCGTCTTACGGGCAGCCGCAACCACAAC	12	336397	191083	192519	322	0.0002	5.836	9.5064	13.9167	0.0501
	40	CCGCCCGCGTATGATGCCGTCTTACGGGCAGCCACAACCACAAC	2	39014	26728	26760	71	0	0.6768	1.3297	1.9344	0.011
C1	41	AGCACCATAACGTGGCGTCGGCGACCTCACTCCTCCATGCCCCA	4	291754	52122	11824	42	0.0001	5.0615	2.5931	0.8547	0.0065
	42	CCGCCCGCGTATGATGCCGTCTTACGGACAGCCGCAACCACAAC	1	37357	15478	8606	30	0	0.6481	0.77	0.6221	0.0047
	43	AGCACCATAACGTGACGTCGGCGACCTCACTCCTCCATGCCCCA	7	312703	13008	5520	26	0.0001	5.4249	0.6472	0.399	0.004
	44	CCGCCCGCGTATGGTGCCGTCTTACGGGCAGCCGTAACCACAAC	0	9741	5638	12162	24	0	0.169	0.2805	0.8792	0.0037
	45	CCGCCCGCGTATGATGCCGTCTTACGGGCAGTCGTAACCACAAC	0	12653	6833	7542	20	0	0.2195	0.3399	0.5452	0.0031
	46	CCGCCCGCGTATGATGCCGTCTTACGGGCAGCCATAACCACAAC	1	13794	7212	7186	17	0	0.2393	0.3588	0.5195	0.0026
	47	CCGCCCGCGTATGATGCCGTCTTACGGGCAACCGTAACCACAAC	0	9750	2741	2787	15	0	0.1691	0.1364	0.2015	0.0023
	48	CCGCCCGCGTATGATGCCGTCTTACGAGCAGCCGCAACCACAAC	1	6667	2483	1881	12	0	0.1157	0.1235	0.136	0.0019
	49	CCGCCCGCGTATGATGTCGTCTTACGGGCAGCCGTAACCACAAC	0	11790	3318	3751	12	0	0.2045	0.1651	0.2712	0.0019
	50	AACACCATAACGTGGCGTCGGCGACCTCACTCCTCCATGCCCCA	0	27943	4855	1820	10	0	0.4848	0.2415	0.1316	0.0016
	51	CCGCCCGCATATGATGCCGTCTTACGGGCAGCCGCAACCACAAC	0	4277	1376	1422	9	0	0.0742	0.0685	0.1028	0.0014
	52	CCGCCCGCGTATGATGCCGTCTTACGGACAGCCGTAACCACAAC	0	19389	7465	4099	9	0	0.3364	0.3714	0.2963	0.0014
	53	CCGCCCGCGTATGATGCCGTCTTACGGGCAACCGCAACCACAAC	0	20374	8095	3873	9	0	0.3535	0.4027	0.28	0.0014
	54	CCGCCCGCGTATAATGCCGTCTTACGGGCAGCCGTAACCACAAC	0	6671	2532	1452	8	0	0.1157	0.126	0.105	0.0012
	55	CCGCCCGCGTATGATGCCGTCTTACGAGCAGCCGTAACCACAAC	0	7938	3406	2667	8	0	0.1377	0.1694	0.1928	0.0012
	56	CCGCCCGCGTATGATGCCGTCTTACGGGCAGCCGCAATCACAAC	0	4500	2947	3112	8	0	0.0781	0.1466	0.225	0.0012
	57	CCGCCCGCGTATGATGTCGTCTTACGGGCAGCCGCAACCACAAC	1	11476	4209	3741	8	0	0.1991	0.2094	0.2704	0.0012
	58	CTGGGGGTATGGTGCCGTCTTACCCATAGGCGGATCTCAGACGA	0	20963	21751	5060	8	0	0.3637	1.0821	0.3658	0.0012
	59	CCGCCCGCGTATAATGCCGTCTTACGGGCAGCCGCAACCACAAC	0	6847	2435	1353	7	0	0.1188	0.1211	0.0978	0.0011
	60	CCGCCCGCGTATGATGCCGTCTTACGGGCAACCACAACCACAAC	0	3378	1642	854	7	0	0.0586	0.0817	0.0617	0.0011
	61	CCGCCCGCGTATGATGCCGTCTTACGGGCAGCTGTAACCACAAC	0	5384	2312	1814	7	0	0.0934	0.115	0.1311	0.0011
	62	TCGGGCCGGAGCGAGGTATGATGCCATCCTTCACAGCTCCAGCA	13	259409	77775	3913	7	0.0002	4.5003	3.8693	0.2829	0.0011
	63	AACACCATAACGTGACGTCGGCGACCTCACTCCTCCATGCCCCA	0	38533	1322	1217	6	0	0.6685	0.0658	0.088	0.0009
	64	AGCACCATAACGTGGCGTCGGCGACCTAACTCCTCCATGCCCCA	1	15358	9615	1861	6	0	0.2664	0.4783	0.1345	0.0009
	65	CCGCCCGCGTATGATACCGTCTTACGGGCAGCCGTAACCACAAC	0	5993	1444	866	6	0	0.104	0.0718	0.0626	0.0009
	66	CCGCCCGCGTATGATGCCATCTTACGGGCAGCCGTAACCACAAC	0	7450	2340	1039	6	0	0.1292	0.1164	0.0751	0.0009
	67	CCGCCCGCGTATGATGCCGTCTTACGGGCAGCCGCAACCACAAT	0	4712	2972	3445	6	0	0.0817	0.1479	0.249	0.0009
	68	CCGCCCGCGTATGATGCCGTCTTACGGGCAGCCTCAACCACAAC	1	2599	2148	2492	6	0	0.0451	0.1069	0.1801	0.0009
	69	CCGCCCGCGTATGATGCCGTCTTACGGGCAGCTGCAACCACAAC	0	5675	3367	2254	6	0	0.0985	0.1675	0.1629	0.0009
	70	CCGCCCGCGTATGATGCCGTCTTACGGTCAGCCGCAACCACAAC	1	3063	1935	1926	6	0	0.0531	0.0963	0.1392	0.0009
	71	AGTACCATAACGTGGCGTCGGCGACCTCACTCCTCCATGCCCCA	1	14173	2254	1102	5	0	0.2459	0.1121	0.0797	0.0008
	72	CCGCCCGCGTATGATGCCGTCTTACGGGCAGCCGTAATCACAAC	1	2916	1622	1721	5	0	0.0506	0.0807	0.1244	0.0008
	73	CCGCCCGCGTATGATGCCGTCTTACGGGCAGTCACAACCACAAC	0	2919	1953	1966	5	0	0.0506	0.0972	0.1421	0.0008
	74	CCGCCCGCGTATGGTGCCGTCTTACGGGCAGCCGCAACCACAAC	1	4099	1470	2067	5	0	0.0711	0.0731	0.1494	0.0008
	75	CTGCCCGCGTATGATGCCGTCTTACGGGCAGCCGCAACCACAAC	0	2485	1509	1604	5	0	0.0431	0.0751	0.1159	0.0008
	76	AGATCGGGCCGGAGCGAGGTATGATGCCATCCTTCACAGCTCCA	2	274422	81135	4372	4	0	4.7608	4.0365	0.316	0.0006
	77	CCGCCCGCGTATGATACCGTCTTACGGGCAGCCGCAACCACAAC	0	5641	1433	852	4	0	0.0979	0.0713	0.0616	0.0006
	78	CCGCCCGCGTATGATGCCGTCTTACGGACAGCCACAACCACAAC	1	5826	1858	824	3	0	0.1011	0.0924	0.0596	0.0005
	79	CCGCCCGCGTATGATGCCGTCTTACGGGCAGCCGTAACCACAAT	0	4985	2026	2436	3	0	0.0865	0.1008	0.1761	0.0005
	80	CCGCCCGCGTATGATGCCGTCTTACGGGCAGCCGTGACCACAAC	0	2224	1902	2213	3	0	0.0386	0.0946	0.16	0.0005
	81	GGGAGCTTATGAGGCACGGGGTATAGTCACGTCTTACCGCACCA	1	18021	400	1843	3	0	0.3126	0.0199	0.1332	0.0005
	82	AGATCGGGCCGGAGCGAGGTATAATGCCATCCTTCACAGCTCCA	0	16125	6522	609	2	0	0.2797	0.3245	0.044	0.0003
	83	AGCACCATAACGTGACGTCGGCGACCTAACTCCTCCATGCCCCA	0	23918	3959	791	2	0	0.4149	0.197	0.0572	0.0003
	84	CCGCCCGCGTATGATGCCATCTTACGGGCAGCCGCAACCACAAC	0	7967	2579	1071	2	0	0.1382	0.1283	0.0774	0.0003
	85	CCGCCCGCGTATGATGCCGTCTTACGGGCAGCCGCAACCATAAC	0	5740	2672	2369	2	0	0.0996	0.1329	0.1712	0.0003
	86	CCGCCCGCGTATGATGCCGTCTTGCGGGCAGCCGCAACCACAAC	0	5473	2644	1439	2	0	0.0949	0.1315	0.104	0.0003
	87	TCGGGCCGGAGCGAGGTATGATGCCATTCTTCACAGCTCCAGCA	0	9226	1782	69	2	0	0.1601	0.0887	0.005	0.0003
	88	AGATCGGGCCGGAGCAAGGTATGATGCCATCCTTCACAGCTCCA	0	9784	2425	191	1	0	0.1697	0.1206	0.0138	0.0002
	89	AGATCGGGCCGGAGCGAGGTATGATGCCATTCTTCACAGCTCCA	0	10386	1970	89	1	0	0.1802	0.098	0.0064	0.0002
	90	AGATTGGGCCGGAGCGAGGTATGATGCCATCCTTCACAGCTCCA	0	10418	2548	194	1	0	0.1807	0.1268	0.014	0.0002
	91	AGCACCATAACGTGGCGTCGGCGCCCTCACTCCTCCATGCCCCA	0	10395	1473	406	1	0	0.1803	0.0733	0.0293	0.0002
	92	CCGCCCGCGTATGATGCCGTCTTACGGGCAGCCGCAACTACAAC	0	2443	1371	1601	1	0	0.0424	0.0682	0.1157	0.0002
	93	CGCCGGACGTATAATGCCATCTTGCCCGACTGCGACTAACACAA	5	21095	522	570	1	0.0001	0.366	0.026	0.0412	0.0002
	94	TCGGGCCGGAGCGAGGTATAATGCCATCCTTCACAGCTCCAGCA	0	14636	6248	583	1	0	0.2539	0.3108	0.0421	0.0002
	95	TCGGGTCGGAGCGAGGTATGATGCCATCCTTCACAGCTCCAGCA	1	8341	1830	70	1	0	0.1447	0.091	0.0051	0.0002
	96	AGATCGGACCGGAGCGAGGTATGATGCCATCCTTCACAGCTCCA	0	10693	2806	154	0	0	0.1855	0.1396	0.0111	0
	97	AGATCGGGCCGGAGCGAGGTATGATGCCATCCTTCACAACTCCA	0	7222	1456	85	0	0	0.1253	0.0724	0.0061	0
	98	AGATCGGGCCGGAGCGAGGTATGATGCCATCCTTCACAGCCCCA	0	11049	2822	150	0	0	0.1917	0.1404	0.0108	0
	99	AGATCGGGTCGGAGCGAGGTATGATGCCATCCTTCACAGCTCCA	0	9892	2146	90	0	0	0.1716	0.1068	0.0065	0
	100	CCGCCCGCGTATGATGCCGTCTTGCGGGCAGCCGTAACCACAAC	0	5154	3014	1838	0	0	0.0894	0.1499	0.1329	0
	101	TCGGACCGGAGCGAGGTATGATGCCATCCTTCACAGCTCCAGCA	0	10347	2880	110	0	0	0.1795	0.1433	0.008	0
	102	TCGGGCCGGAGCAAGGTATGATGCCATCCTTCACAGCTCCAGCA	0	10265	2713	226	0	0	0.1781	0.135	0.0163	0
	103	TCGGGCCGGAGCGAGGTATGATGCCATCCTTCACAGCCCCAGCA	0	9077	2307	102	0	0	0.1575	0.1148	0.0074	0
	104	TCGGGCCGGAGCGAGGTATGATGTCATCCTTCACAGCTCCAGCA	0	7264	1353	69	0	0	0.126	0.0673	0.005	0
	105	TTGGGCCGGAGCGAGGTATGATGCCATCCTTCACAGCTCCAGCA	0	8891	2156	150	0	0	0.1542	0.1073	0.0108	0

## Sheet: BF-dU C9
			Copy number					Frequency [%]
Clickmer	No	SEQUENCE (RANDOM REGION)	SL	C4	C6	C8	C9	SL	C4	C6	C8	C9
F20	1	CCGCCCGCGTATGATGCCGTCTTACGGGCAGCCGTAACCACAAC	10	320987	164275	190945	1141693	0.0002	5.5686	8.1727	13.8029	24.9715
	2	CCGCCCGCGTATGATGCCGTCTTACGGGCAGCCGCAACCACAAC	12	336397	191083	192519	1049330	0.0002	5.836	9.5064	13.9167	22.9513
	3	CCGCCCGCGTATGATGCCGTCTTACGGGCAGCCACAACCACAAC	2	39014	26728	26760	148005	0	0.6768	1.3297	1.9344	3.2372
	4	CCGCCCGCGTATGGTGCCGTCTTACGGGCAGCCGTAACCACAAC	0	9741	5638	12162	108042	0	0.169	0.2805	0.8792	2.3631
	5	GCGGGGTATGGTACCGTCTTACCGCTCAACGTGACGTCGGCGAC	1	145	648	2338	100611	0	0.0025	0.0322	0.169	2.2006
	6	TACCGCTCAACGTGACGTCGGCGACCTCACTCCTCCATGCCCCA	0	114	571	2181	90688	0	0.002	0.0284	0.1577	1.9836
	7	CGGAGGGAAACGTGGCGTCGGCGACCTCACTCCTCCATGCCCCA	1	169	680	2529	87118	0	0.0029	0.0338	0.1828	1.9055
	8	CAGGTATGATACCATCTTCGGAGGGAAACGTGGCGTCGGCGACC	2	136	644	2118	78017	0	0.0024	0.032	0.1531	1.7064
	9	CCGCCCGCGTATGATGCCGTCTTACGGGCAGTCGTAACCACAAC	0	12653	6833	7542	64438	0	0.2195	0.3399	0.5452	1.4094
	10	CCGCCCGCGTATGATGCCGTCTTACGGGCAGCCATAACCACAAC	1	13794	7212	7186	48998	0	0.2393	0.3588	0.5195	1.0717
	11	CCGCCCGCGTATGATGCCGTCTTACGGACAGCCGCAACCACAAC	1	37357	15478	8606	46968	0	0.6481	0.77	0.6221	1.0273
	12	CCGCCCGCGTATGATGCCGTCTTACGGACAGCCGTAACCACAAC	0	19389	7465	4099	27584	0	0.3364	0.3714	0.2963	0.6033
	13	CCGCCCGCGTATGATGTCGTCTTACGGGCAGCCGTAACCACAAC	0	11790	3318	3751	25613	0	0.2045	0.1651	0.2712	0.5602
	14	CTGGGGGTATGGTGCCGTCTTACCCATAGGCGGATCTCAGACGA	0	20963	21751	5060	24798	0	0.3637	1.0821	0.3658	0.5424
	15	CCGCCCGCGTATGATGTCGTCTTACGGGCAGCCGCAACCACAAC	1	11476	4209	3741	23785	0	0.1991	0.2094	0.2704	0.5202
	16	CCGCCCGCGTATGATGCCGTCTTACGGGCAACCGCAACCACAAC	0	20374	8095	3873	22329	0	0.3535	0.4027	0.28	0.4884
	17	CCGCCCGCGTATGATGCCGTCTTACGGGCAGCCGCAATCACAAC	0	4500	2947	3112	21394	0	0.0781	0.1466	0.225	0.4679
	18	CCGCCCGCGTATGATGCCGTCTTACGGGCAGCCGCAACCACAAT	0	4712	2972	3445	21332	0	0.0817	0.1479	0.249	0.4666
	19	CCGCCCGCGTATGGTGCCGTCTTACGGGCAGCCGCAACCACAAC	1	4099	1470	2067	19399	0	0.0711	0.0731	0.1494	0.4243
	20	CCGCCCGCGTATGATGCCGTCTTACGGGCAGCCGTGACCACAAC	0	2224	1902	2213	17373	0	0.0386	0.0946	0.16	0.38
	21	CCGCCCGCGTATGATGCCGTCTTACGAGCAGCCGTAACCACAAC	0	7938	3406	2667	16915	0	0.1377	0.1694	0.1928	0.37
	22	CCGCCCGCGTATGATGCCGTCTTACGGGCAACCGTAACCACAAC	0	9750	2741	2787	15775	0	0.1691	0.1364	0.2015	0.345
	23	CCGCCCGCGTATGATGCCGTCTTACGGGCAGCCTCAACCACAAC	1	2599	2148	2492	15558	0	0.0451	0.1069	0.1801	0.3403
	24	CCGCCCGCGTATGATGCCGTCTTACGGGCAGCCGTAACCACAAT	0	4985	2026	2436	14706	0	0.0865	0.1008	0.1761	0.3217
	25	CCGCCCGCGTATGATGCCGTCTTACGGGCAGCTGCAACCACAAC	0	5675	3367	2254	14137	0	0.0985	0.1675	0.1629	0.3092
	26	CCGCCCGCGTATGATGCCGTCTTACGGGCAGTCACAACCACAAC	0	2919	1953	1966	13611	0	0.0506	0.0972	0.1421	0.2977
	27	CCGCCCGCGTATGATGCCGTCTTACGGGCAGCTGTAACCACAAC	0	5384	2312	1814	13292	0	0.0934	0.115	0.1311	0.2907
	28	CCGCCCGCGTATGATGCCGTCTTACGGGCAGCCGCAACCATAAC	0	5740	2672	2369	12476	0	0.0996	0.1329	0.1712	0.2729
C1	29	AGCACCATAACGTGGCGTCGGCGACCTCACTCCTCCATGCCCCA	4	291754	52122	11824	10856	0.0001	5.0615	2.5931	0.8547	0.2374
	30	CCGCCCGCGTATGATGCCGTCTTACGGGCAGCCGTAATCACAAC	1	2916	1622	1721	10423	0	0.0506	0.0807	0.1244	0.228
	31	CCGCCCGCGTATGATGCCGTCTTACGAGCAGCCGCAACCACAAC	1	6667	2483	1881	10218	0	0.1157	0.1235	0.136	0.2235
	32	CCGCCCGCGTATGATGCCGTCTTACGGGCAGCCGCAACTACAAC	0	2443	1371	1601	10130	0	0.0424	0.0682	0.1157	0.2216
	33	CCGCCCGCGTATGATGCCGTCTTACGGTCAGCCGCAACCACAAC	1	3063	1935	1926	10068	0	0.0531	0.0963	0.1392	0.2202
	34	CCGCCCGCGTATAATGCCGTCTTACGGGCAGCCGTAACCACAAC	0	6671	2532	1452	9577	0	0.1157	0.126	0.105	0.2095
	35	CCGCCCGCGTATGATGCCGTCTTACGGGCAGCCGTAACTACAAC	0	2201	1242	1295	8888	0	0.0382	0.0618	0.0936	0.1944
	36	CTGCCCGCGTATGATGCCGTCTTACGGGCAGCCGCAACCACAAC	0	2485	1509	1604	8397	0	0.0431	0.0751	0.1159	0.1837
	37	CCGCCCGCGTATAATGCCGTCTTACGGGCAGCCGCAACCACAAC	0	6847	2435	1353	8215	0	0.1188	0.1211	0.0978	0.1797
	38	CTGCCCGCGTATGATGCCGTCTTACGGGCAGCCGTAACCACAAC	0	2005	966	1316	8204	0	0.0348	0.0481	0.0951	0.1794
	39	CCGCCCGCGTATGATGCCGTCTTGCGGGCAGCCGTAACCACAAC	0	5154	3014	1838	8097	0	0.0894	0.1499	0.1329	0.1771
	40	CCGCCCGCGTATGATGCCGTCTTATGGGCAGCCGTAACCACAAC	0	3105	1152	1205	7619	0	0.0539	0.0573	0.0871	0.1666
	41	CCGCCCGCGTATGATGCCGTCTTACGGGCAGCCGTAGCCACAAC	0	1659	1164	1195	7590	0	0.0288	0.0579	0.0864	0.166
	42	CCGCCCGCGTATGATGCCGTCTTATGGGCAGCCGCAACCACAAC	0	3205	1212	1305	7290	0	0.0556	0.0603	0.0943	0.1594
	43	CCGCCCGCATATGATGCCGTCTTACGGGCAGCCGTAACCACAAC	0	4634	1186	1455	6592	0	0.0804	0.059	0.1052	0.1442
	44	CCGCCCGCGTATGATGCCGTCTTACGGGCAGCCGTAACCACAAA	0	741	645	849	6321	0	0.0129	0.0321	0.0614	0.1383
	45	CCACCCGCGTATGATGCCGTCTTACGGGCAGCCGTAACCACAAC	0	3693	998	1046	6314	0	0.0641	0.0497	0.0756	0.1381
	46	CCACCCGCGTATGATGCCGTCTTACGGGCAGCCGCAACCACAAC	0	3995	1295	1109	6304	0	0.0693	0.0644	0.0802	0.1379
	47	CCGCCCGCGTATGATGCCGTCTTACGGGCAGCCTTAACCACAAC	0	1361	843	1032	6174	0	0.0236	0.0419	0.0746	0.135
	48	CCGCCCGCGTATGATGCCGTCTTACGGGCAGCCGTAACCATAAC	0	2012	981	1065	6039	0	0.0349	0.0488	0.077	0.1321
	49	CCGCCCGCGTATGATGCCATCTTACGGGCAGCCGTAACCACAAC	0	7450	2340	1039	5895	0	0.1292	0.1164	0.0751	0.1289
	50	TCGGGCCGGAGCGAGGTATGATGCCATCCTTCACAGCTCCAGCA	13	259409	77775	3913	5803	0.0002	4.5003	3.8693	0.2829	0.1269
	51	CCGCCCGCGTATGATGCCGTCTTGCGGGCAGCCGCAACCACAAC	0	5473	2644	1439	5784	0	0.0949	0.1315	0.104	0.1265
	52	CCGCCCGCATATGATGCCGTCTTACGGGCAGCCGCAACCACAAC	0	4277	1376	1422	5712	0	0.0742	0.0685	0.1028	0.1249
	53	CCGCCCGCGTATGATGCCATCTTACGGGCAGCCGCAACCACAAC	0	7967	2579	1071	5550	0	0.1382	0.1283	0.0774	0.1214
	54	CCGCCCGCGTATGATACCGTCTTACGGGCAGCCGTAACCACAAC	0	5993	1444	866	5498	0	0.104	0.0718	0.0626	0.1203
	55	AGATCGGGCCGGAGCGAGGTATGATGCCATCCTTCACAGCTCCA	2	274422	81135	4372	5274	0	4.7608	4.0365	0.316	0.1154
	56	CCGCCCGCGTATGATACCGTCTTACGGGCAGCCGCAACCACAAC	0	5641	1433	852	5228	0	0.0979	0.0713	0.0616	0.1143
	57	CCGCCCGCGTATGATGCCGTCTTACGGGCAACCACAACCACAAC	0	3378	1642	854	4783	0	0.0586	0.0817	0.0617	0.1046
	58	CCGCCCGCGTATGATGCCGTCTTACGGACAGCCACAACCACAAC	1	5826	1858	824	4388	0	0.1011	0.0924	0.0596	0.096
I10	59	CGCGTAGGTACCCGGCTTTGAATATGTAGGGGACCTAGAGAACA	24	1320806	676134	453894	3857	0.0004	22.9139	33.6378	32.8109	0.0844
	60	AGCACCATAACGTGACGTCGGCGACCTCACTCCTCCATGCCCCA	7	312703	13008	5520	3143	0.0001	5.4249	0.6472	0.399	0.0687
	61	AGCACCATAACGTGGCGTCGGCGACCTAACTCCTCCATGCCCCA	1	15358	9615	1861	2993	0	0.2664	0.4783	0.1345	0.0655
	62	AACACCATAACGTGGCGTCGGCGACCTCACTCCTCCATGCCCCA	0	27943	4855	1820	1951	0	0.4848	0.2415	0.1316	0.0427
	63	TCGGGCCGGAGCGAGGTATAATGCCATCCTTCACAGCTCCAGCA	0	14636	6248	583	1141	0	0.2539	0.3108	0.0421	0.025
	64	AGATCGGGCCGGAGCGAGGTATAATGCCATCCTTCACAGCTCCA	0	16125	6522	609	1059	0	0.2797	0.3245	0.044	0.0232
	65	AGTACCATAACGTGGCGTCGGCGACCTCACTCCTCCATGCCCCA	1	14173	2254	1102	852	0	0.2459	0.1121	0.0797	0.0186
	66	AGCACCATAACGTGACGTCGGCGACCTAACTCCTCCATGCCCCA	0	23918	3959	791	848	0	0.4149	0.197	0.0572	0.0185
	67	GGGAGCTTATGAGGCACGGGGTATAGTCACGTCTTACCGCACCA	1	18021	400	1843	830	0	0.3126	0.0199	0.1332	0.0182
	68	AACACCATAACGTGACGTCGGCGACCTCACTCCTCCATGCCCCA	0	38533	1322	1217	696	0	0.6685	0.0658	0.088	0.0152
	69	CGCATAGGTACCCGGCTTTGAATATGTAGGGGACCTAGAGAACA	0	34277	17961	13547	327	0	0.5947	0.8936	0.9793	0.0072
	70	CGCCGGACGTATAATGCCATCTTGCCCGACTGCGACTAACACAA	5	21095	522	570	321	0.0001	0.366	0.026	0.0412	0.007
	71	AGCACCATAACGTGGCGTCGGCGCCCTCACTCCTCCATGCCCCA	0	10395	1473	406	313	0	0.1803	0.0733	0.0293	0.0068
	72	TCGGGCCGGAGCAAGGTATGATGCCATCCTTCACAGCTCCAGCA	0	10265	2713	226	248	0	0.1781	0.135	0.0163	0.0054
	73	AGATCGGGCCGGAGCAAGGTATGATGCCATCCTTCACAGCTCCA	0	9784	2425	191	241	0	0.1697	0.1206	0.0138	0.0053
	74	AGATTGGGCCGGAGCGAGGTATGATGCCATCCTTCACAGCTCCA	0	10418	2548	194	205	0	0.1807	0.1268	0.014	0.0045
	75	AGATCGGACCGGAGCGAGGTATGATGCCATCCTTCACAGCTCCA	0	10693	2806	154	201	0	0.1855	0.1396	0.0111	0.0044
	76	TCGGACCGGAGCGAGGTATGATGCCATCCTTCACAGCTCCAGCA	0	10347	2880	110	194	0	0.1795	0.1433	0.008	0.0042
	77	AGATCGGGCCGGAGCGAGGTATGATGCCATCCTTCACAGCCCCA	0	11049	2822	150	189	0	0.1917	0.1404	0.0108	0.0041
	78	TTGGGCCGGAGCGAGGTATGATGCCATCCTTCACAGCTCCAGCA	0	8891	2156	150	186	0	0.1542	0.1073	0.0108	0.0041
	79	TCGGGCCGGAGCGAGGTATGATGCCATCCTTCACAGCCCCAGCA	0	9077	2307	102	183	0	0.1575	0.1148	0.0074	0.004
	80	TCGGGCCGGAGCGAGGTATGATGCCATTCTTCACAGCTCCAGCA	0	9226	1782	69	167	0	0.1601	0.0887	0.005	0.0037
	81	TCGGGTCGGAGCGAGGTATGATGCCATCCTTCACAGCTCCAGCA	1	8341	1830	70	169	0	0.1447	0.091	0.0051	0.0037
	82	AGATCGGGCCGGAGCGAGGTATGATGCCATTCTTCACAGCTCCA	0	10386	1970	89	120	0	0.1802	0.098	0.0064	0.0026
	83	CGCGTAGGTACCCGACTTTGAATATGTAGGGGACCTAGAGAACA	0	23889	6359	4397	115	0	0.4144	0.3164	0.3178	0.0025
	84	AGATCGGGTCGGAGCGAGGTATGATGCCATCCTTCACAGCTCCA	0	9892	2146	90	110	0	0.1716	0.1068	0.0065	0.0024
	85	CGCGTAGATACCCGGCTTTGAATATGTAGGGGACCTAGAGAACA	1	19316	9189	5026	99	0	0.3351	0.4572	0.3633	0.0022
	86	CGCGTAGGTACCCGGCTTTGAATATGTAGGGAACCTAGAGAACA	2	30180	13157	7056	100	0	0.5236	0.6546	0.5101	0.0022
	87	TCGGGCCGGAGCGAGGTATGATGTCATCCTTCACAGCTCCAGCA	0	7264	1353	69	101	0	0.126	0.0673	0.005	0.0022
	88	CGCGTAGGTACCCGGTTTTGAATATGTAGGGGACCTAGAGAACA	0	23274	6812	4506	98	0	0.4038	0.3389	0.3257	0.0021
	89	CGCGTAGGTACCCGGCTTTGAATATGTAGGGGACCTAAAGAACA	0	14674	8921	7396	87	0	0.2546	0.4438	0.5346	0.0019
	90	CGCGTAGGTACCCGGCTTTGAATATGTAGGGGACCTAGAAAACA	1	21756	13226	11794	87	0	0.3774	0.658	0.8526	0.0019
	91	CGCGTAGGTACCCGGCTTTGGATATGTAGGGGACCTAGAGAACA	0	5754	5272	7326	86	0	0.0998	0.2623	0.5296	0.0019
	92	AGATCGGGCCGGAGCGAGGTATGATGCCATCCTTCACAACTCCA	0	7222	1456	85	81	0	0.1253	0.0724	0.0061	0.0018
	93	CGCGTAAGTACCCGGCTTTGAATATGTAGGGGACCTAGAGAACA	1	10104	6294	3849	60	0	0.1753	0.3131	0.2782	0.0013
	94	CGCGCAGGTACCCGGCTTTGAATATGTAGGGGACCTAGAGAACA	0	7540	6329	5863	54	0	0.1308	0.3149	0.4238	0.0012
	95	CGCGTAGGTACCCGGCTTTGAATATGTAGGGGACCTATAGAACA	1	8488	7109	6124	53	0	0.1473	0.3537	0.4427	0.0012
	96	CGCGTAGGTACCCGGCTTTGAATATATAGGGGACCTAGAGAACA	0	9901	2606	1634	49	0	0.1718	0.1296	0.1181	0.0011
	97	CGCGTAGGTACCCGGCTTTGAATATGTAGGGGACTTAGAGAACA	0	11640	5878	3440	52	0	0.2019	0.2924	0.2487	0.0011
	98	CGCGTAGGTACCCGGCTTTGAATATGTAGGGGACCCAGAGAACA	0	10106	5950	4504	46	0	0.1753	0.296	0.3256	0.001
	99	CGCGTAGGTACTCGGCTTTGAATATGTAGGGGACCTAGAGAACA	1	8268	3351	2095	47	0	0.1434	0.1667	0.1514	0.001
	100	CGCGTAGGCACCCGGCTTTGAATATGTAGGGGACCTAGAGAACA	0	9404	5371	3136	41	0	0.1631	0.2672	0.2267	0.0009
	101	CGCGTAGGTACCCGGCTTTGAATATGTAGGGGACCTAGATAACA	1	8191	6739	6849	41	0	0.1421	0.3353	0.4951	0.0009
	102	CGCGTAGGTATCCGGCTTTGAATATGTAGGGGACCTAGAGAACA	0	6477	2298	1472	36	0	0.1124	0.1143	0.1064	0.0008
	103	CGCGTAGGTGCCCGGCTTTGAATATGTAGGGGACCTAGAGAACA	1	8470	4192	2988	38	0	0.1469	0.2086	0.216	0.0008
	104	CGCGTAGGTACCCGGCTTTGAATATGTAGGGGACCTAGAGAATA	0	8344	5025	4713	32	0	0.1448	0.25	0.3407	0.0007
	105	CGCGTGGGTACCCGGCTTTGAATATGTAGGGGACCTAGAGAACA	0	7989	4445	2912	33	0	0.1386	0.2211	0.2105	0.0007
	106	CGCTTAGGTACCCGGCTTTGAATATGTAGGGGACCTAGAGAACA	0	4743	2909	2566	31	0	0.0823	0.1447	0.1855	0.0007
	107	CGTGTAGGTACCCGGCTTTGAATATGTAGGGGACCTAGAGAACA	0	5862	4222	4226	31	0	0.1017	0.21	0.3055	0.0007
	108	CGCGTAGGTACCCGGCTTTAAATATGTAGGGGACCTAGAGAACA	0	7454	4134	2925	27	0	0.1293	0.2057	0.2114	0.0006
	109	CGCGTAGGTACCCGGCTTTGAATATGTAGGGGACATAGAGAACA	0	6676	3503	2016	26	0	0.1158	0.1743	0.1457	0.0006
	110	CGCGTAGGTACCCGGCTTTGAATATGTAGGGGGCCTAGAGAACA	0	5956	3807	2328	29	0	0.1033	0.1894	0.1683	0.0006
	111	CTCGTAGGTACCCGGCTTTGAATATGTAGGGGACCTAGAGAACA	0	4602	3092	3148	27	0	0.0798	0.1538	0.2276	0.0006
	112	CGCGTAGGTACCCGGCTTTGAATATGTAGGAGACCTAGAGAACA	0	4198	1569	932	21	0	0.0728	0.0781	0.0674	0.0005
	113	CGCGTAGGTACCCGGCTTTGAATATGTAGGGGACCTGGAGAACA	0	3184	1869	1348	17	0	0.0552	0.093	0.0974	0.0004
	114	CGCGTAGGTACCCGGCTTTGAATATGTAGGGGATCTAGAGAACA	0	6808	2656	1187	19	0	0.1181	0.1321	0.0858	0.0004
	115	CGCGTAGGTACCCGGCTTTGAATATGTATGGGACCTAGAGAACA	0	4095	1639	1053	16	0	0.071	0.0815	0.0761	0.0003
	116	CGCGTATGTACCCGGCTTTGAATATGTAGGGGACCTAGAGAACA	0	4677	2394	1334	14	0	0.0811	0.1191	0.0964	0.0003
	117	TGCGTAGGTACCCGGCTTTGAATATGTAGGGGACCTAGAGAACA	0	4622	2256	1630	16	0	0.0802	0.1122	0.1178	0.0003

## Sheet: ClBn-dU C9
			Copy number					Frequency [%]
Clickmer	No	SEQUENCE (RANDOM REGION)	SL	C4	C6	C8	C9	SL	C4	C6	C8	C9
C1	1	AGCACCATAACGTGGCGTCGGCGACCTCACTCCTCCATGCCCCA	4	291754	52122	11824	29254	0.0001	5.0615	2.5931	0.8547	9.6753
	2	CGGAGGGAAACGTGGCGTCGGCGACCTCACTCCTCCATGCCCCA	1	169	680	2529	16783	0	0.0029	0.0338	0.1828	5.5507
	3	CAGGTATGATACCATCTTCGGAGGGAAACGTGGCGTCGGCGACC	2	136	644	2118	13237	0	0.0024	0.032	0.1531	4.3779
	4	AGCACCATAACGTGACGTCGGCGACCTCACTCCTCCATGCCCCA	7	312703	13008	5520	9602	0.0001	5.4249	0.6472	0.399	3.1757
	5	TACCGCTCAACGTGACGTCGGCGACCTCACTCCTCCATGCCCCA	0	114	571	2181	8727	0	0.002	0.0284	0.1577	2.8863
	6	GCGGGGTATGGTACCGTCTTACCGCTCAACGTGACGTCGGCGAC	1	145	648	2338	8399	0	0.0025	0.0322	0.169	2.7778
I10	7	CGCGTAGGTACCCGGCTTTGAATATGTAGGGGACCTAGAGAACA	24	1320806	676134	453894	6234	0.0004	22.9139	33.6378	32.8109	2.0618
	8	AGCACCATAACGTGGCGTCGGCGACCTAACTCCTCCATGCCCCA	1	15358	9615	1861	5610	0	0.2664	0.4783	0.1345	1.8554
	9	AACACCATAACGTGGCGTCGGCGACCTCACTCCTCCATGCCCCA	0	27943	4855	1820	4517	0	0.4848	0.2415	0.1316	1.4939
	10	CCGCCCGCGTATGATGCCGTCTTACGGGCAGCCGCAACCACAAC	12	336397	191083	192519	2500	0.0002	5.836	9.5064	13.9167	0.8268
	11	AGTACCATAACGTGGCGTCGGCGACCTCACTCCTCCATGCCCCA	1	14173	2254	1102	2475	0	0.2459	0.1121	0.0797	0.8186
	12	AACACCATAACGTGACGTCGGCGACCTCACTCCTCCATGCCCCA	0	38533	1322	1217	2310	0	0.6685	0.0658	0.088	0.764
F20	13	CCGCCCGCGTATGATGCCGTCTTACGGGCAGCCGTAACCACAAC	10	320987	164275	190945	2043	0.0002	5.5686	8.1727	13.8029	0.6757
	14	AGCACCATAACGTGACGTCGGCGACCTAACTCCTCCATGCCCCA	0	23918	3959	791	1675	0	0.4149	0.197	0.0572	0.554
	15	AGTACCATAACGTGACGTCGGCGACCTCACTCCTCCATGCCCCA	0	22886	926	825	1326	0	0.397	0.0461	0.0596	0.4386
	16	AGCACCATAACGTGGCGTCGGCGCCCTCACTCCTCCATGCCCCA	0	10395	1473	406	1290	0	0.1803	0.0733	0.0293	0.4266
	17	AGCACCATAACGTGGCGTCGGCGACCTCACTCCTCCATGTCCCA	0	10777	1018	350	1250	0	0.187	0.0506	0.0253	0.4134
	18	AGCACCATAACGTGACGTCTGCGACCTCACTCCTCCATGCCCCA	0	10785	771	333	1017	0	0.1871	0.0384	0.0241	0.3364
	19	AGCACCATAACGTGGCGTTGGCGACCTCACTCCTCCATGCCCCA	1	7211	685	483	1010	0	0.1251	0.0341	0.0349	0.334
	20	CCGCCCGCGTATGATGCCGTCTTACGGGCAGCCACAACCACAAC	2	39014	26728	26760	567	0	0.6768	1.3297	1.9344	0.1875
	21	AGCACCATAACGTAACGTCGGCGACCTCACTCCTCCATGCCCCA	0	10980	149	239	550	0	0.1905	0.0074	0.0173	0.1819
	22	AGCACCATAACGTGACGTTGGCGACCTCACTCCTCCATGCCCCA	1	10907	187	269	451	0	0.1892	0.0093	0.0194	0.1492
	23	AGCACCATAACGTGACGTCGGCGACCTCACTCCTCCATGTCCCA	0	15324	297	187	418	0	0.2658	0.0148	0.0135	0.1382
	24	AGCACCATAACGTGACGTCGGCGCCCTCACTCCTCCATGCCCCA	0	9899	345	174	408	0	0.1717	0.0172	0.0126	0.1349
	25	CGCGTAGGTACCCGGTTTTGAATATGTAGGGGACCTAGAGAACA	0	23274	6812	4506	371	0	0.4038	0.3389	0.3257	0.1227
	26	AGCACCACAACGTGACGTCGGCGACCTCACTCCTCCATGCCCCA	0	6370	207	209	363	0	0.1105	0.0103	0.0151	0.1201
	27	CGCATAGGTACCCGGCTTTGAATATGTAGGGGACCTAGAGAACA	0	34277	17961	13547	356	0	0.5947	0.8936	0.9793	0.1177
	28	CGCGTAGGTACCCGACTTTGAATATGTAGGGGACCTAGAGAACA	0	23889	6359	4397	282	0	0.4144	0.3164	0.3178	0.0933
	29	CGCGTAGGTACTCGGCTTTGAATATGTAGGGGACCTAGAGAACA	1	8268	3351	2095	255	0	0.1434	0.1667	0.1514	0.0843
	30	CGCGTAGGTACCCGGCTTTGAATATGTAGGGAACCTAGAGAACA	2	30180	13157	7056	242	0	0.5236	0.6546	0.5101	0.08
	31	CGCGTAGATACCCGGCTTTGAATATGTAGGGGACCTAGAGAACA	1	19316	9189	5026	237	0	0.3351	0.4572	0.3633	0.0784
	32	CCGCCCGCGTATGATGCCGTCTTACGGACAGCCGCAACCACAAC	1	37357	15478	8606	218	0	0.6481	0.77	0.6221	0.0721
	33	CGCGTAGGTATCCGGCTTTGAATATGTAGGGGACCTAGAGAACA	0	6477	2298	1472	205	0	0.1124	0.1143	0.1064	0.0678
	34	CCGCCCGCGTATGATGCCGTCTTACGGGCAACCGCAACCACAAC	0	20374	8095	3873	182	0	0.3535	0.4027	0.28	0.0602
	35	CTGGGGGTATGGTGCCGTCTTACCCATAGGCGGATCTCAGACGA	0	20963	21751	5060	165	0	0.3637	1.0821	0.3658	0.0546
	36	CGCGTAAGTACCCGGCTTTGAATATGTAGGGGACCTAGAGAACA	1	10104	6294	3849	156	0	0.1753	0.3131	0.2782	0.0516
	37	CCGCCCGCGTATGATGTCGTCTTACGGGCAGCCGCAACCACAAC	1	11476	4209	3741	155	0	0.1991	0.2094	0.2704	0.0513
	38	CCGCCCGCGTATGGTGCCGTCTTACGGGCAGCCGTAACCACAAC	0	9741	5638	12162	151	0	0.169	0.2805	0.8792	0.0499
	39	CGCGTAGGTACCCGGCTTTGAATATGTAGGGGACTTAGAGAACA	0	11640	5878	3440	145	0	0.2019	0.2924	0.2487	0.048
	40	CGCGTAGGTACCCGGCTTTGGATATGTAGGGGACCTAGAGAACA	0	5754	5272	7326	141	0	0.0998	0.2623	0.5296	0.0466
	41	CGCGTAGGTACCCGGCTTTGAATATGTAGGGGACCTAGAAAACA	1	21756	13226	11794	138	0	0.3774	0.658	0.8526	0.0456
	42	CCGCCCGCGTATGATGCCGTCTTACGGGCAGTCGTAACCACAAC	0	12653	6833	7542	135	0	0.2195	0.3399	0.5452	0.0446
	43	CCGCCCGCGTATGATGCCGTCTTACGGGCAGCCATAACCACAAC	1	13794	7212	7186	134	0	0.2393	0.3588	0.5195	0.0443
	44	CGCGTAGGTACCCGGCTTTGAATATGTAGGGGGCCTAGAGAACA	0	5956	3807	2328	117	0	0.1033	0.1894	0.1683	0.0387
	45	CGCGTAGGTACCCGGCTTTGAATATGTAGGGGACCCAGAGAACA	0	10106	5950	4504	113	0	0.1753	0.296	0.3256	0.0374
	46	CGCGTAGGTACCCGGCTTTGAATATGTAGGGGACCTAAAGAACA	0	14674	8921	7396	113	0	0.2546	0.4438	0.5346	0.0374
	47	CCGCCCGCATATGATGCCGTCTTACGGGCAGCCGCAACCACAAC	0	4277	1376	1422	104	0	0.0742	0.0685	0.1028	0.0344
	48	CCGCCCGCGTATGATGCCGTCTTACGGGCAACCGTAACCACAAC	0	9750	2741	2787	104	0	0.1691	0.1364	0.2015	0.0344
	49	CCGCCCGCGTATGATGCCGTCTTACGGACAGCCGTAACCACAAC	0	19389	7465	4099	97	0	0.3364	0.3714	0.2963	0.0321
	50	CGCGTAGGCACCCGGCTTTGAATATGTAGGGGACCTAGAGAACA	0	9404	5371	3136	96	0	0.1631	0.2672	0.2267	0.0318
	51	CGCGCAGGTACCCGGCTTTGAATATGTAGGGGACCTAGAGAACA	0	7540	6329	5863	93	0	0.1308	0.3149	0.4238	0.0308
	52	CCGCCCGCGTATGATGTCGTCTTACGGGCAGCCGTAACCACAAC	0	11790	3318	3751	92	0	0.2045	0.1651	0.2712	0.0304
	53	CGCGTAGGTACCCGGCTTTGAATATGTAGGGGACCTATAGAACA	1	8488	7109	6124	90	0	0.1473	0.3537	0.4427	0.0298
	54	CGCGTAGGTACCCGGCTTTGAATATATAGGGGACCTAGAGAACA	0	9901	2606	1634	89	0	0.1718	0.1296	0.1181	0.0294
	55	CGCGTAGGTACCCGGCTTTGAATATGTAGGGGATCTAGAGAACA	0	6808	2656	1187	85	0	0.1181	0.1321	0.0858	0.0281
	56	GGGAGCTTATGAGGCACGGGGTATAGTCACGTCTTACCGCACCA	1	18021	400	1843	82	0	0.3126	0.0199	0.1332	0.0271
	57	CCGCCCGCGTATGATGCCGTCTTACGGGCAGCCGCAACCACAAT	0	4712	2972	3445	79	0	0.0817	0.1479	0.249	0.0261
	58	CCGCCCGCGTATAATGCCGTCTTACGGGCAGCCGCAACCACAAC	0	6847	2435	1353	78	0	0.1188	0.1211	0.0978	0.0258
	59	CGCGTAGGTGCCCGGCTTTGAATATGTAGGGGACCTAGAGAACA	1	8470	4192	2988	78	0	0.1469	0.2086	0.216	0.0258
	60	TCGGGCCGGAGCGAGGTATGATGCCATCCTTCACAGCTCCAGCA	13	259409	77775	3913	75	0.0002	4.5003	3.8693	0.2829	0.0248
	61	CCGCCCGCGTATGATGCCGTCTTACGGTCAGCCGCAACCACAAC	1	3063	1935	1926	74	0	0.0531	0.0963	0.1392	0.0245
	62	CGCGTAGGTACCCGGCTTTGAATATGTAGGGGACATAGAGAACA	0	6676	3503	2016	73	0	0.1158	0.1743	0.1457	0.0241
	63	CGCGTAGGTACCCGGCTTTGAATATGTATGGGACCTAGAGAACA	0	4095	1639	1053	73	0	0.071	0.0815	0.0761	0.0241
	64	CGCGTAGGTACCCGGCTTTGAATATGTAGGGGACCTAGAGAATA	0	8344	5025	4713	70	0	0.1448	0.25	0.3407	0.0232
	65	CCGCCCGCGTATGATACCGTCTTACGGGCAGCCGCAACCACAAC	0	5641	1433	852	69	0	0.0979	0.0713	0.0616	0.0228
	66	CGCGTGGGTACCCGGCTTTGAATATGTAGGGGACCTAGAGAACA	0	7989	4445	2912	69	0	0.1386	0.2211	0.2105	0.0228
	67	CGCGTATGTACCCGGCTTTGAATATGTAGGGGACCTAGAGAACA	0	4677	2394	1334	65	0	0.0811	0.1191	0.0964	0.0215
	68	CCGCCCGCGTATAATGCCGTCTTACGGGCAGCCGTAACCACAAC	0	6671	2532	1452	63	0	0.1157	0.126	0.105	0.0208
	69	CCGCCCGCGTATGATGCCGTCTTACGGGCAGCCGTAACCACAAT	0	4985	2026	2436	60	0	0.0865	0.1008	0.1761	0.0198
	70	CCGCCCGCGTATGATGCCATCTTACGGGCAGCCGTAACCACAAC	0	7450	2340	1039	58	0	0.1292	0.1164	0.0751	0.0192
	71	CCGCCCGCGTATGATGCCGTCTTACGGGCAACCACAACCACAAC	0	3378	1642	854	57	0	0.0586	0.0817	0.0617	0.0189
	72	CGCGTAGGTACCCGGCTTTGAATATGTAGGGGACCTAGATAACA	1	8191	6739	6849	57	0	0.1421	0.3353	0.4951	0.0189
	73	CCGCCCGCGTATGATGCCGTCTTACGAGCAGCCGCAACCACAAC	1	6667	2483	1881	54	0	0.1157	0.1235	0.136	0.0179
	74	CCGCCCGCGTATGATGCCGTCTTACGAGCAGCCGTAACCACAAC	0	7938	3406	2667	54	0	0.1377	0.1694	0.1928	0.0179
	75	CCGCCCGCGTATGATACCGTCTTACGGGCAGCCGTAACCACAAC	0	5993	1444	866	52	0	0.104	0.0718	0.0626	0.0172
	76	CCGCCCGCGTATGATGCCATCTTACGGGCAGCCGCAACCACAAC	0	7967	2579	1071	50	0	0.1382	0.1283	0.0774	0.0165
	77	CCGCCCGCGTATGATGCCGTCTTACGGGCAGCTGCAACCACAAC	0	5675	3367	2254	50	0	0.0985	0.1675	0.1629	0.0165
	78	CGCCGGACGTATAATGCCATCTTGCCCGACTGCGACTAACACAA	5	21095	522	570	49	0.0001	0.366	0.026	0.0412	0.0162
	79	CGTGTAGGTACCCGGCTTTGAATATGTAGGGGACCTAGAGAACA	0	5862	4222	4226	48	0	0.1017	0.21	0.3055	0.0159
	80	CCGCCCGCGTATGATGCCGTCTTACGGGCAGCCGCAATCACAAC	0	4500	2947	3112	47	0	0.0781	0.1466	0.225	0.0155
	81	AGATCGGGCCGGAGCGAGGTATGATGCCATCCTTCACAGCTCCA	2	274422	81135	4372	44	0	4.7608	4.0365	0.316	0.0146
	82	CGCGTAGGTACCCGGCTTTAAATATGTAGGGGACCTAGAGAACA	0	7454	4134	2925	43	0	0.1293	0.2057	0.2114	0.0142
	83	CCGCCCGCGTATGATGCCGTCTTACGGACAGCCACAACCACAAC	1	5826	1858	824	42	0	0.1011	0.0924	0.0596	0.0139
	84	CCGCCCGCGTATGATGCCGTCTTACGGGCAGTCACAACCACAAC	0	2919	1953	1966	42	0	0.0506	0.0972	0.1421	0.0139
	85	CGCGTAGGTACCCGGCTTTGAATATGTAGGAGACCTAGAGAACA	0	4198	1569	932	42	0	0.0728	0.0781	0.0674	0.0139
	86	CCGCCCGCGTATGATGCCGTCTTACGGGCAGCCTCAACCACAAC	1	2599	2148	2492	40	0	0.0451	0.1069	0.1801	0.0132
	87	CCGCCCGCGTATGATGCCGTCTTGCGGGCAGCCGTAACCACAAC	0	5154	3014	1838	34	0	0.0894	0.1499	0.1329	0.0112
	88	CCGCCCGCGTATGATGCCGTCTTACGGGCAGCTGTAACCACAAC	0	5384	2312	1814	33	0	0.0934	0.115	0.1311	0.0109
	89	CGCTTAGGTACCCGGCTTTGAATATGTAGGGGACCTAGAGAACA	0	4743	2909	2566	32	0	0.0823	0.1447	0.1855	0.0106
	90	CCGCCCGCGTATGATGCCGTCTTACGGGCAGCCGTAATCACAAC	1	2916	1622	1721	31	0	0.0506	0.0807	0.1244	0.0103
	91	CTCGTAGGTACCCGGCTTTGAATATGTAGGGGACCTAGAGAACA	0	4602	3092	3148	30	0	0.0798	0.1538	0.2276	0.0099
	92	CCGCCCGCGTATGATGCCGTCTTACGGGCAGCCGCAACTACAAC	0	2443	1371	1601	29	0	0.0424	0.0682	0.1157	0.0096
	93	CCGCCCGCGTATGGTGCCGTCTTACGGGCAGCCGCAACCACAAC	1	4099	1470	2067	26	0	0.0711	0.0731	0.1494	0.0086
	94	CCGCCCGCGTATGATGCCGTCTTACGGGCAGCCGTGACCACAAC	0	2224	1902	2213	24	0	0.0386	0.0946	0.16	0.0079
	95	TGCGTAGGTACCCGGCTTTGAATATGTAGGGGACCTAGAGAACA	0	4622	2256	1630	24	0	0.0802	0.1122	0.1178	0.0079
	96	CCGCCCGCGTATGATGCCGTCTTGCGGGCAGCCGCAACCACAAC	0	5473	2644	1439	23	0	0.0949	0.1315	0.104	0.0076
	97	CGCGTAGGTACCCGGCTTTGAATATGTAGGGGACCTGGAGAACA	0	3184	1869	1348	23	0	0.0552	0.093	0.0974	0.0076
	98	CCGCCCGCGTATGATGCCGTCTTACGGGCAGCCGCAACCATAAC	0	5740	2672	2369	22	0	0.0996	0.1329	0.1712	0.0073
	99	AGATCGGGCCGGAGCGAGGTATAATGCCATCCTTCACAGCTCCA	0	16125	6522	609	10	0	0.2797	0.3245	0.044	0.0033
	100	CTGCCCGCGTATGATGCCGTCTTACGGGCAGCCGCAACCACAAC	0	2485	1509	1604	10	0	0.0431	0.0751	0.1159	0.0033
	101	TCGGGCCGGAGCGAGGTATAATGCCATCCTTCACAGCTCCAGCA	0	14636	6248	583	10	0	0.2539	0.3108	0.0421	0.0033
	102	TCGGGTCGGAGCGAGGTATGATGCCATCCTTCACAGCTCCAGCA	1	8341	1830	70	8	0	0.1447	0.091	0.0051	0.0026
	103	TCGGGCCGGAGCGAGGTATGATGCCATTCTTCACAGCTCCAGCA	0	9226	1782	69	7	0	0.1601	0.0887	0.005	0.0023
	104	TCGGGCCGGAGCAAGGTATGATGCCATCCTTCACAGCTCCAGCA	0	10265	2713	226	6	0	0.1781	0.135	0.0163	0.002
	105	TCGGGCCGGAGCGAGGTATGATGTCATCCTTCACAGCTCCAGCA	0	7264	1353	69	6	0	0.126	0.0673	0.005	0.002
	106	AGATCGGGCCGGAGCAAGGTATGATGCCATCCTTCACAGCTCCA	0	9784	2425	191	4	0	0.1697	0.1206	0.0138	0.0013
	107	AGATCGGGCCGGAGCGAGGTATGATGCCATTCTTCACAGCTCCA	0	10386	1970	89	4	0	0.1802	0.098	0.0064	0.0013
	108	TCGGACCGGAGCGAGGTATGATGCCATCCTTCACAGCTCCAGCA	0	10347	2880	110	4	0	0.1795	0.1433	0.008	0.0013
	109	TTGGGCCGGAGCGAGGTATGATGCCATCCTTCACAGCTCCAGCA	0	8891	2156	150	4	0	0.1542	0.1073	0.0108	0.0013
	110	AGATCGGACCGGAGCGAGGTATGATGCCATCCTTCACAGCTCCA	0	10693	2806	154	3	0	0.1855	0.1396	0.0111	0.001
	111	AGATCGGGCCGGAGCGAGGTATGATGCCATCCTTCACAACTCCA	0	7222	1456	85	2	0	0.1253	0.0724	0.0061	0.0007
	112	TCGGGCCGGAGCGAGGTATGATGCCATCCTTCACAGCCCCAGCA	0	9077	2307	102	2	0	0.1575	0.1148	0.0074	0.0007
	113	AGATCGGGCCGGAGCGAGGTATGATGCCATCCTTCACAGCCCCA	0	11049	2822	150	1	0	0.1917	0.1404	0.0108	0.0003
	114	AGATTGGGCCGGAGCGAGGTATGATGCCATCCTTCACAGCTCCA	0	10418	2548	194	1	0	0.1807	0.1268	0.014	0.0003
	115	AGATCGGGTCGGAGCGAGGTATGATGCCATCCTTCACAGCTCCA	0	9892	2146	90	0	0	0.1716	0.1068	0.0065	0

## Sheet: Bn-dU C9
			Copy number					Frequency [%]
Clickmer	No	SEQUENCE (RANDOM REGION)	SL	C4	C6	C8	C9	SL	C4	C6	C8	C9
C1	1	AGCACCATAACGTGGCGTCGGCGACCTCACTCCTCCATGCCCCA	4	291754	52122	11824	460404	0.0001	5.0615	2.5931	0.8547	9.5512
I10	2	CGCGTAGGTACCCGGCTTTGAATATGTAGGGGACCTAGAGAACA	24	1320806	676134	453894	446672	0.0004	22.9139	33.6378	32.8109	9.2663
	3	CCGCCCGCGTATGATGCCGTCTTACGGGCAGCCGCAACCACAAC	12	336397	191083	192519	218198	0.0002	5.836	9.5064	13.9167	4.5266
F20	4	CCGCCCGCGTATGATGCCGTCTTACGGGCAGCCGTAACCACAAC	10	320987	164275	190945	191200	0.0002	5.5686	8.1727	13.8029	3.9665
	5	CGGAGGGAAACGTGGCGTCGGCGACCTCACTCCTCCATGCCCCA	1	169	680	2529	130972	0	0.0029	0.0338	0.1828	2.717
	6	AGCACCATAACGTGACGTCGGCGACCTCACTCCTCCATGCCCCA	7	312703	13008	5520	121927	0.0001	5.4249	0.6472	0.399	2.5294
	7	CAGGTATGATACCATCTTCGGAGGGAAACGTGGCGTCGGCGACC	2	136	644	2118	111931	0	0.0024	0.032	0.1531	2.322
	8	AACACCATAACGTGGCGTCGGCGACCTCACTCCTCCATGCCCCA	0	27943	4855	1820	76716	0	0.4848	0.2415	0.1316	1.5915
	9	AGCACCATAACGTGGCGTCGGCGACCTAACTCCTCCATGCCCCA	1	15358	9615	1861	74615	0	0.2664	0.4783	0.1345	1.5479
	10	CCGCCCGCGTATGATGCCGTCTTACGGGCAGCCACAACCACAAC	2	39014	26728	26760	53594	0	0.6768	1.3297	1.9344	1.1118
	11	GCGGGGTATGGTACCGTCTTACCGCTCAACGTGACGTCGGCGAC	1	145	648	2338	43448	0	0.0025	0.0322	0.169	0.9013
	12	AGTACCATAACGTGGCGTCGGCGACCTCACTCCTCCATGCCCCA	1	14173	2254	1102	42758	0	0.2459	0.1121	0.0797	0.887
	13	TACCGCTCAACGTGACGTCGGCGACCTCACTCCTCCATGCCCCA	0	114	571	2181	39514	0	0.002	0.0284	0.1577	0.8197
	14	CGCGTAGGTACCCGGTTTTGAATATGTAGGGGACCTAGAGAACA	0	23274	6812	4506	28069	0	0.4038	0.3389	0.3257	0.5823
	15	AACACCATAACGTGACGTCGGCGACCTCACTCCTCCATGCCCCA	0	38533	1322	1217	28031	0	0.6685	0.0658	0.088	0.5815
	16	CGCATAGGTACCCGGCTTTGAATATGTAGGGGACCTAGAGAACA	0	34277	17961	13547	26426	0	0.5947	0.8936	0.9793	0.5482
	17	AGCACCATAACGTGGCGTCGGCGACCTCACTCCTCCATGTCCCA	0	10777	1018	350	26185	0	0.187	0.0506	0.0253	0.5432
	18	CGCGTAGGTACCCGACTTTGAATATGTAGGGGACCTAGAGAACA	0	23889	6359	4397	24366	0	0.4144	0.3164	0.3178	0.5055
	19	CCGCCCGCGTATGATGCCGTCTTACGGACAGCCGCAACCACAAC	1	37357	15478	8606	23066	0	0.6481	0.77	0.6221	0.4785
	20	AGCACCATAACGTGGCGTTGGCGACCTCACTCCTCCATGCCCCA	1	7211	685	483	22201	0	0.1251	0.0341	0.0349	0.4606
	21	AGCACCATAACGTGACGTCGGCGACCTAACTCCTCCATGCCCCA	0	23918	3959	791	21964	0	0.4149	0.197	0.0572	0.4556
	22	AGCACCATAACGTGGCGTCGGCGCCCTCACTCCTCCATGCCCCA	0	10395	1473	406	18788	0	0.1803	0.0733	0.0293	0.3898
	23	AGTACCATAACGTGACGTCGGCGACCTCACTCCTCCATGCCCCA	0	22886	926	825	17738	0	0.397	0.0461	0.0596	0.368
	24	CGCGTAGGTACTCGGCTTTGAATATGTAGGGGACCTAGAGAACA	1	8268	3351	2095	17401	0	0.1434	0.1667	0.1514	0.361
	25	CGCGTAGGTACCCGGCTTTGAATATGTAGGGAACCTAGAGAACA	2	30180	13157	7056	17335	0	0.5236	0.6546	0.5101	0.3596
	26	CCGCCCGCGTATGATGCCGTCTTACGGGCAACCGCAACCACAAC	0	20374	8095	3873	16378	0	0.3535	0.4027	0.28	0.3398
	27	CCGCCCGCGTATGATGTCGTCTTACGGGCAGCCGCAACCACAAC	1	11476	4209	3741	14843	0	0.1991	0.2094	0.2704	0.3079
	28	CGCGTAGATACCCGGCTTTGAATATGTAGGGGACCTAGAGAACA	1	19316	9189	5026	14096	0	0.3351	0.4572	0.3633	0.2924
	29	CCGCCCGCGTATGGTGCCGTCTTACGGGCAGCCGTAACCACAAC	0	9741	5638	12162	14004	0	0.169	0.2805	0.8792	0.2905
	30	CCGCCCGCGTATGATGTCGTCTTACGGGCAGCCGTAACCACAAC	0	11790	3318	3751	13115	0	0.2045	0.1651	0.2712	0.2721
	31	AGCACCATAACGTGACGTCTGCGACCTCACTCCTCCATGCCCCA	0	10785	771	333	13046	0	0.1871	0.0384	0.0241	0.2706
	32	CGCGTAGGTATCCGGCTTTGAATATGTAGGGGACCTAGAGAACA	0	6477	2298	1472	12650	0	0.1124	0.1143	0.1064	0.2624
	33	CCGCCCGCGTATGATGCCGTCTTACGGACAGCCGTAACCACAAC	0	19389	7465	4099	11738	0	0.3364	0.3714	0.2963	0.2435
	34	CCGCCCGCGTATGATGCCGTCTTACGGGCAACCGTAACCACAAC	0	9750	2741	2787	11430	0	0.1691	0.1364	0.2015	0.2371
	35	CTGGGGGTATGGTGCCGTCTTACCCATAGGCGGATCTCAGACGA	0	20963	21751	5060	11396	0	0.3637	1.0821	0.3658	0.2364
	36	CCGCCCGCGTATGATGCCGTCTTACGGGCAGCCATAACCACAAC	1	13794	7212	7186	10635	0	0.2393	0.3588	0.5195	0.2206
	37	CCGCCCGCGTATGATGCCGTCTTACGGGCAGTCGTAACCACAAC	0	12653	6833	7542	10453	0	0.2195	0.3399	0.5452	0.2168
	38	CGCGTAGGTACCCGGCTTTGAATATGTAGGGGACCTAGAAAACA	1	21756	13226	11794	10062	0	0.3774	0.658	0.8526	0.2087
	39	CCGCCCGCATATGATGCCGTCTTACGGGCAGCCGCAACCACAAC	0	4277	1376	1422	10029	0	0.0742	0.0685	0.1028	0.2081
	40	CGCGTAGGTACCCGGCTTTGGATATGTAGGGGACCTAGAGAACA	0	5754	5272	7326	9910	0	0.0998	0.2623	0.5296	0.2056
	41	CGCGTAAGTACCCGGCTTTGAATATGTAGGGGACCTAGAGAACA	1	10104	6294	3849	9795	0	0.1753	0.3131	0.2782	0.2032
	42	CGCGTAGGTACCCGGCTTTGAATATGTAGGGGACTTAGAGAACA	0	11640	5878	3440	9543	0	0.2019	0.2924	0.2487	0.198
	43	CCGCCCGCATATGATGCCGTCTTACGGGCAGCCGTAACCACAAC	0	4634	1186	1455	9252	0	0.0804	0.059	0.1052	0.1919
	44	CGCGTAGGTACCCGGCTTTGAATATGTAGGGGACCTAAAGAACA	0	14674	8921	7396	9204	0	0.2546	0.4438	0.5346	0.1909
	45	CCGCCCGCGTATGATGCCGTCTTATGGGCAGCCGCAACCACAAC	0	3205	1212	1305	8621	0	0.0556	0.0603	0.0943	0.1788
	46	CGCGTAGGTACCCGGCTTTGAATATGTAGGGGACCTATAGAACA	1	8488	7109	6124	8113	0	0.1473	0.3537	0.4427	0.1683
	47	CCGCCCGCGTATGATGCCGTCTTATGGGCAGCCGTAACCACAAC	0	3105	1152	1205	7538	0	0.0539	0.0573	0.0871	0.1564
	48	AGCACCATAACGTGACGTCGGCGACCTCACTCCTCCATGTCCCA	0	15324	297	187	7204	0	0.2658	0.0148	0.0135	0.1494
	49	CGCGCAGGTACCCGGCTTTGAATATGTAGGGGACCTAGAGAACA	0	7540	6329	5863	7123	0	0.1308	0.3149	0.4238	0.1478
	50	CGCGTAGGTACCCGGCTTTGAATATATAGGGGACCTAGAGAACA	0	9901	2606	1634	6642	0	0.1718	0.1296	0.1181	0.1378
	51	CGCGTAGGTACCCGGCTTTGAATATGTAGGGGACCCAGAGAACA	0	10106	5950	4504	6468	0	0.1753	0.296	0.3256	0.1342
	52	CGCGTAGGTACCCGGCTTTGAATATGTAGGGGGCCTAGAGAACA	0	5956	3807	2328	6324	0	0.1033	0.1894	0.1683	0.1312
	53	AGCACCATAACGTGACGTTGGCGACCTCACTCCTCCATGCCCCA	1	10907	187	269	6190	0	0.1892	0.0093	0.0194	0.1284
	54	AGCACCATAACGTGACGTCGGCGACCTCACTCCTCCATACCCCA	0	7806	118	412	6114	0	0.1354	0.0059	0.0298	0.1268
	55	CGCGTAGGTACCCGGCTTTGAATATGTAGGGGACCTAGAGAATA	0	8344	5025	4713	5928	0	0.1448	0.25	0.3407	0.123
	56	CCGCCCGCGTATAATGCCGTCTTACGGGCAGCCGCAACCACAAC	0	6847	2435	1353	5645	0	0.1188	0.1211	0.0978	0.1171
	57	CGTGTAGGTACCCGGCTTTGAATATGTAGGGGACCTAGAGAACA	0	5862	4222	4226	5644	0	0.1017	0.21	0.3055	0.1171
	58	CCACCCGCGTATGATGCCGTCTTACGGGCAGCCGCAACCACAAC	0	3995	1295	1109	5582	0	0.0693	0.0644	0.0802	0.1158
	59	CCGCCCGCGTATGATGCCGTCTTACGAGCAGCCGCAACCACAAC	1	6667	2483	1881	5497	0	0.1157	0.1235	0.136	0.114
	60	CCGCCCGCGTATAATGCCGTCTTACGGGCAGCCGTAACCACAAC	0	6671	2532	1452	5442	0	0.1157	0.126	0.105	0.1129
	61	CCGCCCGCGTATGATGCCGTCTTACGGGCAGCCGCAACCACAAT	0	4712	2972	3445	5389	0	0.0817	0.1479	0.249	0.1118
	62	CGCGTGGGTACCCGGCTTTGAATATGTAGGGGACCTAGAGAACA	0	7989	4445	2912	5372	0	0.1386	0.2211	0.2105	0.1114
	63	AGCACCATAACGTAACGTCGGCGACCTCACTCCTCCATGCCCCA	0	10980	149	239	5264	0	0.1905	0.0074	0.0173	0.1092
	64	CGCGTAGGTACCCGGCTTTGAATATGTATGGGACCTAGAGAACA	0	4095	1639	1053	5234	0	0.071	0.0815	0.0761	0.1086
	65	CCGCCCGCGTATGATGCCGTCTTACGAGCAGCCGTAACCACAAC	0	7938	3406	2667	5188	0	0.1377	0.1694	0.1928	0.1076
	66	CCGCCCGCGTATGATGCCGTCTTACGGGCAACCACAACCACAAC	0	3378	1642	854	5175	0	0.0586	0.0817	0.0617	0.1074
	67	CGCGTAGGTGCCCGGCTTTGAATATGTAGGGGACCTAGAGAACA	1	8470	4192	2988	4966	0	0.1469	0.2086	0.216	0.103
	68	CGCGTAGGTACCCGGCTTTGAATATGTAGGGGATCTAGAGAACA	0	6808	2656	1187	4894	0	0.1181	0.1321	0.0858	0.1015
	69	CGCGTAGGTACCCGGCTTTGAATATGTAGGGGACCTAGATAACA	1	8191	6739	6849	4869	0	0.1421	0.3353	0.4951	0.101
	70	TCGGGCCGGAGCGAGGTATGATGCCATCCTTCACAGCTCCAGCA	13	259409	77775	3913	4750	0.0002	4.5003	3.8693	0.2829	0.0985
	71	CCGCCCGCGTATGATACCGTCTTACGGGCAGCCGCAACCACAAC	0	5641	1433	852	4672	0	0.0979	0.0713	0.0616	0.0969
	72	CGCGTAGGCACCCGGCTTTGAATATGTAGGGGACCTAGAGAACA	0	9404	5371	3136	4653	0	0.1631	0.2672	0.2267	0.0965
	73	CGCGTAGGTACCCGGCTTTAAATATGTAGGGGACCTAGAGAACA	0	7454	4134	2925	4624	0	0.1293	0.2057	0.2114	0.0959
	74	AGATCGGGCCGGAGCGAGGTATGATGCCATCCTTCACAGCTCCA	2	274422	81135	4372	4563	0	4.7608	4.0365	0.316	0.0947
	75	CGCGTAGGTACCCGGCTTTGAATATGTAGGGGACATAGAGAACA	0	6676	3503	2016	4567	0	0.1158	0.1743	0.1457	0.0947
	76	CCGCCCGCGTATGATGCCGTCTTACGGGCAGTCACAACCACAAC	0	2919	1953	1966	4542	0	0.0506	0.0972	0.1421	0.0942
	77	CCGCCCGCGTATGATGCCATCTTACGGGCAGCCGCAACCACAAC	0	7967	2579	1071	4533	0	0.1382	0.1283	0.0774	0.094
	78	CCGCCCGCGTATGATGCCGTCTTACGGTCAGCCGCAACCACAAC	1	3063	1935	1926	4429	0	0.0531	0.0963	0.1392	0.0919
	79	CCGCCCGCGTATGATGCCGTCTTACGGGCAGCTGCAACCACAAC	0	5675	3367	2254	4379	0	0.0985	0.1675	0.1629	0.0908
	80	CCGCCCGCGTATGATGCCGTCTTACGGACAGCCACAACCACAAC	1	5826	1858	824	4354	0	0.1011	0.0924	0.0596	0.0903
	81	CCGCCCGCGTATGATACCGTCTTACGGGCAGCCGTAACCACAAC	0	5993	1444	866	4275	0	0.104	0.0718	0.0626	0.0887
	82	GGGAGCTTATGAGGCACGGGGTATAGTCACGTCTTACCGCACCA	1	18021	400	1843	4140	0	0.3126	0.0199	0.1332	0.0859
	83	CCGCCCGCGTATGATGCCGTCTTACGGGCAGCCGCAATCACAAC	0	4500	2947	3112	4131	0	0.0781	0.1466	0.225	0.0857
	84	CCGCCCGCGTATGATGCCATCTTACGGGCAGCCGTAACCACAAC	0	7450	2340	1039	4063	0	0.1292	0.1164	0.0751	0.0843
	85	CCGCCCGCGTATGATGCCGTCTTACGGGCAGCCGTAACCACAAT	0	4985	2026	2436	3819	0	0.0865	0.1008	0.1761	0.0792
	86	CGCGTATGTACCCGGCTTTGAATATGTAGGGGACCTAGAGAACA	0	4677	2394	1334	3763	0	0.0811	0.1191	0.0964	0.0781
	87	CCGCCCGCGTATGATGCCGTCTTACGGGCAGCTGTAACCACAAC	0	5384	2312	1814	3360	0	0.0934	0.115	0.1311	0.0697
	88	CCGCCCGCGTATGGTGCCGTCTTACGGGCAGCCGCAACCACAAC	1	4099	1470	2067	3244	0	0.0711	0.0731	0.1494	0.0673
	89	CCGCCCGCGTATGATGCCGTCTTACGGGCAGCCTCAACCACAAC	1	2599	2148	2492	3146	0	0.0451	0.1069	0.1801	0.0653
	90	CGCGTAGGTACCCGGCTTTGAATATGTAGGAGACCTAGAGAACA	0	4198	1569	932	2932	0	0.0728	0.0781	0.0674	0.0608
	91	CGCTTAGGTACCCGGCTTTGAATATGTAGGGGACCTAGAGAACA	0	4743	2909	2566	2878	0	0.0823	0.1447	0.1855	0.0597
	92	CTCGTAGGTACCCGGCTTTGAATATGTAGGGGACCTAGAGAACA	0	4602	3092	3148	2784	0	0.0798	0.1538	0.2276	0.0578
	93	CCGCCCGCGTATGATGCCGTCTTACGGGCAGCCGTGACCACAAC	0	2224	1902	2213	2530	0	0.0386	0.0946	0.16	0.0525
	94	CCGCCCGCGTATGATGCCGTCTTGCGGGCAGCCGTAACCACAAC	0	5154	3014	1838	2299	0	0.0894	0.1499	0.1329	0.0477
	95	TGCGTAGGTACCCGGCTTTGAATATGTAGGGGACCTAGAGAACA	0	4622	2256	1630	2295	0	0.0802	0.1122	0.1178	0.0476
	96	CCGCCCGCGTATGATGCCGTCTTACGGGCAGCCGCAACCATAAC	0	5740	2672	2369	2104	0	0.0996	0.1329	0.1712	0.0436
	97	CCGCCCGCGTATGATGCCGTCTTACGGGCAGCCGTAATCACAAC	1	2916	1622	1721	2080	0	0.0506	0.0807	0.1244	0.0431
	98	CCGCCCGCGTATGATGCCGTCTTGCGGGCAGCCGCAACCACAAC	0	5473	2644	1439	1907	0	0.0949	0.1315	0.104	0.0396
	99	CCGCCCGCGTATGATGCCGTCTTACGGGCAGCCGCAACTACAAC	0	2443	1371	1601	1886	0	0.0424	0.0682	0.1157	0.0391
	100	CGCGTAGGTACCCGGCTTTGAATATGTAGGGGACCTGGAGAACA	0	3184	1869	1348	1781	0	0.0552	0.093	0.0974	0.0369
	101	CTGCCCGCGTATGATGCCGTCTTACGGGCAGCCGCAACCACAAC	0	2485	1509	1604	1453	0	0.0431	0.0751	0.1159	0.0301
	102	CGCCGGACGTATAATGCCATCTTGCCCGACTGCGACTAACACAA	5	21095	522	570	787	0.0001	0.366	0.026	0.0412	0.0163
	103	AGATCGGGCCGGAGCGAGGTATAATGCCATCCTTCACAGCTCCA	0	16125	6522	609	663	0	0.2797	0.3245	0.044	0.0138
	104	TCGGGCCGGAGCGAGGTATAATGCCATCCTTCACAGCTCCAGCA	0	14636	6248	583	659	0	0.2539	0.3108	0.0421	0.0137
	105	AGATCGGGCCGGAGCGAGGTATGATGCCATTCTTCACAGCTCCA	0	10386	1970	89	541	0	0.1802	0.098	0.0064	0.0112
	106	TCGGGCCGGAGCGAGGTATGATGCCATTCTTCACAGCTCCAGCA	0	9226	1782	69	511	0	0.1601	0.0887	0.005	0.0106
	107	AGATCGGGCCGGAGCGAGGTATGATGCCATCCTTCACAACTCCA	0	7222	1456	85	403	0	0.1253	0.0724	0.0061	0.0084
	108	TCGGGCCGGAGCGAGGTATGATGTCATCCTTCACAGCTCCAGCA	0	7264	1353	69	377	0	0.126	0.0673	0.005	0.0078
	109	TCGGACCGGAGCGAGGTATGATGCCATCCTTCACAGCTCCAGCA	0	10347	2880	110	343	0	0.1795	0.1433	0.008	0.0071
	110	AGATCGGACCGGAGCGAGGTATGATGCCATCCTTCACAGCTCCA	0	10693	2806	154	328	0	0.1855	0.1396	0.0111	0.0068
	111	AGATCGGGCCGGAGCGAGGTATGATGCCATCCTTCACAGCCCCA	0	11049	2822	150	303	0	0.1917	0.1404	0.0108	0.0063
	112	TCGGGCCGGAGCGAGGTATGATGCCATCCTTCACAGCCCCAGCA	0	9077	2307	102	290	0	0.1575	0.1148	0.0074	0.006
	113	TCGGGTCGGAGCGAGGTATGATGCCATCCTTCACAGCTCCAGCA	1	8341	1830	70	289	0	0.1447	0.091	0.0051	0.006
	114	TCGGGCCGGAGCAAGGTATGATGCCATCCTTCACAGCTCCAGCA	0	10265	2713	226	264	0	0.1781	0.135	0.0163	0.0055
	115	AGATCGGGCCGGAGCAAGGTATGATGCCATCCTTCACAGCTCCA	0	9784	2425	191	251	0	0.1697	0.1206	0.0138	0.0052
	116	AGATCGGGTCGGAGCGAGGTATGATGCCATCCTTCACAGCTCCA	0	9892	2146	90	236	0	0.1716	0.1068	0.0065	0.0049
	117	AGATTGGGCCGGAGCGAGGTATGATGCCATCCTTCACAGCTCCA	0	10418	2548	194	232	0	0.1807	0.1268	0.014	0.0048
	118	TTGGGCCGGAGCGAGGTATGATGCCATCCTTCACAGCTCCAGCA	0	8891	2156	150	210	0	0.1542	0.1073	0.0108	0.0044

## Sheet: Ea-dU C9
			Copy number					Frequency [%]
Clickmer	No	SEQUENCE (RANDOM REGION)	SL	C4	C6	C8	C9	SL	C4	C6	C8	C9
I10	1	CGCGTAGGTACCCGGCTTTGAATATGTAGGGGACCTAGAGAACA	24	1320806	676134	453894	670360	0.0004	22.9139	33.6378	32.8109	16.3179
	2	CCGCCCGCGTATGATGCCGTCTTACGGGCAGCCGCAACCACAAC	12	336397	191083	192519	303204	0.0002	5.836	9.5064	13.9167	7.3806
F20	3	CCGCCCGCGTATGATGCCGTCTTACGGGCAGCCGTAACCACAAC	10	320987	164275	190945	260533	0.0002	5.5686	8.1727	13.8029	6.3419
	4	AGCACCATAACGTGACGTCGGCGACCTCACTCCTCCATGCCCCA	7	312703	13008	5520	88181	0.0001	5.4249	0.6472	0.399	2.1465
C1	5	AGCACCATAACGTGGCGTCGGCGACCTCACTCCTCCATGCCCCA	4	291754	52122	11824	77686	0.0001	5.0615	2.5931	0.8547	1.891
	6	CCGCCCGCGTATGATGCCGTCTTACGGGCAGCCACAACCACAAC	2	39014	26728	26760	67963	0	0.6768	1.3297	1.9344	1.6544
	7	CGCATAGGTACCCGGCTTTGAATATGTAGGGGACCTAGAGAACA	0	34277	17961	13547	43868	0	0.5947	0.8936	0.9793	1.0678
	8	CCGCCCGCGTATGATGCCGTCTTACGGACAGCCGCAACCACAAC	1	37357	15478	8606	36930	0	0.6481	0.77	0.6221	0.8989
	9	CGCGTAGGTACCCGGTTTTGAATATGTAGGGGACCTAGAGAACA	0	23274	6812	4506	35713	0	0.4038	0.3389	0.3257	0.8693
	10	CGCGTAGGTACCCGACTTTGAATATGTAGGGGACCTAGAGAACA	0	23889	6359	4397	33158	0	0.4144	0.3164	0.3178	0.8071
	11	GCGGGGTATGGTACCGTCTTACCGCTCAACGTGACGTCGGCGAC	1	145	648	2338	31580	0	0.0025	0.0322	0.169	0.7687
	12	CGCGTAGGTACCCGGCTTTGAATATGTAGGGAACCTAGAGAACA	2	30180	13157	7056	31566	0	0.5236	0.6546	0.5101	0.7684
	13	TACCGCTCAACGTGACGTCGGCGACCTCACTCCTCCATGCCCCA	0	114	571	2181	28993	0	0.002	0.0284	0.1577	0.7057
	14	CGCGTAGGTACTCGGCTTTGAATATGTAGGGGACCTAGAGAACA	1	8268	3351	2095	22835	0	0.1434	0.1667	0.1514	0.5558
	15	AACACCATAACGTGACGTCGGCGACCTCACTCCTCCATGCCCCA	0	38533	1322	1217	22617	0	0.6685	0.0658	0.088	0.5505
	16	CCGCCCGCGTATGATGCCGTCTTACGGACAGCCGTAACCACAAC	0	19389	7465	4099	20561	0	0.3364	0.3714	0.2963	0.5005
	17	CCGCCCGCGTATGATGTCGTCTTACGGGCAGCCGCAACCACAAC	1	11476	4209	3741	19497	0	0.1991	0.2094	0.2704	0.4746
	18	CCGCCCGCGTATGATGCCGTCTTACGGGCAACCGCAACCACAAC	0	20374	8095	3873	19308	0	0.3535	0.4027	0.28	0.47
	19	CGGAGGGAAACGTGGCGTCGGCGACCTCACTCCTCCATGCCCCA	1	169	680	2529	17127	0	0.0029	0.0338	0.1828	0.4169
	20	CCGCCCGCGTATGATGTCGTCTTACGGGCAGCCGTAACCACAAC	0	11790	3318	3751	17088	0	0.2045	0.1651	0.2712	0.416
	21	CAGGTATGATACCATCTTCGGAGGGAAACGTGGCGTCGGCGACC	2	136	644	2118	15949	0	0.0024	0.032	0.1531	0.3882
	22	CCGCCCGCATATGATGCCGTCTTACGGGCAGCCGCAACCACAAC	0	4277	1376	1422	15777	0	0.0742	0.0685	0.1028	0.384
	23	CGCGTAGGTATCCGGCTTTGAATATGTAGGGGACCTAGAGAACA	0	6477	2298	1472	15749	0	0.1124	0.1143	0.1064	0.3834
	24	CCGCCCGCGTATGATGCCGTCTTACGGGCAGCCATAACCACAAC	1	13794	7212	7186	14601	0	0.2393	0.3588	0.5195	0.3554
	25	CCGCCCGCGTATGATGCCGTCTTACGGGCAACCGTAACCACAAC	0	9750	2741	2787	14303	0	0.1691	0.1364	0.2015	0.3482
	26	CCGCCCGCGTATGGTGCCGTCTTACGGGCAGCCGTAACCACAAC	0	9741	5638	12162	14248	0	0.169	0.2805	0.8792	0.3468
	27	CGCGTAGGTACCCGGCTTTGAATATGTAGGGGACCTAAAGAACA	0	14674	8921	7396	14200	0	0.2546	0.4438	0.5346	0.3457
	28	AACACCATAACGTGGCGTCGGCGACCTCACTCCTCCATGCCCCA	0	27943	4855	1820	14150	0	0.4848	0.2415	0.1316	0.3444
	29	CCGCCCGCATATGATGCCGTCTTACGGGCAGCCGTAACCACAAC	0	4634	1186	1455	14110	0	0.0804	0.059	0.1052	0.3435
	30	CGCGTAGGTACCCGGCTTTGAATATGTAGGGGACTTAGAGAACA	0	11640	5878	3440	14049	0	0.2019	0.2924	0.2487	0.342
	31	CGCGTAGATACCCGGCTTTGAATATGTAGGGGACCTAGAGAACA	1	19316	9189	5026	13791	0	0.3351	0.4572	0.3633	0.3357
	32	CCGCCCGCGTATGATGCCGTCTTACGGGCAGTCGTAACCACAAC	0	12653	6833	7542	13179	0	0.2195	0.3399	0.5452	0.3208
	33	CGCGTAGGTACCCGGCTTTGGATATGTAGGGGACCTAGAGAACA	0	5754	5272	7326	12881	0	0.0998	0.2623	0.5296	0.3135
	34	AGCACCATAACGTGACGTCGGCGACCTAACTCCTCCATGCCCCA	0	23918	3959	791	12863	0	0.4149	0.197	0.0572	0.3131
	35	CGCGTAAGTACCCGGCTTTGAATATGTAGGGGACCTAGAGAACA	1	10104	6294	3849	11661	0	0.1753	0.3131	0.2782	0.2839
	36	CGCGTAGGTACCCGGCTTTGAATATGTAGGGGACCTAGAAAACA	1	21756	13226	11794	11410	0	0.3774	0.658	0.8526	0.2777
	37	CCGCCCGCGTATAATGCCGTCTTACGGGCAGCCGCAACCACAAC	0	6847	2435	1353	10925	0	0.1188	0.1211	0.0978	0.2659
	38	CGCGCAGGTACCCGGCTTTGAATATGTAGGGGACCTAGAGAACA	0	7540	6329	5863	10569	0	0.1308	0.3149	0.4238	0.2573
	39	AGCACCATAACGTGGCGTCGGCGACCTAACTCCTCCATGCCCCA	1	15358	9615	1861	10544	0	0.2664	0.4783	0.1345	0.2567
	40	CCGCCCGCGTATGATGCCGTCTTATGGGCAGCCGCAACCACAAC	0	3205	1212	1305	10370	0	0.0556	0.0603	0.0943	0.2524
	41	CGCGTAGGTACCCGGCTTTGAATATGTAGGGGACCTATAGAACA	1	8488	7109	6124	10233	0	0.1473	0.3537	0.4427	0.2491
	42	AGCACCATAACGTGACGTCGGCGACCTCACTCCTCCATGTCCCA	0	15324	297	187	10230	0	0.2658	0.0148	0.0135	0.249
	43	CCGCCCGCGTATAATGCCGTCTTACGGGCAGCCGTAACCACAAC	0	6671	2532	1452	10223	0	0.1157	0.126	0.105	0.2488
	44	CGCGTAGGTACCCGGCTTTGAATATATAGGGGACCTAGAGAACA	0	9901	2606	1634	10056	0	0.1718	0.1296	0.1181	0.2448
	45	CGCGTAGGTACCCGGCTTTGAATATGTAGGGGACCCAGAGAACA	0	10106	5950	4504	9745	0	0.1753	0.296	0.3256	0.2372
	46	CGCGTAGGTACCCGGCTTTGAATATGTATGGGACCTAGAGAACA	0	4095	1639	1053	9415	0	0.071	0.0815	0.0761	0.2292
	47	CGCGTAGGTACCCGGCTTTGAATATGTAGGGGACATAGAGAACA	0	6676	3503	2016	9158	0	0.1158	0.1743	0.1457	0.2229
	48	CCGCCCGCGTATGATGCCGTCTTACGGGCAGCCGCAACCACAAT	0	4712	2972	3445	9051	0	0.0817	0.1479	0.249	0.2203
	49	CCGCCCGCGTATGATGCCGTCTTATGGGCAGCCGTAACCACAAC	0	3105	1152	1205	8877	0	0.0539	0.0573	0.0871	0.2161
	50	CTGGGGGTATGGTGCCGTCTTACCCATAGGCGGATCTCAGACGA	0	20963	21751	5060	8765	0	0.3637	1.0821	0.3658	0.2134
	51	CGCGTAGGCACCCGGCTTTGAATATGTAGGGGACCTAGAGAACA	0	9404	5371	3136	8755	0	0.1631	0.2672	0.2267	0.2131
	52	AGATCGGGCCGGAGCGAGGTATGATGCCATCCTTCACAGCTCCA	2	274422	81135	4372	8543	0	4.7608	4.0365	0.316	0.208
	53	CGCGTAGGTACCCGGCTTTGAATATGTAGGAGACCTAGAGAACA	0	4198	1569	932	8386	0	0.0728	0.0781	0.0674	0.2041
	54	AGCACCATAACGTGACGTTGGCGACCTCACTCCTCCATGCCCCA	1	10907	187	269	8318	0	0.1892	0.0093	0.0194	0.2025
	55	CCGCCCGCGTATGATGCCGTCTTACGAGCAGCCGCAACCACAAC	1	6667	2483	1881	8320	0	0.1157	0.1235	0.136	0.2025
	56	CCGCCCGCGTATGATGCCGTCTTACGAGCAGCCGTAACCACAAC	0	7938	3406	2667	8210	0	0.1377	0.1694	0.1928	0.1998
	57	AGTACCATAACGTGACGTCGGCGACCTCACTCCTCCATGCCCCA	0	22886	926	825	8125	0	0.397	0.0461	0.0596	0.1978
	58	CGCGTAGGTGCCCGGCTTTGAATATGTAGGGGACCTAGAGAACA	1	8470	4192	2988	8118	0	0.1469	0.2086	0.216	0.1976
	59	AGCACCATAACGTGGCGTCGGCGACCTCACTCCTCCATGTCCCA	0	10777	1018	350	8034	0	0.187	0.0506	0.0253	0.1956
	60	AGCACCATAACGTGGCGTTGGCGACCTCACTCCTCCATGCCCCA	1	7211	685	483	8001	0	0.1251	0.0341	0.0349	0.1948
	61	AGCACCATAACGTGACGTCGGCGACCTCACTCCTCCATACCCCA	0	7806	118	412	7985	0	0.1354	0.0059	0.0298	0.1944
	62	CGCGTGGGTACCCGGCTTTGAATATGTAGGGGACCTAGAGAACA	0	7989	4445	2912	7910	0	0.1386	0.2211	0.2105	0.1925
	63	AGCACCATAACGTAACGTCGGCGACCTCACTCCTCCATGCCCCA	0	10980	149	239	7643	0	0.1905	0.0074	0.0173	0.186
	64	CCACCCGCGTATGATGCCGTCTTACGGGCAGCCGCAACCACAAC	0	3995	1295	1109	7509	0	0.0693	0.0644	0.0802	0.1828
	65	CGCGTAGGTACCCGGCTTTGAATATGTAGGGGGCCTAGAGAACA	0	5956	3807	2328	7457	0	0.1033	0.1894	0.1683	0.1815
	66	TCGGGCCGGAGCGAGGTATGATGCCATCCTTCACAGCTCCAGCA	13	259409	77775	3913	7335	0.0002	4.5003	3.8693	0.2829	0.1785
	67	CGCGTAGGTACCCGGCTTTGAATATGTAGGGGACCTAGAGAATA	0	8344	5025	4713	7007	0	0.1448	0.25	0.3407	0.1706
	68	CCGCCCGCGTATGATGCCGTCTTACGGACAGCCACAACCACAAC	1	5826	1858	824	6568	0	0.1011	0.0924	0.0596	0.1599
	69	CCGCCCGCGTATGATACCGTCTTACGGGCAGCCGCAACCACAAC	0	5641	1433	852	6422	0	0.0979	0.0713	0.0616	0.1563
	70	CGCGTAGGTACCCGGCTTTGAATATGTAGGGGATCTAGAGAACA	0	6808	2656	1187	6372	0	0.1181	0.1321	0.0858	0.1551
	71	CGCGTAGGTACCCGGCTTTAAATATGTAGGGGACCTAGAGAACA	0	7454	4134	2925	6254	0	0.1293	0.2057	0.2114	0.1522
	72	CCGCCCGCGTATGATGCCGTCTTACGGGCAGTCACAACCACAAC	0	2919	1953	1966	6060	0	0.0506	0.0972	0.1421	0.1475
	73	CCACCCGCGTATGATGCCGTCTTACGGGCAGCCGTAACCACAAC	0	3693	998	1046	5850	0	0.0641	0.0497	0.0756	0.1424
	74	GGGAGCTTATGAGGCACGGGGTATAGTCACGTCTTACCGCACCA	1	18021	400	1843	5834	0	0.3126	0.0199	0.1332	0.142
	75	CGCGTAGGTACCCGGCTTTGAATATGTAGGGGACCTAGATAACA	1	8191	6739	6849	5690	0	0.1421	0.3353	0.4951	0.1385
	76	AGTACCATAACGTGGCGTCGGCGACCTCACTCCTCCATGCCCCA	1	14173	2254	1102	5682	0	0.2459	0.1121	0.0797	0.1383
	77	CCGCCCGCGTATGATGCCGTCTTACGGGCAGCCGTAACCACAAT	0	4985	2026	2436	5658	0	0.0865	0.1008	0.1761	0.1377
	78	CCGCCCGCGTATGATACCGTCTTACGGGCAGCCGTAACCACAAC	0	5993	1444	866	5645	0	0.104	0.0718	0.0626	0.1374
	79	CGTGTAGGTACCCGGCTTTGAATATGTAGGGGACCTAGAGAACA	0	5862	4222	4226	5644	0	0.1017	0.21	0.3055	0.1374
	80	CCGCCCGCGTATGATGCCGTCTTACGGTCAGCCGCAACCACAAC	1	3063	1935	1926	5585	0	0.0531	0.0963	0.1392	0.1359
	81	CCGCCCGCGTATGATGCCATCTTACGGGCAGCCGCAACCACAAC	0	7967	2579	1071	5441	0	0.1382	0.1283	0.0774	0.1324
	82	CCGCCCGCGTATGATGCCGTCTTACGGGCAGCCGCAATCACAAC	0	4500	2947	3112	5271	0	0.0781	0.1466	0.225	0.1283
	83	CCGCCCGCGTATGATGCCGTCTTACGGGCAGCTGCAACCACAAC	0	5675	3367	2254	5240	0	0.0985	0.1675	0.1629	0.1276
	84	CCGCCCGCGTATGATGCCGTCTTACGGGCAGCCTCAACCACAAC	1	2599	2148	2492	5191	0	0.0451	0.1069	0.1801	0.1264
	85	CCGCCCGCGTATGATGCCGTCTTACGGGCAACCACAACCACAAC	0	3378	1642	854	5156	0	0.0586	0.0817	0.0617	0.1255
	86	CCGCCCGCGTATGATGCCATCTTACGGGCAGCCGTAACCACAAC	0	7450	2340	1039	4848	0	0.1292	0.1164	0.0751	0.118
	87	AGCACCACAACGTGACGTCGGCGACCTCACTCCTCCATGCCCCA	0	6370	207	209	4484	0	0.1105	0.0103	0.0151	0.1091
	88	CTCGTAGGTACCCGGCTTTGAATATGTAGGGGACCTAGAGAACA	0	4602	3092	3148	4350	0	0.0798	0.1538	0.2276	0.1059
	89	CGCTTAGGTACCCGGCTTTGAATATGTAGGGGACCTAGAGAACA	0	4743	2909	2566	4111	0	0.0823	0.1447	0.1855	0.1001
	90	CGCGTATGTACCCGGCTTTGAATATGTAGGGGACCTAGAGAACA	0	4677	2394	1334	3724	0	0.0811	0.1191	0.0964	0.0906
	91	CGCGTAGGTACCCGGCTTTGAATATGTAGGGGACCTGGAGAACA	0	3184	1869	1348	3697	0	0.0552	0.093	0.0974	0.09
	92	CCGCCCGCGTATGATGCCGTCTTACGGGCAGCTGTAACCACAAC	0	5384	2312	1814	3674	0	0.0934	0.115	0.1311	0.0894
	93	CCGCCCGCGTATGGTGCCGTCTTACGGGCAGCCGCAACCACAAC	1	4099	1470	2067	3661	0	0.0711	0.0731	0.1494	0.0891
	94	TGCGTAGGTACCCGGCTTTGAATATGTAGGGGACCTAGAGAACA	0	4622	2256	1630	3573	0	0.0802	0.1122	0.1178	0.087
	95	CCGCCCGCGTATGATGCCGTCTTGCGGGCAGCCGTAACCACAAC	0	5154	3014	1838	3132	0	0.0894	0.1499	0.1329	0.0762
	96	CCGCCCGCGTATGATGCCGTCTTACGGGCAGCCGCAACCATAAC	0	5740	2672	2369	2995	0	0.0996	0.1329	0.1712	0.0729
	97	CCGCCCGCGTATGATGCCGTCTTACGGGCAGCCGTAATCACAAC	1	2916	1622	1721	2488	0	0.0506	0.0807	0.1244	0.0606
	98	CCGCCCGCGTATGATGCCGTCTTGCGGGCAGCCGCAACCACAAC	0	5473	2644	1439	2477	0	0.0949	0.1315	0.104	0.0603
	99	CCGCCCGCGTATGATGCCGTCTTACGGGCAGCCGCAACTACAAC	0	2443	1371	1601	2428	0	0.0424	0.0682	0.1157	0.0591
	100	CCGCCCGCGTATGATGCCGTCTTACGGGCAGCCGTGACCACAAC	0	2224	1902	2213	2297	0	0.0386	0.0946	0.16	0.0559
	101	CTGCCCGCGTATGATGCCGTCTTACGGGCAGCCGCAACCACAAC	0	2485	1509	1604	1906	0	0.0431	0.0751	0.1159	0.0464
	102	AGATCGGGCCGGAGCGAGGTATAATGCCATCCTTCACAGCTCCA	0	16125	6522	609	1849	0	0.2797	0.3245	0.044	0.045
	103	TCGGGCCGGAGCGAGGTATAATGCCATCCTTCACAGCTCCAGCA	0	14636	6248	583	1593	0	0.2539	0.3108	0.0421	0.0388
	104	CGCCGGACGTATAATGCCATCTTGCCCGACTGCGACTAACACAA	5	21095	522	570	1541	0.0001	0.366	0.026	0.0412	0.0375
	105	AGCACCATAACGTGGCGTCGGCGCCCTCACTCCTCCATGCCCCA	0	10395	1473	406	1470	0	0.1803	0.0733	0.0293	0.0358
	106	AGATCGGGCCGGAGCGAGGTATGATGCCATTCTTCACAGCTCCA	0	10386	1970	89	958	0	0.1802	0.098	0.0064	0.0233
	107	AGATCGGGCCGGAGCGAGGTATGATGCCATCCTTCACAACTCCA	0	7222	1456	85	803	0	0.1253	0.0724	0.0061	0.0195
	108	AGATCGGACCGGAGCGAGGTATGATGCCATCCTTCACAGCTCCA	0	10693	2806	154	798	0	0.1855	0.1396	0.0111	0.0194
	109	TCGGGCCGGAGCGAGGTATGATGCCATTCTTCACAGCTCCAGCA	0	9226	1782	69	788	0	0.1601	0.0887	0.005	0.0192
	110	TCGGACCGGAGCGAGGTATGATGCCATCCTTCACAGCTCCAGCA	0	10347	2880	110	725	0	0.1795	0.1433	0.008	0.0176
	111	AGATCGGGCCGGAGCGAGGTATGATGCCATCCTTCACAGCCCCA	0	11049	2822	150	672	0	0.1917	0.1404	0.0108	0.0164
	112	TCGGGCCGGAGCAAGGTATGATGCCATCCTTCACAGCTCCAGCA	0	10265	2713	226	663	0	0.1781	0.135	0.0163	0.0161
	113	AGATCGGGCCGGAGCAAGGTATGATGCCATCCTTCACAGCTCCA	0	9784	2425	191	647	0	0.1697	0.1206	0.0138	0.0157
	114	TCGGGCCGGAGCGAGGTATGATGTCATCCTTCACAGCTCCAGCA	0	7264	1353	69	631	0	0.126	0.0673	0.005	0.0154
	115	AGATCGGGTCGGAGCGAGGTATGATGCCATCCTTCACAGCTCCA	0	9892	2146	90	560	0	0.1716	0.1068	0.0065	0.0136
	116	AGATTGGGCCGGAGCGAGGTATGATGCCATCCTTCACAGCTCCA	0	10418	2548	194	523	0	0.1807	0.1268	0.014	0.0127
	117	TCGGGCCGGAGCGAGGTATGATGCCATCCTTCACAGCCCCAGCA	0	9077	2307	102	504	0	0.1575	0.1148	0.0074	0.0123
	118	TTGGGCCGGAGCGAGGTATGATGCCATCCTTCACAGCTCCAGCA	0	8891	2156	150	416	0	0.1542	0.1073	0.0108	0.0101
	119	TCGGGTCGGAGCGAGGTATGATGCCATCCTTCACAGCTCCAGCA	1	8341	1830	70	410	0	0.1447	0.091	0.0051	0.01
