# Supplementary material for: Dynamic changes in DNA populations revealed by split–combine selection
Source: Royal Society of Chemistry journal article supplement (doi:10.1039/d0sc01952f), 2020-01-01
Supplement: d0sc01952f4.xlsx [file d0sc01952f4.xlsx]

## Sheet: Split-combine C6, C8
			Copy number		Frequency [%]
Clickmer	No	SEQUENCE (RANDOM REGION)	C6	C8	C6	C8
P2	49	GGGTCATGCCGGGTTGGAGTTTAAGGGGTTGGGGCAGGACCC	11442129	992384	32.4287	21.7727
	72	TGGCGATTATGGGGAGATGGGTGGTGGGGCAGGTCCCGACA	374001	81121	1.06	1.7798
	74	TGGCGGTTATGGGGAGATGGGTGGTGGGGCAGGTCCCGACA	421282	77601	1.194	1.7026
	46	GGGTCATGCCGGGTTGGAGTTTAAGGGGTTGGGGCAAGACCC	775947	65556	2.1991	1.4383
	47	GGGTCATGCCGGGTTGGAGTTTAAGGGGTTGGGGCAGAACCC	857328	61805	2.4298	1.356
	32	GGATGGCGGTTATGGGGAGATGGGTGGTGGGGCAGGTCCCG	331776	58080	0.9403	1.2743
	30	GGATGGCGATTATGGGGAGATGGGTGGTGGGGCAGGTCCCG	291732	57866	0.8268	1.2696
	14	CCCCCCCCCCCCCCCCCCCCCCCCCCCCCCCCCCCCCCCCCG	228884	55911	0.6487	1.2267
	11	AGGGGCGCTTTGGGGGAAATATGGGAGGTGGGGGGGGTCCCG	113071	49772	0.3205	1.092
	61	TGAACGGGAGGGTGGGAGGTTGCGGGTATGAGGGGCCCGTTG	91872	48961	0.2604	1.0742
	45	GGGTCATGCCGGGTTGGAGTTTAAGGGGTTGGGACAGGACCC	592429	47654	1.679	1.0455
	41	GGGTCATGCCGGGTTGGAGTTTAAGAGGTTGGGGCAGGACCC	317536	47343	0.8999	1.0387
	69	TGGCGACTATGGGGAAATGGGTGGTGGGGCAGGTCCCGACA	390019	41680	1.1054	0.9145
	71	TGGCGATTATGGGGAAATGGGTGGTGGGGCAGGTCCCGACA	215960	37501	0.6121	0.8228
	57	GGGTCATGTCGGGTTGGAGTTTAAGGGGTTGGGGCAGGACCC	396670	33513	1.1242	0.7353
	5	AGGGACGCTTTGGGGGGAATGTGGGAGGTGGGGGGGGTCCCG	136099	31151	0.3857	0.6834
	64	TGGCAATTATGGGGAGATGGGTGGTGGGGCAGGTCCCGACA	142412	29830	0.4036	0.6545
	73	TGGCGGTTATGGGGAAATGGGTGGTGGGGCAGGTCCCGACA	175848	29029	0.4984	0.6369
	21	GGATCATGCCGGGTTGGAGTTTAAGGGGTTGGGGCAGGACCC	418400	28546	1.1858	0.6263
	27	GGATGGCGACTATGGGGAAATGGGTGGTGGGGCAGGTCCCG	291068	28499	0.8249	0.6253
	33	GGGCCATGCCGGGTTGGAGTTTAAGGGGTTGGGGCAGGACCC	307246	27004	0.8708	0.5925
	9	AGGGGCACTTTGGGGGAAATATGGGAGGTGGGGGGGGTCCCG	35052	26792	0.0993	0.5878
	66	TGGCAGTTATGGGGAGATGGGTGGTGGGGCAGGTCCCGACA	112056	26012	0.3176	0.5707
	29	GGATGGCGATTATGGGGAAATGGGTGGTGGGGCAGGTCCCG	164989	25907	0.4676	0.5684
	6	AGGGGACACTTTGGGGGACTATGGGAGGTGGGGGGAGACCCG	118178	23370	0.3349	0.5127
	23	GGATGGCAATTATGGGGAGATGGGTGGTGGGGCAGGTCCCG	110608	21336	0.3135	0.4681
	55	GGGTCATGCCGGGTTGGAGTTTAAGGGGTTGGGGTAGGACCC	303734	21076	0.8608	0.4624
	31	GGATGGCGGTTATGGGGAAATGGGTGGTGGGGCAGGTCCCG	136672	20838	0.3873	0.4572
	68	TGGCGAATATGGGGAGATGGGTGGTGGGGCAGGTCCCGACA	87235	20098	0.2472	0.4409
	20	GGACGGGCAAGATGGCTTCGGGGCTTGGGCGTTTTAAGGGGA	40372	19498	0.1144	0.4278
	15	CGGACGGGAGGGTGGGTTGGGTGGGTCTTACAAGGGGCCAGG	41960	19304	0.1189	0.4235
	24	GGATGGCAGTTATGGGGAGATGGGTGGTGGGGCAGGTCCCG	88250	19140	0.2501	0.4199
	3	AGGGACGCTTTGGGGGAAATATGGGAGGTGGGGGGGGTCCCG	33852	17062	0.0959	0.3743
	18	GCGGTACGGTTTGACCGTCCGAAGAGCTTCAAGCGATTGAGG	112965	16623	0.3202	0.3647
	4	AGGGACGCTTTGGGGGAAATGTGGGAGGTGGGGGGGGTCCCG	46960	16008	0.1331	0.3512
	54	GGGTCATGCCGGGTTGGAGTTTAAGGGGTTGGGGCATGACCC	139629	15582	0.3957	0.3419
	26	GGATGGCGAATATGGGGAGATGGGTGGTGGGGCAGGTCCCG	63645	13257	0.1804	0.2909
	51	GGGTCATGCCGGGTTGGAGTTTAAGGGGTTGGGGCAGGACTC	214734	12778	0.6086	0.2803
	60	TGAACGGGAGGGTGGGAGGTTGCGGGTATAAGGGGCCCGTTG	79083	12547	0.2241	0.2753
	8	AGGGGCACTTTGGGGGAAATATGGGAGGTGGGGGGGGCCCCG	31526	12121	0.0893	0.2659
	17	GAGTCATGCCGGGTTGGAGTTTAAGGGGTTGGGGCAGGACCC	201664	12048	0.5715	0.2643
	37	GGGTCATGCCGGATTGGAGTTTAAGGGGTTGGGGCAGGACCC	161981	11880	0.4591	0.2606
	16	GAGGGTAGGGTGGGTGGGATATATAGGGGCCCTCAGGGTCCG	31167	11751	0.0883	0.2578
	43	GGGTCATGCCGGGTTGGAGTTTAAGGGATTGGGGCAGGACCC	157018	11438	0.445	0.2509
	2	AGGGACGCTTTGGGGGAAATATGGGAGGTGGGGGGGGCCCCG	63011	11398	0.1786	0.2501
I2	19	GCGGTACGGTTTGACCGTCCGAAGAGCTTTAAGCGATTGAGG	25710	11343	0.0729	0.2489
	63	TGGCAATTATGGGGAAATGGGTGGTGGGGCAGGTCCCGACA	67559	11177	0.1915	0.2452
	36	GGGTCATGCCGAGTTGGAGTTTAAGGGGTTGGGGCAGGACCC	176993	10915	0.5016	0.2395
	50	GGGTCATGCCGGGTTGGAGTTTAAGGGGTTGGGGCAGGACCT	137888	10822	0.3908	0.2374
	1	AGGGACACTTTGGGGGGAATGTGGGAGGTGGGGGGGGTCCCG	40290	10190	0.1142	0.2236
	13	AGGTCATGCCGGGTTGGAGTTTAAGGGGTTGGGGCAGGACCC	125267	10007	0.355	0.2196
	67	TGGCGAATATGGGGAAATGGGTGGTGGGGCAGGTCCCGACA	47420	9839	0.1344	0.2159
	58	GGTCATGCCGGGTTGGAGTTTAAGGGGTTGGGGCAGGACCCA	96367	9545	0.2731	0.2094
	39	GGGTCATGCCGGGTTGGAATTTAAGGGGTTGGGGCAGGACCC	163734	9283	0.464	0.2037
	42	GGGTCATGCCGGGTTGGAGTTTAAGGAGTTGGGGCAGGACCC	145739	8621	0.413	0.1891
	56	GGGTCATGCTGGGTTGGAGTTTAAGGGGTTGGGGCAGGACCC	146587	8539	0.4154	0.1873
	70	TGGCGACTATGGGGAGATGGGTGGTGGGGCAGGTCCCGACA	134181	8491	0.3803	0.1863
	22	GGATGGCAATTATGGGGAAATGGGTGGTGGGGCAGGTCCCG	50678	7742	0.1436	0.1699
	52	GGGTCATGCCGGGTTGGAGTTTAAGGGGTTGGGGCAGGATCC	116944	7508	0.3314	0.1647
	10	AGGGGCGCTTTGGGGGAAATATGGGAGGTGGGGGGGGCCCCG	43943	6621	0.1245	0.1453
	35	GGGTCATACCGGGTTGGAGTTTAAGGGGTTGGGGCAGGACCC	119125	6391	0.3376	0.1402
	65	TGGCAGTTATGGGGAAATGGGTGGTGGGGCAGGTCCCGACA	27914	6363	0.0791	0.1396
	12	AGGGTTAAATGGGGGAAATTGGGTGGTGGGGGAGGGGGCACG	154495	6353	0.4379	0.1394
	25	GGATGGCGAATATGGGGAAATGGGTGGTGGGGCAGGTCCCG	33815	6341	0.0958	0.1391
	48	GGGTCATGCCGGGTTGGAGTTTAAGGGGTTGGGGCAGGACCA	67368	6335	0.1909	0.139
	40	GGGTCATGCCGGGTTGGAGTTTAAGAGGTTGGGGCAGAACCC	41926	6222	0.1188	0.1365
	7	AGGGGACACTTTGGGGGGTTATGGGAGGTGGGGGGAGACCCG	38881	6180	0.1102	0.1356
	28	GGATGGCGACTATGGGGAGATGGGTGGTGGGGCAGGTCCCG	103011	6005	0.2919	0.1317
	44	GGGTCATGCCGGGTTGGAGTTTAAGGGGTTGGAGCAGGACCC	102997	5992	0.2919	0.1315
	38	GGGTCATGCCGGGTTGAAGTTTAAGGGGTTGGGGCAGGACCC	102438	5161	0.2903	0.1132
	34	GGGTAGGGTGGGATGGGTTTTAGGGGAGGAGGAGGGGCCCCG	54018	5002	0.1531	0.1097
	62	TGGCAACTATGGGGAGATGGGTGGTGGGGCAGGTCCCGACA	53818	4818	0.1525	0.1057
	53	GGGTCATGCCGGGTTGGAGTTTAAGGGGTTGGGGCAGTACCC	46275	4663	0.1312	0.1023
	59	GGTGGAGGTGGGTTTGAGAGAGAGGGGTGGTAGGATGGGGTT	57190	4514	0.1621	0.099

## Sheet: In-dU C9, C10
			Copy number				Frequency [%]
Clickmer	No	SEQUENCE (RANDOM REGION)	C6	C8	C9	C10	C6	C8	C9	C10
I2	41	GCGGTACGGTTTGACCGTCCGAAGAGCTTTAAGCGATTGAGG	25710	11343	10402	17995	0.0729	0.2489	2.5366	7.804
P2	83	GGGTCATGCCGGGTTGGAGTTTAAGGGGTTGGGGCAGGACCC	11442129	992384	59940	15796	32.4287	21.7727	14.6168	6.8504
	62	GGCGGGCGTTTTGCGCCCGAGTGTTAACGACACAAGGGACCA	2791	3214	4267	10933	0.0079	0.0705	1.0405	4.7414
	64	GGCGGGCGTTTTGCGCCCGAGTGTTAACGACGCAAGGGACCA	1141	1650	2636	7896	0.0032	0.0362	0.6428	3.4243
	44	GCGGTACGGTTTTGACCGTCCGAAGAGCTTCAAGCGATTGAG	1901	1902	2703	7596	0.0054	0.0417	0.6591	3.2942
	40	GCGGTACGGTTTGACCGTCCGAAGAGCTTCAAGCGATTGAGG	112965	16623	7635	7174	0.3202	0.3647	1.8618	3.1112
	42	GCGGTACGGTTTTACCGTCCGAAGAGCTTCAAGCGATTGAGG	7143	3053	3049	5663	0.0202	0.067	0.7435	2.4559
	66	GGGCGGGCAAGATGGCTTCGGGGCTTGGGCGTTTTAAGGGGA	5545	5519	3672	5068	0.0157	0.1211	0.8954	2.1979
	45	GCGGTACGGTTTTGACCGTCCGAAGAGCTTCAAGCGATTGAGG	1281	1314	1888	4903	0.0036	0.0288	0.4604	2.1263
	47	GGACGGGCAAGATGGCTTCGGGGCTTGGGCGTTTTAAGGGGA	40372	19498	6151	3711	0.1144	0.4278	1.5	1.6094
	13	AGGGCGAGGTGGCAAAGTCTTGGGGAGAATTGGGTGGTGGGG	24107	12997	3967	2650	0.0683	0.2852	0.9674	1.1492
	22	AGGGGCGCTTTGGGGGAAATATGGGAGGTGGGGGGGGTCCCG	113071	49772	6014	2502	0.3205	1.092	1.4666	1.0851
	96	TGAACGGGAGGGTGGGAGGTTGCGGGTATGAGGGGCCCGTTG	91872	48961	5587	2364	0.2604	1.0742	1.3624	1.0252
	97	TGACGGGCAAGATGGCTTCGGGGCTTGGGCGTTTTAAGGGGA	3061	2709	1795	2266	0.0087	0.0594	0.4377	0.9827
	43	GCGGTACGGTTTTACCGTCCGAAGAGCTTTAAGCGATTGAGG	900	573	904	1932	0.0026	0.0126	0.2204	0.8379
	46	GCGGTACGGTTTTGACCGTCCGAAGAGCTTTAAGCGATTGAG	181	301	523	1773	0.0005	0.0066	0.1275	0.7689
	61	GGCGGGCGTTTTGCGCCCGAGTGTTAACGACACAAGGAACCA	290	428	655	1697	0.0008	0.0094	0.1597	0.736
	19	AGGGGCACTTTGGGGGAAATATGGGAGGTGGGGGGGGTCCCG	35052	26792	3525	1680	0.0993	0.5878	0.8596	0.7286
	15	AGGGCGAGGTGGCAAAGTTTTGGGGAGAATTGGGTGGTGGGG	5394	4638	1969	1556	0.0153	0.1018	0.4802	0.6748
	38	GCGATACGGTTTGACCGTCCGAAGAGCTTTAAGCGATTGAGG	2421	863	887	1403	0.0069	0.0189	0.2163	0.6084
	10	AGGGACGCTTTGGGGGGAATTTGGGAGGTGGGGGGGGTCCCG	19494	17626	2760	1271	0.0552	0.3867	0.673	0.5512
	27	CCCCCCCCCCCCCCCCCCCCCCCCCCCCCCCCCCCCCCCCCG	228884	55911	5471	1268	0.6487	1.2267	1.3341	0.5499
	80	GGGTCATGCCGGGTTGGAGTTTAAGGGGTTGGGGCAAGACCC	775947	65556	4213	1220	2.1991	1.4383	1.0274	0.5291
	12	AGGGCGAGGTGGCAAAGTCTTGGGGAAAATTGGGTGGTGGGG	8276	5110	1738	1153	0.0235	0.1121	0.4238	0.5
	63	GGCGGGCGTTTTGCGCCCGAGTGTTAACGACGCAAGGAACCA	141	251	423	1119	0.0004	0.0055	0.1032	0.4853
	81	GGGTCATGCCGGGTTGGAGTTTAAGGGGTTGGGGCAGAACCC	857328	61805	4039	946	2.4298	1.356	0.9849	0.4103
	33	CGGACGGGAGGGTGGGTTGGGTGGGTTTTACAAGGGGCCAGG	5931	7487	1229	896	0.0168	0.1643	0.2997	0.3886
	110	TGGCGGTTATGGGGAGATGGGTGGTGGGGCAGGTCCCGACA	421282	77601	3979	870	1.194	1.7026	0.9703	0.3773
	37	GCGATACGGTTTGACCGTCCGAAGAGCTTCAAGCGATTGAGG	12385	1684	915	827	0.0351	0.0369	0.2231	0.3587
	75	GGGTCATGCCGGGTTGGAGTTTAAGAGGTTGGGGCAGGACCC	317536	47343	2699	783	0.8999	1.0387	0.6582	0.3396
	59	GGATGGCGGTTATGGGGAGATGGGTGGTGGGGCAGGTCCCG	331776	58080	2974	694	0.9403	1.2743	0.7252	0.301
	79	GGGTCATGCCGGGTTGGAGTTTAAGGGGTTGGGACAGGACCC	592429	47654	2987	644	1.679	1.0455	0.7284	0.2793
	108	TGGCGATTATGGGGAGATGGGTGGTGGGGCAGGTCCCGACA	374001	81121	3477	595	1.06	1.7798	0.8479	0.258
	48	GGATCATGCCGGGTTGGAGTTTAAGGGGTTGGGGCAGGACCC	418400	28546	2120	574	1.1858	0.6263	0.517	0.2489
	1	AGACGGGCAAGATGGCTTCGGGGCTTGGGCGTTTTAAGGGGA	2275	1429	670	528	0.0064	0.0314	0.1634	0.229
	68	GGGTAGGGTGGGTTGGGTTTCAAAGGAGGAGGAGGGGCCCCG	9219	10741	1078	518	0.0261	0.2357	0.2629	0.2246
	9	AGGGACGCTTTGGGGGGAATGTGGGAGGTGGGGGGGGTCCCG	136099	31151	2076	504	0.3857	0.6834	0.5062	0.2186
	65	GGGCCATGCCGGGTTGGAGTTTAAGGGGTTGGGGCAGGACCC	307246	27004	1782	502	0.8708	0.5925	0.4346	0.2177
	7	AGGGACGCTTTGGGGGAAATGTGGGAGGTGGGGGGGGTCCCG	46960	16008	1383	479	0.1331	0.3512	0.3373	0.2077
	91	GGGTCATGTCGGGTTGGAGTTTAAGGGGTTGGGGCAGGACCC	396670	33513	1872	465	1.1242	0.7353	0.4565	0.2017
	57	GGATGGCGATTATGGGGAGATGGGTGGTGGGGCAGGTCCCG	291732	57866	2540	457	0.8268	1.2696	0.6194	0.1982
	6	AGGGACGCTTTGGGGGAAATATGGGAGGTGGGGGGGGTCCCG	33852	17062	1394	447	0.0959	0.3743	0.3399	0.1939
	39	GCGGTACGGTTTAACCGTCCGAAGAGCTTCAAGCGATTGAGG	3866	765	420	438	0.011	0.0168	0.1024	0.19
	14	AGGGCGAGGTGGCAAAGTTTTGGGGAAAATTGGGTGGTGGGG	1757	1543	651	390	0.005	0.0339	0.1588	0.1691
	34	GAGGGAAGGGGATTGGTGGGTTTGTGGGACGGGGGCACCTCC	19578	5485	820	376	0.0555	0.1203	0.2	0.1631
	8	AGGGACGCTTTGGGGGAAATTTGGGAGGTGGGGGGGGTCCCG	4187	4740	751	369	0.0119	0.104	0.1831	0.16
	11	AGGGCAAGGTGGCAAAGTCTTGGGGAGAATTGGGTGGTGGGG	1812	1352	423	331	0.0051	0.0297	0.1032	0.1435
	32	CGGACGGGAGGGTGGGTTGGGTGGGTCTTACAAGGGGCCAGG	41960	19304	1128	303	0.1189	0.4235	0.2751	0.1314
	4	AGGGACACTTTGGGGGGAATTTGGGAGGTGGGGGGGGTCCCG	4570	4978	726	297	0.013	0.1092	0.177	0.1288
	30	CGGACGGGAGGGTGGGTTGGGTGGGTATTACGAGGGGCCAGG	8467	6817	604	297	0.024	0.1496	0.1473	0.1288
	89	GGGTCATGCCGGGTTGGAGTTTAAGGGGTTGGGGTAGGACCC	303734	21076	1392	294	0.8608	0.4624	0.3394	0.1275
	102	TGGCAGTTATGGGGAGATGGGTGGTGGGGCAGGTCCCGACA	112056	26012	1282	289	0.3176	0.5707	0.3126	0.1253
	23	AGGGGCGCTTTGGGGGAAATTTGGGAGGTGGGGGGGGTCCCG	3754	2819	511	284	0.0106	0.0618	0.1246	0.1232
	31	CGGACGGGAGGGTGGGTTGGGTGGGTATTACTAGGGGCCAGG	9174	6265	650	281	0.026	0.1375	0.1585	0.1219
	29	CCCCCCCCCCCCCCCCCCCCCCCCCCCCCCCCCCCGCCCCCG	21620	6735	687	275	0.0613	0.1478	0.1675	0.1193
	88	GGGTCATGCCGGGTTGGAGTTTAAGGGGTTGGGGCATGACCC	139629	15582	997	246	0.3957	0.3419	0.2431	0.1067
	109	TGGCGGTTATGGGGAAATGGGTGGTGGGGCAGGTCCCGACA	175848	29029	1275	245	0.4984	0.6369	0.3109	0.1063
	84	GGGTCATGCCGGGTTGGAGTTTAAGGGGTTGGGGCAGGACCT	137888	10822	844	240	0.3908	0.2374	0.2058	0.1041
	85	GGGTCATGCCGGGTTGGAGTTTAAGGGGTTGGGGCAGGACTC	214734	12778	1058	240	0.6086	0.2803	0.258	0.1041
	95	TGAACGGGAGGGTGGGAGGTTGCGGGTATGAGGGGCCCGTTA	4853	3444	571	240	0.0138	0.0756	0.1392	0.1041
	100	TGGCAATTATGGGGAGATGGGTGGTGGGGCAGGTCCCGACA	142412	29830	1307	226	0.4036	0.6545	0.3187	0.098
	51	GGATGGCAGTTATGGGGAGATGGGTGGTGGGGCAGGTCCCG	88250	19140	1048	212	0.2501	0.4199	0.2556	0.0919
	24	AGGGGCGCTTTGGGGGGAATTTGGGAGGTGGGGGGGGTCCCG	7799	3322	471	206	0.0221	0.0729	0.1149	0.0893
	2	AGGGACACTTTGGGGGAAATATGGGAGGTGGGGGGGGTCCCG	8057	6161	599	200	0.0228	0.1352	0.1461	0.0867
	20	AGGGGCGCTTTGGGGGAAATATGGGAGGTGGGGGAGGTCCCG	9764	5722	604	198	0.0277	0.1255	0.1473	0.0859
	16	AGGGGACACTTTGGGGGACTATGGGAGGTGGGGGGAGACCCG	118178	23370	1954	197	0.3349	0.5127	0.4765	0.0854
	36	GAGTCATGCCGGGTTGGAGTTTAAGGGGTTGGGGCAGGACCC	201664	12048	937	190	0.5715	0.2643	0.2285	0.0824
	104	TGGCGAATATGGGGAGATGGGTGGTGGGGCAGGTCCCGACA	87235	20098	1004	190	0.2472	0.4409	0.2448	0.0824
	107	TGGCGATTATGGGGAAATGGGTGGTGGGGCAGGTCCCGACA	215960	37501	1323	188	0.6121	0.8228	0.3226	0.0815
	35	GAGGGTAGGGTGGGTGGGATATATAGGGGCCCTCAGGGTCCG	31167	11751	580	180	0.0883	0.2578	0.1414	0.0781
	94	TGAACGGGAGGGTGGGAGGTTGCGGGTATAAGGGGCCCGTTG	79083	12547	819	179	0.2241	0.2753	0.1997	0.0776
	28	CCCCCCCCCCCCCCCCCCCCCCCCCCCCCCCCCCCCCTCCCG	20479	6211	643	175	0.058	0.1363	0.1568	0.0759
	58	GGATGGCGGTTATGGGGAAATGGGTGGTGGGGCAGGTCCCG	136672	20838	983	166	0.3873	0.4572	0.2397	0.072
	50	GGATGGCAATTATGGGGAGATGGGTGGTGGGGCAGGTCCCG	110608	21336	997	165	0.3135	0.4681	0.2431	0.0716
	92	GGTCATGCCGGGTTGGAGTTTAAGGGGTTGGGGCAGGACCCA	96367	9545	643	162	0.2731	0.2094	0.1568	0.0703
	71	GGGTCATGCCGGATTGGAGTTTAAGGGGTTGGGGCAGGACCC	161981	11880	735	155	0.4591	0.2606	0.1792	0.0672
	26	AGGTCATGCCGGGTTGGAGTTTAAGGGGTTGGGGCAGGACCC	125267	10007	709	154	0.355	0.2196	0.1729	0.0668
	70	GGGTCATGCCGAGTTGGAGTTTAAGGGGTTGGGGCAGGACCC	176993	10915	862	154	0.5016	0.2395	0.2102	0.0668
	82	GGGTCATGCCGGGTTGGAGTTTAAGGGGTTGGGGCAGGACCA	67368	6335	456	143	0.1909	0.139	0.1112	0.062
	74	GGGTCATGCCGGGTTGGAGTTTAAGAGGTTGGGGCAGAACCC	41926	6222	490	142	0.1188	0.1365	0.1195	0.0616
	53	GGATGGCGAATATGGGGAGATGGGTGGTGGGGCAGGTCCCG	63645	13257	708	139	0.1804	0.2909	0.1727	0.0603
	111	TGGCGGTTTTGGGGAGATGGGTGGTGGGGCAGGTCCCGACA	19198	6039	503	137	0.0544	0.1325	0.1227	0.0594
	90	GGGTCATGCTGGGTTGGAGTTTAAGGGGTTGGGGCAGGACCC	146587	8539	694	132	0.4154	0.1873	0.1692	0.0572
	73	GGGTCATGCCGGGTTGGAATTTAAGGGGTTGGGGCAGGACCC	163734	9283	740	130	0.464	0.2037	0.1805	0.0564
	87	GGGTCATGCCGGGTTGGAGTTTAAGGGGTTGGGGCAGTACCC	46275	4663	444	130	0.1312	0.1023	0.1083	0.0564
	77	GGGTCATGCCGGGTTGGAGTTTAAGGGATTGGGGCAGGACCC	157018	11438	675	127	0.445	0.2509	0.1646	0.0551
	60	GGATGGCGGTTTTGGGGAGATGGGTGGTGGGGCAGGTCCCG	17158	5253	416	126	0.0486	0.1152	0.1014	0.0546
	76	GGGTCATGCCGGGTTGGAGTTTAAGGAGTTGGGGCAGGACCC	145739	8621	648	125	0.413	0.1891	0.158	0.0542
	56	GGATGGCGATTATGGGGAAATGGGTGGTGGGGCAGGTCCCG	164989	25907	964	124	0.4676	0.5684	0.2351	0.0538
	3	AGGGACACTTTGGGGGGAATGTGGGAGGTGGGGGGGGTCCCG	40290	10190	526	122	0.1142	0.2236	0.1283	0.0529
	105	TGGCGACTATGGGGAAATGGGTGGTGGGGCAGGTCCCGACA	390019	41680	1048	115	1.1054	0.9145	0.2556	0.0499
	86	GGGTCATGCCGGGTTGGAGTTTAAGGGGTTGGGGCAGGATCC	116944	7508	590	106	0.3314	0.1647	0.1439	0.046
	69	GGGTCATACCGGGTTGGAGTTTAAGGGGTTGGGGCAGGACCC	119125	6391	550	95	0.3376	0.1402	0.1341	0.0412
	78	GGGTCATGCCGGGTTGGAGTTTAAGGGGTTGGAGCAGGACCC	102997	5992	477	93	0.2919	0.1315	0.1163	0.0403
	18	AGGGGCACTTTGGGGGAAATATGGGAGGTGGGGGGGGCCCCG	31526	12121	599	89	0.0893	0.2659	0.1461	0.0386
	103	TGGCGAATATGGGGAAATGGGTGGTGGGGCAGGTCCCGACA	47420	9839	419	77	0.1344	0.2159	0.1022	0.0334
	54	GGATGGCGACTATGGGGAAATGGGTGGTGGGGCAGGTCCCG	291068	28499	726	71	0.8249	0.6253	0.177	0.0308
	72	GGGTCATGCCGGGTTGAAGTTTAAGGGGTTGGGGCAGGACCC	102438	5161	474	60	0.2903	0.1132	0.1156	0.026
	52	GGATGGCGAATATGGGGAAATGGGTGGTGGGGCAGGTCCCG	33815	6341	267	57	0.0958	0.1391	0.0651	0.0247
	99	TGGCAATTATGGGGAAATGGGTGGTGGGGCAGGTCCCGACA	67559	11177	430	51	0.1915	0.2452	0.1049	0.0221
	49	GGATGGCAATTATGGGGAAATGGGTGGTGGGGCAGGTCCCG	50678	7742	309	45	0.1436	0.1699	0.0754	0.0195
	101	TGGCAGTTATGGGGAAATGGGTGGTGGGGCAGGTCCCGACA	27914	6363	310	44	0.0791	0.1396	0.0756	0.0191
	21	AGGGGCGCTTTGGGGGAAATATGGGAGGTGGGGGGGGCCCCG	43943	6621	235	41	0.1245	0.1453	0.0573	0.0178
	5	AGGGACGCTTTGGGGGAAATATGGGAGGTGGGGGGGGCCCCG	63011	11398	304	34	0.1786	0.2501	0.0741	0.0147
	17	AGGGGACACTTTGGGGGGTTATGGGAGGTGGGGGGAGACCCG	38881	6180	278	23	0.1102	0.1356	0.0678	0.01
	106	TGGCGACTATGGGGAGATGGGTGGTGGGGCAGGTCCCGACA	134181	8491	144	17	0.3803	0.1863	0.0351	0.0074
	67	GGGTAGGGTGGGATGGGTTTTAGGGGAGGAGGAGGGGCCCCG	54018	5002	133	15	0.1531	0.1097	0.0324	0.0065
	93	GGTGGAGGTGGGTTTGAGAGAGAGGGGTGGTAGGATGGGGTT	57190	4514	161	13	0.1621	0.099	0.0393	0.0056
	98	TGGCAACTATGGGGAGATGGGTGGTGGGGCAGGTCCCGACA	53818	4818	109	12	0.1525	0.1057	0.0266	0.0052
	55	GGATGGCGACTATGGGGAGATGGGTGGTGGGGCAGGTCCCG	103011	6005	105	11	0.2919	0.1317	0.0256	0.0048
	25	AGGGTTAAATGGGGGAAATTGGGTGGTGGGGGAGGGGGCACG	154495	6353	70	4	0.4379	0.1394	0.0171	0.0017

## Sheet: Phe-dU C9, C10
			Copy number				Frequency [%]
Clickmer	No	SEQUENCE (RANDOM REGION)	C6	C8	C9	C10	C6	C8	C9	C10
P2	76	GGGTCATGCCGGGTTGGAGTTTAAGGGGTTGGGGCAGGACCC	11442129	992384	1143132	4418053	32.4287	21.7727	19.2486	20.9863
	26	AGGGGCGCTTTGGGGGAAATATGGGAGGTGGGGGGGGTCCCG	113071	49772	87477	458520	0.3205	1.092	1.473	2.178
	22	AGGGGCACTTTGGGGGAAATATGGGAGGTGGGGGGGGTCCCG	35052	26792	53308	305276	0.0993	0.5878	0.8976	1.4501
	32	CCCCCCCCCCCCCCCCCCCCCCCCCCCCCCCCCCCCCCCCCG	228884	55911	67682	279365	0.6487	1.2267	1.1397	1.327
	103	TGGCGATTATGGGGAGATGGGTGGTGGGGCAGGTCCCGACA	374001	81121	88740	261491	1.06	1.7798	1.4942	1.2421
	92	TGAACGGGAGGGTGGGAGGTTGCGGGTATGAGGGGCCCGTTG	91872	48961	61827	219802	0.2604	1.0742	1.0411	1.0441
	68	GGGTCATGCCGGGTTGGAGTTTAAGAGGTTGGGGCAGGACCC	317536	47343	53155	213960	0.8999	1.0387	0.895	1.0163
	105	TGGCGGTTATGGGGAGATGGGTGGTGGGGCAGGTCCCGACA	421282	77601	75820	209818	1.194	1.7026	1.2767	0.9967
	73	GGGTCATGCCGGGTTGGAGTTTAAGGGGTTGGGGCAAGACCC	775947	65556	68017	206708	2.1991	1.4383	1.1453	0.9819
	53	GGATGGCGATTATGGGGAGATGGGTGGTGGGGCAGGTCCCG	291732	57866	66261	201704	0.8268	1.2696	1.1157	0.9581
	6	AGGGACGCTTTGGGGGAAATATGGGAGGTGGGGGGGGTCCCG	33852	17062	33693	194530	0.0959	0.3743	0.5673	0.924
	13	AGGGACGCTTTGGGGGGAATTTGGGAGGTGGGGGGGGTCCCG	19494	17626	33624	188459	0.0552	0.3867	0.5662	0.8952
	55	GGATGGCGGTTATGGGGAGATGGGTGGTGGGGCAGGTCCCG	331776	58080	59061	163984	0.9403	1.2743	0.9945	0.7789
	72	GGGTCATGCCGGGTTGGAGTTTAAGGGGTTGGGACAGGACCC	592429	47654	51890	161753	1.679	1.0455	0.8737	0.7683
	74	GGGTCATGCCGGGTTGGAGTTTAAGGGGTTGGGGCAGAACCC	857328	61805	58263	156287	2.4298	1.356	0.9811	0.7424
	102	TGGCGATTATGGGGAAATGGGTGGTGGGGCAGGTCCCGACA	215960	37501	45277	137062	0.6121	0.8228	0.7624	0.6511
	85	GGGTCATGTCGGGTTGGAGTTTAAGGGGTTGGGGCAGGACCC	396670	33513	37174	135139	1.1242	0.7353	0.626	0.6419
	100	TGGCGACTATGGGGAAATGGGTGGTGGGGCAGGTCCCGACA	390019	41680	41895	120546	1.1054	0.9145	0.7054	0.5726
	39	GAGGGTAGGGTGGGTGGGATATATAGGGGCCCTCAGGGTCCG	31167	11751	22192	119710	0.0883	0.2578	0.3737	0.5686
	99	TGGCGAATATGGGGAGATGGGTGGTGGGGCAGGTCCCGACA	87235	20098	27432	113849	0.2472	0.4409	0.4619	0.5408
	52	GGATGGCGATTATGGGGAAATGGGTGGTGGGGCAGGTCCCG	164989	25907	33665	103110	0.4676	0.5684	0.5669	0.4898
	8	AGGGACGCTTTGGGGGAAATTTGGGAGGTGGGGGGGGTCCCG	4187	4740	13590	100186	0.0119	0.104	0.2288	0.4759
	7	AGGGACGCTTTGGGGGAAATGTGGGAGGTGGGGGGGGTCCCG	46960	16008	22617	96886	0.1331	0.3512	0.3808	0.4602
	81	GGGTCATGCCGGGTTGGAGTTTAAGGGGTTGGGGCATGACCC	139629	15582	20143	94347	0.3957	0.3419	0.3392	0.4482
	104	TGGCGGTTATGGGGAAATGGGTGGTGGGGCAGGTCCCGACA	175848	29029	32236	92473	0.4984	0.6369	0.5428	0.4393
	11	AGGGACGCTTTGGGGGGAATGTGGGAGGTGGGGGGGGTCCCG	136099	31151	29116	91068	0.3857	0.6834	0.4903	0.4326
	50	GGATGGCGACTATGGGGAAATGGGTGGTGGGGCAGGTCCCG	291068	28499	29981	89030	0.8249	0.6253	0.5048	0.4229
	1	AGGGACACTTTGGGGGAAATATGGGAGGTGGGGGGGGTCCCG	8057	6161	14659	88617	0.0228	0.1352	0.2468	0.4209
	95	TGGCAATTATGGGGAGATGGGTGGTGGGGCAGGTCCCGACA	142412	29830	32270	86987	0.4036	0.6545	0.5434	0.4132
	82	GGGTCATGCCGGGTTGGAGTTTAAGGGGTTGGGGTAGGACCC	303734	21076	26427	82999	0.8608	0.4624	0.445	0.3943
	49	GGATGGCGAATATGGGGAGATGGGTGGTGGGGCAGGTCCCG	63645	13257	19560	82133	0.1804	0.2909	0.3294	0.3901
	60	GGGTAGGGTGGGTTGGGTTTCAAAGGAGGAGGAGGGGCCCCG	9219	10741	19465	74579	0.0261	0.2357	0.3278	0.3543
	18	AGGGCGAGGTGGCAAAGTTTTGGGGAGAATTGGGTGGTGGGG	5394	4638	14031	73366	0.0153	0.1018	0.2363	0.3485
	98	TGGCGAATATGGGGAAATGGGTGGTGGGGCAGGTCCCGACA	47420	9839	16254	72619	0.1344	0.2159	0.2737	0.3449
	44	GGATCATGCCGGGTTGGAGTTTAAGGGGTTGGGGCAGGACCC	418400	28546	30369	72047	1.1858	0.6263	0.5114	0.3422
	54	GGATGGCGGTTATGGGGAAATGGGTGGTGGGGCAGGTCCCG	136672	20838	24112	70113	0.3873	0.4572	0.406	0.333
	57	GGGCCATGCCGGGTTGGAGTTTAAGGGGTTGGGGCAGGACCC	307246	27004	25691	68237	0.8708	0.5925	0.4326	0.3241
	46	GGATGGCAATTATGGGGAGATGGGTGGTGGGGCAGGTCCCG	110608	21336	24088	67482	0.3135	0.4681	0.4056	0.3205
	4	AGGGACACTTTGGGGGGAATTTGGGAGGTGGGGGGGGTCCCG	4570	4978	10745	63742	0.013	0.1092	0.1809	0.3028
	16	AGGGCGAGGTGGCAAAGTCTTGGGGAGAATTGGGTGGTGGGG	24107	12997	20822	63585	0.0683	0.2852	0.3506	0.302
	97	TGGCAGTTATGGGGAGATGGGTGGTGGGGCAGGTCCCGACA	112056	26012	23530	60018	0.3176	0.5707	0.3962	0.2851
	24	AGGGGCGCTTTGGGGGAAATATGGGAGGTGGGGGAGGTCCCG	9764	5722	11483	59585	0.0277	0.1255	0.1934	0.283
	66	GGGTCATGCCGGGTTGGAATTTAAGGGGTTGGGGCAGGACCC	163734	9283	19069	54729	0.464	0.2037	0.3211	0.26
	28	AGGGGCGCTTTGGGGGAAATTTGGGAGGTGGGGGGGGTCCCG	3754	2819	7682	53790	0.0106	0.0618	0.1294	0.2555
	48	GGATGGCGAATATGGGGAAATGGGTGGTGGGGCAGGTCCCG	33815	6341	11041	51248	0.0958	0.1391	0.1859	0.2434
	88	GGTCATGCCGGGTTGGAGTTTAAGGGGTTGGGGCAGGACCCA	96367	9545	12436	51122	0.2731	0.2094	0.2094	0.2428
	64	GGGTCATGCCGGATTGGAGTTTAAGGGGTTGGGGCAGGACCC	161981	11880	16896	50707	0.4591	0.2606	0.2845	0.2409
	15	AGGGCGAGGTGGCAAAGTCTTGGGGAAAATTGGGTGGTGGGG	8276	5110	11911	50087	0.0235	0.1121	0.2006	0.2379
	70	GGGTCATGCCGGGTTGGAGTTTAAGGGATTGGGGCAGGACCC	157018	11438	15959	48688	0.445	0.2509	0.2687	0.2313
	31	AGGTCATGCCGGGTTGGAGTTTAAGGGGTTGGGGCAGGACCC	125267	10007	13200	48680	0.355	0.2196	0.2223	0.2312
	47	GGATGGCAGTTATGGGGAGATGGGTGGTGGGGCAGGTCCCG	88250	19140	18001	47444	0.2501	0.4199	0.3031	0.2254
	84	GGGTCATGCTGGGTTGGAGTTTAAGGGGTTGGGGCAGGACCC	146587	8539	14677	46051	0.4154	0.1873	0.2471	0.2187
	78	GGGTCATGCCGGGTTGGAGTTTAAGGGGTTGGGGCAGGACTC	214734	12778	16812	44865	0.6086	0.2803	0.2831	0.2131
	34	CCCCCCCCCCCCCCCCCCCCCCCCCCCCCCCCCCCGCCCCCG	21620	6735	9269	43420	0.0613	0.1478	0.1561	0.2063
	77	GGGTCATGCCGGGTTGGAGTTTAAGGGGTTGGGGCAGGACCT	137888	10822	14075	42060	0.3908	0.2374	0.237	0.1998
	63	GGGTCATGCCGAGTTGGAGTTTAAGGGGTTGGGGCAGGACCC	176993	10915	17025	41213	0.5016	0.2395	0.2867	0.1958
	21	AGGGGCACTTTGGGGGAAATATGGGAGGTGGGGGGGGCCCCG	31526	12121	14277	39917	0.0893	0.2659	0.2404	0.1896
	33	CCCCCCCCCCCCCCCCCCCCCCCCCCCCCCCCCCCCCTCCCG	20479	6211	8245	39108	0.058	0.1363	0.1388	0.1858
	37	CGGACGGGAGGGTGGGTTGGGTGGGTCTTACAAGGGGCCAGG	41960	19304	20005	38758	0.1189	0.4235	0.3369	0.1841
	94	TGGCAATTATGGGGAAATGGGTGGTGGGGCAGGTCCCGACA	67559	11177	13571	37433	0.1915	0.2452	0.2285	0.1778
	38	CGGACGGGAGGGTGGGTTGGGTGGGTTTTACAAGGGGCCAGG	5931	7487	13306	36058	0.0168	0.1643	0.2241	0.1713
	69	GGGTCATGCCGGGTTGGAGTTTAAGGAGTTGGGGCAGGACCC	145739	8621	14093	35763	0.413	0.1891	0.2373	0.1699
	27	AGGGGCGCTTTGGGGGAAATATGGGAGGTGGGGGGGTCCCGA	12665	4883	7950	34687	0.0359	0.1071	0.1339	0.1648
	17	AGGGCGAGGTGGCAAAGTTTTGGGGAAAATTGGGTGGTGGGG	1757	1543	5847	33290	0.005	0.0339	0.0985	0.1581
	40	GAGTCATGCCGGGTTGGAGTTTAAGGGGTTGGGGCAGGACCC	201664	12048	15328	31975	0.5715	0.2643	0.2581	0.1519
	12	AGGGACGCTTTGGGGGGAATTTGGGAGGTGGGGGAGGTCCCG	1600	2277	5171	31783	0.0045	0.05	0.0871	0.151
	9	AGGGACGCTTTGGGGGGAATATGGGAGGTGGGGGGGGTCCCG	11556	4654	6794	30692	0.0328	0.1021	0.1144	0.1458
	3	AGGGACACTTTGGGGGGAATGTGGGAGGTGGGGGGGGTCCCG	40290	10190	9937	30279	0.1142	0.2236	0.1673	0.1438
	42	GCGGTACGGTTTGACCGTCCGAAGAGCTTTAAGCGATTGAGG	25710	11343	8970	29508	0.0729	0.2489	0.151	0.1402
	71	GGGTCATGCCGGGTTGGAGTTTAAGGGGTTGGAGCAGGACCC	102997	5992	11008	29355	0.2919	0.1315	0.1854	0.1394
	43	GGACGGGCAAGATGGCTTCGGGGCTTGGGCGTTTTAAGGGGA	40372	19498	14532	28731	0.1144	0.4278	0.2447	0.1365
	45	GGATGGCAATTATGGGGAAATGGGTGGTGGGGCAGGTCCCG	50678	7742	9889	28084	0.1436	0.1699	0.1665	0.1334
	35	CGGACGGGAGGGTGGGTTGGGTGGGTATTACGAGGGGCCAGG	8467	6817	10632	27411	0.024	0.1496	0.179	0.1302
	75	GGGTCATGCCGGGTTGGAGTTTAAGGGGTTGGGGCAGGACCA	67368	6335	7948	26999	0.1909	0.139	0.1338	0.1282
	90	TGAACGGGAGGGTGGGAGGTTGCGGGTATAAGGGGCCCGTTG	79083	12547	10053	26174	0.2241	0.2753	0.1693	0.1243
	23	AGGGGCACTTTGGGGGGAATATGGGAGGTGGGGGGGGTCCCG	10907	5060	6501	25985	0.0309	0.111	0.1095	0.1234
	41	GCGGTACGGTTTGACCGTCCGAAGAGCTTCAAGCGATTGAGG	112965	16623	9516	25437	0.3202	0.3647	0.1602	0.1208
	106	TGGCGGTTTTGGGGAGATGGGTGGTGGGGCAGGTCCCGACA	19198	6039	7554	24993	0.0544	0.1325	0.1272	0.1187
	29	AGGGGCGCTTTGGGGGGAATTTGGGAGGTGGGGGGGGTCCCG	7799	3322	5304	24947	0.0221	0.0729	0.0893	0.1185
	79	GGGTCATGCCGGGTTGGAGTTTAAGGGGTTGGGGCAGGATCC	116944	7508	9628	24933	0.3314	0.1647	0.1621	0.1184
	83	GGGTCATGCCGGGTTGGAGTTTAAGGGGTTGGTGCAGGACCC	39957	3323	4071	23492	0.1132	0.0729	0.0685	0.1116
	61	GGGTCATACCGGGTTGGAGTTTAAGGGGTTGGGGCAGGACCC	119125	6391	9775	23236	0.3376	0.1402	0.1646	0.1104
	5	AGGGACGCTTTGGGGGAAATATGGGAGGTGGGGGGGGCCCCG	63011	11398	9946	23206	0.1786	0.2501	0.1675	0.1102
	80	GGGTCATGCCGGGTTGGAGTTTAAGGGGTTGGGGCAGTACCC	46275	4663	4381	23122	0.1312	0.1023	0.0738	0.1098
	2	AGGGACACTTTGGGGGAAATGTGGGAGGTGGGGGGGGTCCCG	14495	4992	6249	22563	0.0411	0.1095	0.1052	0.1072
	91	TGAACGGGAGGGTGGGAGGTTGCGGGTATGAGGGGCCCGTTA	4853	3444	5496	22407	0.0138	0.0756	0.0925	0.1064
	56	GGATGGCGGTTTTGGGGAGATGGGTGGTGGGGCAGGTCCCG	17158	5253	6799	21823	0.0486	0.1152	0.1145	0.1037
	58	GGGCGGGCAAGATGGCTTCGGGGCTTGGGCGTTTTAAGGGGA	5545	5519	6307	21519	0.0157	0.1211	0.1062	0.1022
	86	GGGTCATTCCGGGTTGGAGTTTAAGGGGTTGGGGCAGGACCC	48037	4235	4347	21047	0.1361	0.0929	0.0732	0.1
	10	AGGGACGCTTTGGGGGGAATGTGGGAGGTGGGGGAGGTCCCG	14367	5222	5875	20602	0.0407	0.1146	0.0989	0.0979
	14	AGGGACGTTTTGGGGGGAATGTGGGAGGTGGGGGGGGTCCCG	8917	4023	5408	20496	0.0253	0.0883	0.0911	0.0974
	67	GGGTCATGCCGGGTTGGAGTTTAAGAGGTTGGGGCAGAACCC	41926	6222	6510	20463	0.1188	0.1365	0.1096	0.0972
	65	GGGTCATGCCGGGTTGAAGTTTAAGGGGTTGGGGCAGGACCC	102438	5161	9805	20074	0.2903	0.1132	0.1651	0.0954
	96	TGGCAGTTATGGGGAAATGGGTGGTGGGGCAGGTCCCGACA	27914	6363	6721	17393	0.0791	0.1396	0.1132	0.0826
	62	GGGTCATGCCAGGTTGGAGTTTAAGGGGTTGGGGCAGGACCC	52723	3090	5761	14972	0.1494	0.0678	0.097	0.0711
	19	AGGGGACACTTTGGGGGACTATGGGAGGTGGGGGGAGACCCG	118178	23370	15674	14838	0.3349	0.5127	0.2639	0.0705
	25	AGGGGCGCTTTGGGGGAAATATGGGAGGTGGGGGGGGCCCCG	43943	6621	5989	13190	0.1245	0.1453	0.1008	0.0627
	87	GGGTTATGCCGGGTTGGAGTTTAAGGGGTTGGGGCAGGACCC	64517	2660	5815	12798	0.1829	0.0584	0.0979	0.0608
	36	CGGACGGGAGGGTGGGTTGGGTGGGTATTACTAGGGGCCAGG	9174	6265	6616	10960	0.026	0.1375	0.1114	0.0521
	93	TGGCAACTATGGGGAGATGGGTGGTGGGGCAGGTCCCGACA	53818	4818	4274	9994	0.1525	0.1057	0.072	0.0475
	101	TGGCGACTATGGGGAGATGGGTGGTGGGGCAGGTCCCGACA	134181	8491	5659	9745	0.3803	0.1863	0.0953	0.0463
	30	AGGGTTAAATGGGGGAAATTGGGTGGTGGGGGAGGGGGCACG	154495	6353	5186	9574	0.4379	0.1394	0.0873	0.0455
	51	GGATGGCGACTATGGGGAGATGGGTGGTGGGGCAGGTCCCG	103011	6005	4118	7363	0.2919	0.1317	0.0693	0.035
	59	GGGTAGGGTGGGATGGGTTTTAGGGGAGGAGGAGGGGCCCCG	54018	5002	3614	6507	0.1531	0.1097	0.0609	0.0309
G1	107	TTTTGCGAACGCGGGTAGGCGCACCCTTCGCACAAACGTCCC	29974	1697	2139	5894	0.085	0.0372	0.036	0.028
	20	AGGGGACACTTTGGGGGGTTATGGGAGGTGGGGGGAGACCCG	38881	6180	3722	3613	0.1102	0.1356	0.0627	0.0172
	89	GGTGGAGGTGGGTTTGAGAGAGAGGGGTGGTAGGATGGGGTT	57190	4514	2350	2809	0.1621	0.099	0.0396	0.0133

## Sheet: Bn-dU C9, C10
			Copy number				Frequency [%]
Clickmer	No	SEQUENCE (RANDOM REGION)	C6	C8	C9	C10	C6	C8	C9	C10
B1	42	CCAGGTTCGGTATATTCGGTCGCAGATACGAACCAGGGTATA	42	266	59665	1321807	0.0001	0.0058	0.4089	15.5235
	14	AGGGACGCTTTGGGGGGAATTTGGGAGGTGGGGGGGGTCCCG	19494	17626	290395	298789	0.0552	0.3867	1.99	3.509
	32	AGGGGCGCTTTGGGGGAAATATGGGAGGTGGGGGGGGTCCCG	113071	49772	393977	236980	0.3205	1.092	2.6998	2.7831
P2	89	GGGTCATGCCGGGTTGGAGTTTAAGGGGTTGGGGCAGGACCC	11442129	992384	1347492	214130	32.4287	21.7727	9.2339	2.5148
	26	AGGGGCACTTTGGGGGAAATATGGGAGGTGGGGGGGGTCCCG	35052	26792	234474	157083	0.0993	0.5878	1.6068	1.8448
	43	CCCCCCCCCCCCCCCCCCCCCCCCCCCCCCCCCCCCCCCCCG	228884	55911	342397	153543	0.6487	1.2267	2.3463	1.8032
	56	GGACGGGCAAGATGGCTTCGGGGCTTGGGCGTTTTAAGGGGA	40372	19498	308156	144200	0.1144	0.4278	2.1117	1.6935
	72	GGGCGGGCAAGATGGCTTCGGGGCTTGGGCGTTTTAAGGGGA	5545	5519	156436	131101	0.0157	0.1211	1.072	1.5397
	9	AGGGACGCTTTGGGGGAAATTTGGGAGGTGGGGGGGGTCCCG	4187	4740	104250	129128	0.0119	0.104	0.7144	1.5165
	35	AGGGGCGCTTTGGGGGAAATTTGGGAGGTGGGGGGGGTCCCG	3754	2819	65972	91352	0.0106	0.0618	0.4521	1.0729
	5	AGGGACACTTTGGGGGGAATTTGGGAGGTGGGGGGGGTCCCG	4570	4978	82013	81560	0.013	0.1092	0.562	0.9579
	113	TGGCGATTATGGGGAGATGGGTGGTGGGGCAGGTCCCGACA	374001	81121	255913	58836	1.06	1.7798	1.7537	0.691
	27	AGGGGCACTTTGGGGGAAATTTGGGAGGTGGGGGGGGTCCCG	1332	1628	38756	58028	0.0038	0.0357	0.2656	0.6815
	21	AGGGCGAGGTGGCAAAGTTTTGGGGAGAATTGGGTGGTGGGG	5394	4638	75645	56985	0.0153	0.1018	0.5184	0.6692
	102	TGACGGGCAAGATGGCTTCGGGGCTTGGGCGTTTTAAGGGGA	3061	2709	70914	51175	0.0087	0.0594	0.4859	0.601
	7	AGGGACGCTTTGGGGGAAATATGGGAGGTGGGGGGGGTCCCG	33852	17062	95042	45172	0.0959	0.3743	0.6513	0.5305
	115	TGGCGGTTATGGGGAGATGGGTGGTGGGGCAGGTCCCGACA	421282	77601	222622	41404	1.194	1.7026	1.5255	0.4863
	3	AGGGACACTTTGGGGGAAATTTGGGAGGTGGGGGGGGTCCCG	1138	1629	34591	40905	0.0032	0.0357	0.237	0.4804
	66	GGATGGCGATTATGGGGAGATGGGTGGTGGGGCAGGTCCCG	291732	57866	193405	40063	0.8268	1.2696	1.3253	0.4705
	37	AGGGGCGCTTTGGGGGGAATTTGGGAGGTGGGGGGGGTCCCG	7799	3322	41713	36845	0.0221	0.0729	0.2858	0.4327
	29	AGGGGCACTTTGGGGGGAATTTGGGAGGTGGGGGGGGTCCCG	2793	2173	32279	34128	0.0079	0.0477	0.2212	0.4008
	46	CCCCCCCCCCCCCCCCCCCCCCCCCCCCCCCCCCCGCCCCCG	21620	6735	53275	33342	0.0613	0.1478	0.3651	0.3916
	11	AGGGACGCTTTGGGGGGAATGTGGGAGGTGGGGGGGGTCCCG	136099	31151	109154	29887	0.3857	0.6834	0.748	0.351
	68	GGATGGCGGTTATGGGGAGATGGGTGGTGGGGCAGGTCCCG	331776	58080	168809	28084	0.9403	1.2743	1.1568	0.3298
	12	AGGGACGCTTTGGGGGGAATTTGGGAGGTGGGGGAGGTCCCG	1600	2277	30565	27724	0.0045	0.05	0.2095	0.3256
	8	AGGGACGCTTTGGGGGAAATGTGGGAGGTGGGGGGGGTCCCG	46960	16008	73799	25655	0.1331	0.3512	0.5057	0.3013
	44	CCCCCCCCCCCCCCCCCCCCCCCCCCCCCCCCCCCCCTCCCG	20479	6211	44647	24730	0.058	0.1363	0.3059	0.2904
	81	GGGTCATGCCGGGTTGGAGTTTAAGAGGTTGGGGCAGGACCC	317536	47343	94037	24066	0.8999	1.0387	0.6444	0.2826
	112	TGGCGATTATGGGGAAATGGGTGGTGGGGCAGGTCCCGACA	215960	37501	113146	24042	0.6121	0.8228	0.7753	0.2824
	105	TGGCAATTATGGGGAGATGGGTGGTGGGGCAGGTCCCGACA	142412	29830	100037	23437	0.4036	0.6545	0.6855	0.2752
	2	AGGGACACTTTGGGGGAAATATGGGAGGTGGGGGGGGTCCCG	8057	6161	40185	21619	0.0228	0.1352	0.2754	0.2539
	17	AGGGACGTTTTGGGGGGAATTTGGGAGGTGGGGGGGGTCCCG	585	616	15103	20914	0.0017	0.0135	0.1035	0.2456
	20	AGGGCGAGGTGGCAAAGTTTTGGGGAAAATTGGGTGGTGGGG	1757	1543	27355	20116	0.005	0.0339	0.1875	0.2362
	99	GGTGGAGGTGGGTTTGAGAGAGAGGGGTGGTAGGATGGGGTT	57190	4514	36293	19337	0.1621	0.099	0.2487	0.2271
	38	AGGGGCGTTTTGGGGGAAATATGGGAGGTGGGGGGGGTCCCG	2816	1714	20545	18380	0.008	0.0376	0.1408	0.2159
	30	AGGGGCGCTTTGGGGGAAATATGGGAGGTGGGGGAGGTCCCG	9764	5722	34701	17863	0.0277	0.1255	0.2378	0.2098
	59	GGATGGCAATTATGGGGAGATGGGTGGTGGGGCAGGTCCCG	110608	21336	75296	15710	0.3135	0.4681	0.516	0.1845
	65	GGATGGCGATTATGGGGAAATGGGTGGTGGGGCAGGTCCCG	164989	25907	83672	15607	0.4676	0.5684	0.5734	0.1833
	48	CCCCCCCCCCCCCCCCCCCCCCCCCCCCCCCCCCGCCCCCCG	9903	3221	22563	15362	0.0281	0.0707	0.1546	0.1804
	16	AGGGACGTTTTGGGGGGAATGTGGGAGGTGGGGGGGGTCCCG	8917	4023	28925	15210	0.0253	0.0883	0.1982	0.1786
	28	AGGGGCACTTTGGGGGGAATATGGGAGGTGGGGGGGGTCCCG	10907	5060	28444	14235	0.0309	0.111	0.1949	0.1672
	47	CCCCCCCCCCCCCCCCCCCCCCCCCCCCCCCCCCCGCTCCCG	8822	2501	19160	14113	0.025	0.0549	0.1313	0.1657
	13	AGGGACGCTTTGGGGGGAATTTGGGAGGTGGGGGGGGGCCCG	2666	2402	23578	13389	0.0076	0.0527	0.1616	0.1572
	45	CCCCCCCCCCCCCCCCCCCCCCCCCCCCCCCCCCCCGCCCCG	8472	2706	20731	13336	0.024	0.0594	0.1421	0.1566
	114	TGGCGGTTATGGGGAAATGGGTGGTGGGGCAGGTCCCGACA	175848	29029	77323	12803	0.4984	0.6369	0.5299	0.1504
	33	AGGGGCGCTTTGGGGGAAATATGGGAGGTGGGGGGGGTCCCT	3349	2501	16707	12780	0.0095	0.0549	0.1145	0.1501
	19	AGGGCGAGGTGGCAAAGTCTTGGGGAGAATTGGGTGGTGGGG	24107	12997	58062	12770	0.0683	0.2852	0.3979	0.15
	1	AGACGGGCAAGATGGCTTCGGGGCTTGGGCGTTTTAAGGGGA	2275	1429	26747	12459	0.0064	0.0314	0.1833	0.1463
	71	GGGCGGACAAGATGGCTTCGGGGCTTGGGCGTTTTAAGGGGA	745	715	17932	12161	0.0021	0.0157	0.1229	0.1428
	86	GGGTCATGCCGGGTTGGAGTTTAAGGGGTTGGGGCAAGACCC	775947	65556	91707	11903	2.1991	1.4383	0.6284	0.1398
	107	TGGCAGTTATGGGGAGATGGGTGGTGGGGCAGGTCCCGACA	112056	26012	63963	11638	0.3176	0.5707	0.4383	0.1367
	39	AGGGGTGCTTTGGGGGAAATATGGGAGGTGGGGGGGGTCCCG	4172	1320	14724	10784	0.0118	0.029	0.1009	0.1266
	51	GAGGGAAGGGGATTGGTGGGTTTGTGGGACGGGGGCACCTCC	19578	5485	34646	10355	0.0555	0.1203	0.2374	0.1216
	116	TGGCGGTTTTGGGGAGATGGGTGGTGGGGCAGGTCCCGACA	19198	6039	32092	10028	0.0544	0.1325	0.2199	0.1178
	15	AGGGACGTTTTGGGGGAAATGTGGGAGGTGGGGGGGGTCCCG	2548	1525	15028	10007	0.0072	0.0335	0.103	0.1175
	36	AGGGGCGCTTTGGGGGGAATATGGGAGGTGGGGGGGGTCCCG	19844	4683	21447	8862	0.0562	0.1027	0.147	0.1041
	10	AGGGACGCTTTGGGGGGAATATGGGAGGTGGGGGGGGTCCCG	11556	4654	21575	8645	0.0328	0.1021	0.1478	0.1015
	67	GGATGGCGGTTATGGGGAAATGGGTGGTGGGGCAGGTCCCG	136672	20838	57712	8493	0.3873	0.4572	0.3955	0.0997
	60	GGATGGCAGTTATGGGGAGATGGGTGGTGGGGCAGGTCCCG	88250	19140	48766	8184	0.2501	0.4199	0.3342	0.0961
	18	AGGGCGAGGTGGCAAAGTCTTGGGGAAAATTGGGTGGTGGGG	8276	5110	30204	8059	0.0235	0.1121	0.207	0.0946
	34	AGGGGCGCTTTGGGGGAAATATGGGAGGTGGGGGGGTCCCGA	12665	4883	18402	7895	0.0359	0.1071	0.1261	0.0927
	24	AGGGGCACTTTGGGGGAAATATGGGAGGTGGGGGAGGTCCCG	2796	2202	14452	7697	0.0079	0.0483	0.099	0.0904
	69	GGATGGCGGTTTTGGGGAGATGGGTGGTGGGGCAGGTCCCG	17158	5253	26846	7586	0.0486	0.1152	0.184	0.0891
	104	TGGCAATTATGGGGAAATGGGTGGTGGGGCAGGTCCCGACA	67559	11177	35857	7509	0.1915	0.2452	0.2457	0.0882
	97	GGGTCATGTCGGGTTGGAGTTTAAGGGGTTGGGGCAGGACCC	396670	33513	42484	6619	1.1242	0.7353	0.2911	0.0777
	85	GGGTCATGCCGGGTTGGAGTTTAAGGGGTTGGGACAGGACCC	592429	47654	47441	6597	1.679	1.0455	0.3251	0.0775
	87	GGGTCATGCCGGGTTGGAGTTTAAGGGGTTGGGGCAGAACCC	857328	61805	56992	6137	2.4298	1.356	0.3905	0.0721
	109	TGGCGAATATGGGGAGATGGGTGGTGGGGCAGGTCCCGACA	87235	20098	39754	5742	0.2472	0.4409	0.2724	0.0674
	50	CGGACGGGAGGGTGGGTTGGGTGGGTTTTACAAGGGGCCAGG	5931	7487	27294	5354	0.0168	0.1643	0.187	0.0629
	94	GGGTCATGCCGGGTTGGAGTTTAAGGGGTTGGGGCATGACCC	139629	15582	26716	5309	0.3957	0.3419	0.1831	0.0623
	58	GGATGGCAATTATGGGGAAATGGGTGGTGGGGCAGGTCCCG	50678	7742	26309	4782	0.1436	0.1699	0.1803	0.0562
G1	117	TTTTGCGAACGCGGGTAGGCGCACCCTTCGCACAAACGTCCC	29974	1697	6677	4309	0.085	0.0372	0.0458	0.0506
	110	TGGCGACTATGGGGAAATGGGTGGTGGGGCAGGTCCCGACA	390019	41680	48317	3622	1.1054	0.9145	0.3311	0.0425
	62	GGATGGCGAATATGGGGAGATGGGTGGTGGGGCAGGTCCCG	63645	13257	28273	3607	0.1804	0.2909	0.1937	0.0424
	70	GGGCCATGCCGGGTTGGAGTTTAAGGGGTTGGGGCAGGACCC	307246	27004	29596	3491	0.8708	0.5925	0.2028	0.041
	95	GGGTCATGCCGGGTTGGAGTTTAAGGGGTTGGGGTAGGACCC	303734	21076	27291	3376	0.8608	0.4624	0.187	0.0396
	57	GGATCATGCCGGGTTGGAGTTTAAGGGGTTGGGGCAGGACCC	418400	28546	33787	3310	1.1858	0.6263	0.2315	0.0389
	108	TGGCGAATATGGGGAAATGGGTGGTGGGGCAGGTCCCGACA	47420	9839	20346	3265	0.1344	0.2159	0.1394	0.0383
	4	AGGGACACTTTGGGGGGAATGTGGGAGGTGGGGGGGGTCCCG	40290	10190	20172	3219	0.1142	0.2236	0.1382	0.0378
	25	AGGGGCACTTTGGGGGAAATATGGGAGGTGGGGGGGGCCCCG	31526	12121	22361	2573	0.0893	0.2659	0.1532	0.0302
	106	TGGCAGTTATGGGGAAATGGGTGGTGGGGCAGGTCCCGACA	27914	6363	15083	2542	0.0791	0.1396	0.1034	0.0299
	80	GGGTCATGCCGGGTTGGAGTTTAAGAGGTTGGGGCAGAACCC	41926	6222	12073	2429	0.1188	0.1365	0.0827	0.0285
	90	GGGTCATGCCGGGTTGGAGTTTAAGGGGTTGGGGCAGGACCT	137888	10822	17516	2390	0.3908	0.2374	0.12	0.0281
	63	GGATGGCGACTATGGGGAAATGGGTGGTGGGGCAGGTCCCG	291068	28499	35380	2339	0.8249	0.6253	0.2424	0.0275
	77	GGGTCATGCCGGATTGGAGTTTAAGGGGTTGGGGCAGGACCC	161981	11880	18188	2328	0.4591	0.2606	0.1246	0.0273
	98	GGTCATGCCGGGTTGGAGTTTAAGGGGTTGGGGCAGGACCCA	96367	9545	13698	2197	0.2731	0.2094	0.0939	0.0258
	83	GGGTCATGCCGGGTTGGAGTTTAAGGGATTGGGGCAGGACCC	157018	11438	17281	2185	0.445	0.2509	0.1184	0.0257
	76	GGGTCATGCCGAGTTGGAGTTTAAGGGGTTGGGGCAGGACCC	176993	10915	20921	2162	0.5016	0.2395	0.1434	0.0254
	79	GGGTCATGCCGGGTTGGAATTTAAGGGGTTGGGGCAGGACCC	163734	9283	21194	2080	0.464	0.2037	0.1452	0.0244
	41	AGGTCATGCCGGGTTGGAGTTTAAGGGGTTGGGGCAGGACCC	125267	10007	15014	2012	0.355	0.2196	0.1029	0.0236
	96	GGGTCATGCTGGGTTGGAGTTTAAGGGGTTGGGGCAGGACCC	146587	8539	18890	1980	0.4154	0.1873	0.1294	0.0233
	49	CGGACGGGAGGGTGGGTTGGGTGGGTCTTACAAGGGGCCAGG	41960	19304	23334	1940	0.1189	0.4235	0.1599	0.0228
	61	GGATGGCGAATATGGGGAAATGGGTGGTGGGGCAGGTCCCG	33815	6341	14419	1942	0.0958	0.1391	0.0988	0.0228
	91	GGGTCATGCCGGGTTGGAGTTTAAGGGGTTGGGGCAGGACTC	214734	12778	20676	1859	0.6086	0.2803	0.1417	0.0218
	82	GGGTCATGCCGGGTTGGAGTTTAAGGAGTTGGGGCAGGACCC	145739	8621	17344	1793	0.413	0.1891	0.1189	0.0211
	88	GGGTCATGCCGGGTTGGAGTTTAAGGGGTTGGGGCAGGACCA	67368	6335	9171	1584	0.1909	0.139	0.0628	0.0186
	53	GAGTCATGCCGGGTTGGAGTTTAAGGGGTTGGGGCAGGACCC	201664	12048	16652	1454	0.5715	0.2643	0.1141	0.0171
	31	AGGGGCGCTTTGGGGGAAATATGGGAGGTGGGGGGGGCCCCG	43943	6621	10306	1353	0.1245	0.1453	0.0706	0.0159
	52	GAGGGTAGGGTGGGTGGGATATATAGGGGCCCTCAGGGTCCG	31167	11751	14556	1226	0.0883	0.2578	0.0997	0.0144
	74	GGGTAGGGTGGGTTGGGTTTCAAAGGAGGAGGAGGGGCCCCG	9219	10741	14601	1211	0.0261	0.2357	0.1001	0.0142
	55	GCGGTACGGTTTGACCGTCCGAAGAGCTTTAAGCGATTGAGG	25710	11343	22368	1174	0.0729	0.2489	0.1533	0.0138
	22	AGGGGACACTTTGGGGGACTATGGGAGGTGGGGGGAGACCCG	118178	23370	29439	1166	0.3349	0.5127	0.2017	0.0137
	92	GGGTCATGCCGGGTTGGAGTTTAAGGGGTTGGGGCAGGATCC	116944	7508	10311	1109	0.3314	0.1647	0.0707	0.013
	75	GGGTCATACCGGGTTGGAGTTTAAGGGGTTGGGGCAGGACCC	119125	6391	10730	999	0.3376	0.1402	0.0735	0.0117
	84	GGGTCATGCCGGGTTGGAGTTTAAGGGGTTGGAGCAGGACCC	102997	5992	10502	973	0.2919	0.1315	0.072	0.0114
	93	GGGTCATGCCGGGTTGGAGTTTAAGGGGTTGGGGCAGTACCC	46275	4663	4985	954	0.1312	0.1023	0.0342	0.0112
	78	GGGTCATGCCGGGTTGAAGTTTAAGGGGTTGGGGCAGGACCC	102438	5161	11353	921	0.2903	0.1132	0.0778	0.0108
	6	AGGGACGCTTTGGGGGAAATATGGGAGGTGGGGGGGGCCCCG	63011	11398	6329	352	0.1786	0.2501	0.0434	0.0041
	23	AGGGGACACTTTGGGGGGTTATGGGAGGTGGGGGGAGACCCG	38881	6180	7914	302	0.1102	0.1356	0.0542	0.0035
	103	TGGCAACTATGGGGAGATGGGTGGTGGGGCAGGTCCCGACA	53818	4818	5213	302	0.1525	0.1057	0.0357	0.0035
	111	TGGCGACTATGGGGAGATGGGTGGTGGGGCAGGTCCCGACA	134181	8491	5019	199	0.3803	0.1863	0.0344	0.0023
	54	GCGGTACGGTTTGACCGTCCGAAGAGCTTCAAGCGATTGAGG	112965	16623	9922	162	0.3202	0.3647	0.068	0.0019
	64	GGATGGCGACTATGGGGAGATGGGTGGTGGGGCAGGTCCCG	103011	6005	3673	150	0.2919	0.1317	0.0252	0.0018
	73	GGGTAGGGTGGGATGGGTTTTAGGGGAGGAGGAGGGGCCCCG	54018	5002	2004	40	0.1531	0.1097	0.0137	0.0005
	40	AGGGTTAAATGGGGGAAATTGGGTGGTGGGGGAGGGGGCACG	154495	6353	1484	24	0.4379	0.1394	0.0102	0.0003
	101	TGAACGGGAGGGTGGGAGGTTGCGGGTATGAGGGGCCCGTTG	91872	48961	2630	22	0.2604	1.0742	0.018	0.0003
	100	TGAACGGGAGGGTGGGAGGTTGCGGGTATAAGGGGCCCGTTG	79083	12547	294	1	0.2241	0.2753	0.002	0

## Sheet: Ib-dU C9, C10
			Copy number				Frequency [%]
Clickmer	No	SEQUENCE (RANDOM REGION)	C6	C8	C9	C10	C6	C8	C9	C10
P2	85	GGGTCATGCCGGGTTGGAGTTTAAGGGGTTGGGGCAGGACCC	11442129	992384	2217738	79193	32.4287	21.7727	13.3351	8.2452
	29	AGGGGCGCTTTGGGGGAAATATGGGAGGTGGGGGGGGTCCCG	113071	49772	362121	35554	0.3205	1.092	2.1774	3.7017
	23	AGGGGCACTTTGGGGGAAATATGGGAGGTGGGGGGGGTCCCG	35052	26792	210123	22617	0.0993	0.5878	1.2635	2.3548
	37	CCCCCCCCCCCCCCCCCCCCCCCCCCCCCCCCCCCCCCCCCG	228884	55911	232490	18333	0.6487	1.2267	1.3979	1.9087
	14	AGGGACGCTTTGGGGGGAATTTGGGAGGTGGGGGGGGTCCCG	19494	17626	141122	14686	0.0552	0.3867	0.8486	1.529
	109	TGGCGATTATGGGGAGATGGGTGGTGGGGCAGGTCCCGACA	374001	81121	287335	14142	1.06	1.7798	1.7277	1.4724
	7	AGGGACGCTTTGGGGGAAATATGGGAGGTGGGGGGGGTCCCG	33852	17062	113456	10585	0.0959	0.3743	0.6822	1.1021
	62	GGATGGCGATTATGGGGAGATGGGTGGTGGGGCAGGTCCCG	291732	57866	218969	10336	0.8268	1.2696	1.3166	1.0761
	111	TGGCGGTTATGGGGAGATGGGTGGTGGGGCAGGTCCCGACA	421282	77601	236152	9737	1.194	1.7026	1.42	1.0138
	43	CGGACGGGAGGGTGGGTTGGGTGGGTCTTACAAGGGGCCAGG	41960	19304	109718	9098	0.1189	0.4235	0.6597	0.9472
	108	TGGCGATTATGGGGAAATGGGTGGTGGGGCAGGTCCCGACA	215960	37501	149424	7725	0.6121	0.8228	0.8985	0.8043
	77	GGGTCATGCCGGGTTGGAGTTTAAGAGGTTGGGGCAGGACCC	317536	47343	133919	7392	0.8999	1.0387	0.8052	0.7696
	64	GGATGGCGGTTATGGGGAGATGGGTGGTGGGGCAGGTCCCG	331776	58080	181583	7373	0.9403	1.2743	1.0918	0.7676
	101	TGGCAATTATGGGGAGATGGGTGGTGGGGCAGGTCCCGACA	142412	29830	124967	6752	0.4036	0.6545	0.7514	0.703
	47	GAGGGTAGGGTGGGTGGGATATATAGGGGCCCTCAGGGTCCG	31167	11751	68841	5922	0.0883	0.2578	0.4139	0.6166
	9	AGGGACGCTTTGGGGGAAATTTGGGAGGTGGGGGGGGTCCCG	4187	4740	47148	5846	0.0119	0.104	0.2835	0.6087
	61	GGATGGCGATTATGGGGAAATGGGTGGTGGGGCAGGTCCCG	164989	25907	112037	5631	0.4676	0.5684	0.6737	0.5863
	41	CGGACGGGAGGGTGGGTTGGGTGGGTATTACGAGGGGCCAGG	8467	6817	54775	5187	0.024	0.1496	0.3294	0.54
	12	AGGGACGCTTTGGGGGGAATGTGGGAGGTGGGGGGGGTCCCG	136099	31151	110549	5154	0.3857	0.6834	0.6647	0.5366
	54	GGATGGCAATTATGGGGAGATGGGTGGTGGGGCAGGTCCCG	110608	21336	95460	5127	0.3135	0.4681	0.574	0.5338
	1	AGGGACACTTTGGGGGAAATATGGGAGGTGGGGGGGGTCCCG	8057	6161	44922	4719	0.0228	0.1352	0.2701	0.4913
	8	AGGGACGCTTTGGGGGAAATGTGGGAGGTGGGGGGGGTCCCG	46960	16008	75855	4540	0.1331	0.3512	0.4561	0.4727
	106	TGGCGACTATGGGGAAATGGGTGGTGGGGCAGGTCCCGACA	390019	41680	116830	4503	1.1054	0.9145	0.7025	0.4688
	82	GGGTCATGCCGGGTTGGAGTTTAAGGGGTTGGGGCAAGACCC	775947	65556	141598	4502	2.1991	1.4383	0.8514	0.4687
	110	TGGCGGTTATGGGGAAATGGGTGGTGGGGCAGGTCCCGACA	175848	29029	101053	4470	0.4984	0.6369	0.6076	0.4654
	26	AGGGGCGCTTTGGGGGAAATATGGGAGGTGGGGGAGGTCCCG	9764	5722	45856	4411	0.0277	0.1255	0.2757	0.4593
	105	TGGCGAATATGGGGAGATGGGTGGTGGGGCAGGTCCCGACA	87235	20098	79234	4409	0.2472	0.4409	0.4764	0.459
	103	TGGCAGTTATGGGGAGATGGGTGGTGGGGCAGGTCCCGACA	112056	26012	87516	4158	0.3176	0.5707	0.5262	0.4329
	45	CGGACGGGAGGGTGGGTTGGGTGGGTTTTACAAGGGGCCAGG	5931	7487	51988	3853	0.0168	0.1643	0.3126	0.4012
	5	AGGGACACTTTGGGGGGAATTTGGGAGGTGGGGGGGGTCCCG	4570	4978	37659	3498	0.013	0.1092	0.2264	0.3642
	32	AGGGGCGCTTTGGGGGAAATTTGGGAGGTGGGGGGGGTCCCG	3754	2819	27297	3387	0.0106	0.0618	0.1641	0.3526
	42	CGGACGGGAGGGTGGGTTGGGTGGGTATTACTAGGGGCCAGG	9174	6265	42174	3307	0.026	0.1375	0.2536	0.3443
	56	GGATGGCAGTTATGGGGAGATGGGTGGTGGGGCAGGTCCCG	88250	19140	67758	3206	0.2501	0.4199	0.4074	0.3338
	58	GGATGGCGAATATGGGGAGATGGGTGGTGGGGCAGGTCCCG	63645	13257	56754	3200	0.1804	0.2909	0.3413	0.3332
	63	GGATGGCGGTTATGGGGAAATGGGTGGTGGGGCAGGTCCCG	136672	20838	76126	3199	0.3873	0.4572	0.4577	0.3331
	59	GGATGGCGACTATGGGGAAATGGGTGGTGGGGCAGGTCCCG	291068	28499	85133	3197	0.8249	0.6253	0.5119	0.3329
	100	TGGCAATTATGGGGAAATGGGTGGTGGGGCAGGTCCCGACA	67559	11177	52449	3120	0.1915	0.2452	0.3154	0.3248
	44	CGGACGGGAGGGTGGGTTGGGTGGGTCTTACGAGGGGCCAGG	11009	5114	30353	3101	0.0312	0.1122	0.1825	0.3229
	39	CCCCCCCCCCCCCCCCCCCCCCCCCCCCCCCCCCCGCCCCCG	21620	6735	36079	2753	0.0613	0.1478	0.2169	0.2866
	93	GGGTCATGTCGGGTTGGAGTTTAAGGGGTTGGGGCAGGACCC	396670	33513	74371	2753	1.1242	0.7353	0.4472	0.2866
	70	GGGTAGGGTGGGTTGGGTTTCAAAGGAGGAGGAGGGGCCCCG	9219	10741	46266	2743	0.0261	0.2357	0.2782	0.2856
	81	GGGTCATGCCGGGTTGGAGTTTAAGGGGTTGGGACAGGACCC	592429	47654	86569	2653	1.679	1.0455	0.5205	0.2762
	104	TGGCGAATATGGGGAAATGGGTGGTGGGGCAGGTCCCGACA	47420	9839	44602	2653	0.1344	0.2159	0.2682	0.2762
	68	GGGCGGGCAAGATGGCTTCGGGGCTTGGGCGTTTTAAGGGGA	5545	5519	50000	2582	0.0157	0.1211	0.3006	0.2688
	83	GGGTCATGCCGGGTTGGAGTTTAAGGGGTTGGGGCAGAACCC	857328	61805	94389	2458	2.4298	1.356	0.5676	0.2559
	17	AGGGCGAGGTGGCAAAGTCTTGGGGAGAATTGGGTGGTGGGG	24107	12997	49337	2347	0.0683	0.2852	0.2967	0.2444
	38	CCCCCCCCCCCCCCCCCCCCCCCCCCCCCCCCCCCCCTCCCG	20479	6211	30917	2330	0.058	0.1363	0.1859	0.2426
	18	AGGGCGAGGTGGCAAAGTTTTGGGGAGAATTGGGTGGTGGGG	5394	4638	31333	2323	0.0153	0.1018	0.1884	0.2419
	53	GGATGGCAATTATGGGGAAATGGGTGGTGGGGCAGGTCCCG	50678	7742	39198	2217	0.1436	0.1699	0.2357	0.2308
	24	AGGGGCACTTTGGGGGAAATTTGGGAGGTGGGGGGGGTCCCG	1332	1628	15973	2152	0.0038	0.0357	0.096	0.2241
	30	AGGGGCGCTTTGGGGGAAATATGGGAGGTGGGGGGGGTCCCT	3349	2501	20566	2077	0.0095	0.0549	0.1237	0.2162
	13	AGGGACGCTTTGGGGGGAATTTGGGAGGTGGGGGAGGTCCCG	1600	2277	20088	2057	0.0045	0.05	0.1208	0.2142
	10	AGGGACGCTTTGGGGGGAATATGGGAGGTGGGGGGGGTCCCG	11556	4654	25968	2052	0.0328	0.1021	0.1561	0.2136
	31	AGGGGCGCTTTGGGGGAAATATGGGAGGTGGGGGGGTCCCGA	12665	4883	25517	2020	0.0359	0.1071	0.1534	0.2103
	21	AGGGGCACTTTGGGGGAAATATGGGAGGTGGGGGAGGTCCCG	2796	2202	19185	1892	0.0079	0.0483	0.1154	0.197
	25	AGGGGCACTTTGGGGGGAATATGGGAGGTGGGGGGGGTCCCG	10907	5060	25701	1823	0.0309	0.111	0.1545	0.1898
	2	AGGGACACTTTGGGGGAAATTTGGGAGGTGGGGGGGGTCCCG	1138	1629	15591	1805	0.0032	0.0357	0.0937	0.1879
	57	GGATGGCGAATATGGGGAAATGGGTGGTGGGGCAGGTCCCG	33815	6341	30783	1774	0.0958	0.1391	0.1851	0.1847
	97	TGAACGGGAGGGTGGGAGGTTGCGGGTATGAGGGGCCCGTTG	91872	48961	56095	1765	0.2604	1.0742	0.3373	0.1838
	34	AGGGGCGCTTTGGGGGGAATTTGGGAGGTGGGGGGGGTCCCG	7799	3322	19624	1641	0.0221	0.0729	0.118	0.1709
	51	GGACGGGCAAGATGGCTTCGGGGCTTGGGCGTTTTAAGGGGA	40372	19498	80811	1637	0.1144	0.4278	0.4859	0.1704
	90	GGGTCATGCCGGGTTGGAGTTTAAGGGGTTGGGGCATGACCC	139629	15582	40662	1591	0.3957	0.3419	0.2445	0.1656
	16	AGGGCGAGGTGGCAAAGTCTTGGGGAAAATTGGGTGGTGGGG	8276	5110	25454	1575	0.0235	0.1121	0.1531	0.164
	46	GAGGGAAGGGGATTGGTGGGTTTGTGGGACGGGGGCACCTCC	19578	5485	21764	1465	0.0555	0.1203	0.1309	0.1525
	27	AGGGGCGCTTTGGGGGAAATATGGGAGGTGGGGGGAGTCCCG	4739	2461	17757	1412	0.0134	0.054	0.1068	0.147
	33	AGGGGCGCTTTGGGGGGAATATGGGAGGTGGGGGGGGTCCCG	19844	4683	20907	1412	0.0562	0.1027	0.1257	0.147
	91	GGGTCATGCCGGGTTGGAGTTTAAGGGGTTGGGGTAGGACCC	303734	21076	47802	1383	0.8608	0.4624	0.2874	0.144
	102	TGGCAGTTATGGGGAAATGGGTGGTGGGGCAGGTCCCGACA	27914	6363	24556	1289	0.0791	0.1396	0.1477	0.1342
	52	GGATCATGCCGGGTTGGAGTTTAAGGGGTTGGGGCAGGACCC	418400	28546	54699	1273	1.1858	0.6263	0.3289	0.1325
	66	GGCGGGCGTTTTGCGCCCGAGTGTTAACGACACAAGGGACCA	2791	3214	22414	1257	0.0079	0.0705	0.1348	0.1309
	73	GGGTCATGCCGGATTGGAGTTTAAGGGGTTGGGGCAGGACCC	161981	11880	35658	1242	0.4591	0.2606	0.2144	0.1293
	67	GGGCCATGCCGGGTTGGAGTTTAAGGGGTTGGGGCAGGACCC	307246	27004	44844	1197	0.8708	0.5925	0.2696	0.1246
	75	GGGTCATGCCGGGTTGGAATTTAAGGGGTTGGGGCAGGACCC	163734	9283	38224	1187	0.464	0.2037	0.2298	0.1236
	3	AGGGACACTTTGGGGGGAATATGGGAGGTGGGGGGGGTCCCG	5719	2917	15899	1173	0.0162	0.064	0.0956	0.1221
	79	GGGTCATGCCGGGTTGGAGTTTAAGGGATTGGGGCAGGACCC	157018	11438	32464	1144	0.445	0.2509	0.1952	0.1191
	40	CCCCCCCCCCCCCCCCCCCCCCCCCCCCCCCCCCGCCCCCCG	9903	3221	17501	1134	0.0281	0.0707	0.1052	0.1181
	15	AGGGACGTTTTGGGGGGAATGTGGGAGGTGGGGGGGGTCCCG	8917	4023	18372	1026	0.0253	0.0883	0.1105	0.1068
	72	GGGTCATGCCGAGTTGGAGTTTAAGGGGTTGGGGCAGGACCC	176993	10915	37564	1007	0.5016	0.2395	0.2259	0.1048
	98	TGACGGGCAAGATGGCTTCGGGGCTTGGGCGTTTTAAGGGGA	3061	2709	22042	991	0.0087	0.0594	0.1325	0.1032
	55	GGATGGCAGTTATGGGGAAATGGGTGGTGGGGCAGGTCCCG	21563	4513	18453	989	0.0611	0.099	0.111	0.103
	22	AGGGGCACTTTGGGGGAAATATGGGAGGTGGGGGGGGCCCCG	31526	12121	29450	985	0.0893	0.2659	0.1771	0.1026
	4	AGGGACACTTTGGGGGGAATGTGGGAGGTGGGGGGGGTCCCG	40290	10190	26776	950	0.1142	0.2236	0.161	0.0989
	94	GGTCATGCCGGGTTGGAGTTTAAGGGGTTGGGGCAGGACCCA	96367	9545	22843	883	0.2731	0.2094	0.1374	0.0919
	112	TGGCGGTTTTGGGGAGATGGGTGGTGGGGCAGGTCCCGACA	19198	6039	20200	881	0.0544	0.1325	0.1215	0.0917
	36	AGGTCATGCCGGGTTGGAGTTTAAGGGGTTGGGGCAGGACCC	125267	10007	25305	871	0.355	0.2196	0.1522	0.0907
	78	GGGTCATGCCGGGTTGGAGTTTAAGGAGTTGGGGCAGGACCC	145739	8621	30760	860	0.413	0.1891	0.185	0.0895
	11	AGGGACGCTTTGGGGGGAATGTGGGAGGTGGGGGAGGTCCCG	14367	5222	19360	827	0.0407	0.1146	0.1164	0.0861
	92	GGGTCATGCTGGGTTGGAGTTTAAGGGGTTGGGGCAGGACCC	146587	8539	29384	812	0.4154	0.1873	0.1767	0.0845
	86	GGGTCATGCCGGGTTGGAGTTTAAGGGGTTGGGGCAGGACCT	137888	10822	27277	775	0.3908	0.2374	0.164	0.0807
	87	GGGTCATGCCGGGTTGGAGTTTAAGGGGTTGGGGCAGGACTC	214734	12778	32787	735	0.6086	0.2803	0.1971	0.0765
	65	GGATGGCGGTTTTGGGGAGATGGGTGGTGGGGCAGGTCCCG	17158	5253	17149	714	0.0486	0.1152	0.1031	0.0743
	48	GAGTCATGCCGGGTTGGAGTTTAAGGGGTTGGGGCAGGACCC	201664	12048	30153	626	0.5715	0.2643	0.1813	0.0652
	99	TGGCAACTATGGGGAGATGGGTGGTGGGGCAGGTCCCGACA	53818	4818	13131	533	0.1525	0.1057	0.079	0.0555
	71	GGGTCATACCGGGTTGGAGTTTAAGGGGTTGGGGCAGGACCC	119125	6391	20415	510	0.3376	0.1402	0.1228	0.0531
	76	GGGTCATGCCGGGTTGGAGTTTAAGAGGTTGGGGCAGAACCC	41926	6222	13271	503	0.1188	0.1365	0.0798	0.0524
	74	GGGTCATGCCGGGTTGAAGTTTAAGGGGTTGGGGCAGGACCC	102438	5161	19901	475	0.2903	0.1132	0.1197	0.0495
	50	GCGGTACGGTTTGACCGTCCGAAGAGCTTTAAGCGATTGAGG	25710	11343	27879	466	0.0729	0.2489	0.1676	0.0485
	80	GGGTCATGCCGGGTTGGAGTTTAAGGGGTTGGAGCAGGACCC	102997	5992	18613	464	0.2919	0.1315	0.1119	0.0483
	84	GGGTCATGCCGGGTTGGAGTTTAAGGGGTTGGGGCAGGACCA	67368	6335	15326	441	0.1909	0.139	0.0922	0.0459
	88	GGGTCATGCCGGGTTGGAGTTTAAGGGGTTGGGGCAGGATCC	116944	7508	18106	430	0.3314	0.1647	0.1089	0.0448
	107	TGGCGACTATGGGGAGATGGGTGGTGGGGCAGGTCCCGACA	134181	8491	15587	411	0.3803	0.1863	0.0937	0.0428
	89	GGGTCATGCCGGGTTGGAGTTTAAGGGGTTGGGGCAGTACCC	46275	4663	8604	385	0.1312	0.1023	0.0517	0.0401
	6	AGGGACGCTTTGGGGGAAATATGGGAGGTGGGGGGGGCCCCG	63011	11398	16345	380	0.1786	0.2501	0.0983	0.0396
	28	AGGGGCGCTTTGGGGGAAATATGGGAGGTGGGGGGGGCCCCG	43943	6621	13220	356	0.1245	0.1453	0.0795	0.0371
	35	AGGGTTAAATGGGGGAAATTGGGTGGTGGGGGAGGGGGCACG	154495	6353	11235	331	0.4379	0.1394	0.0676	0.0345
	60	GGATGGCGACTATGGGGAGATGGGTGGTGGGGCAGGTCCCG	103011	6005	11631	295	0.2919	0.1317	0.0699	0.0307
	19	AGGGGACACTTTGGGGGACTATGGGAGGTGGGGGGAGACCCG	118178	23370	27857	290	0.3349	0.5127	0.1675	0.0302
	49	GCGGTACGGTTTGACCGTCCGAAGAGCTTCAAGCGATTGAGG	112965	16623	22612	232	0.3202	0.3647	0.136	0.0242
	96	TGAACGGGAGGGTGGGAGGTTGCGGGTATAAGGGGCCCGTTG	79083	12547	9594	205	0.2241	0.2753	0.0577	0.0213
	113	TTTTGCGAACGCGGGTAGGCGCACCCTTCGCACAAACGTCCC	29974	1697	2946	150	0.085	0.0372	0.0177	0.0156
	69	GGGTAGGGTGGGATGGGTTTTAGGGGAGGAGGAGGGGCCCCG	54018	5002	7679	145	0.1531	0.1097	0.0462	0.0151
	20	AGGGGACACTTTGGGGGGTTATGGGAGGTGGGGGGAGACCCG	38881	6180	8467	100	0.1102	0.1356	0.0509	0.0104
	95	GGTGGAGGTGGGTTTGAGAGAGAGGGGTGGTAGGATGGGGTT	57190	4514	3552	32	0.1621	0.099	0.0214	0.0033

## Sheet: Gua-dU C9, C10
			Copy number				Frequency [%]
Clickmer	No	SEQUENCE (RANDOM REGION)	C6	C8	C9	C10	C6	C8	C9	C10
G1	99	TTTTGCGAACGCGGGTAGGCGCACCCTTCGCACAAACGTCCC	29974	1697	748147	4890333	0.085	0.0372	7.0335	38.8717
	26	ATTCCGCACGCTCCGGTCGCAGGATGAGGAATCGTAATTTGA	28	3	12030	713237	0.0001	0.0001	0.1131	5.6693
	100	TTTTGCGAACGCGGGTAGGCGCACCCTTCGCACAAACGTTCC	1817	114	63747	449638	0.0051	0.0025	0.5993	3.574
	103	TTTTGCGAACGCGGGTAGGCGCACCCTTTGCACAAACGTCCC	921	53	51427	366321	0.0026	0.0012	0.4835	2.9118
	96	TTTTGCGAACGCGGGTAGGCACACCCTTCGCACAAACGTCCC	1170	70	47768	254587	0.0033	0.0015	0.4491	2.0236
	97	TTTTGCGAACGCGGGTAGGCGCACCCTTCACACAAACGTCCC	719	33	31740	143256	0.002	0.0007	0.2984	1.1387
	108	TTTTGTGAACGCGGGTAGGCGCACCCTTCGCACAAACGTCCC	628	37	24493	141712	0.0018	0.0008	0.2303	1.1264
	94	TTTTGCGAACGCGAGTAGGCGCACCCTTCGCACAAACGTCCC	707	25	29974	120283	0.002	0.0005	0.2818	0.9561
	101	TTTTGCGAACGCGGGTAGGCGCACCCTTCGCACAAATGTCCC	683	22	19588	108968	0.0019	0.0005	0.1841	0.8662
	92	TTTTGCAAACGCGGGTAGGCGCACCCTTCGCACAAACGTCCC	784	27	31641	102433	0.0022	0.0006	0.2975	0.8142
	98	TTTTGCGAACGCGGGTAGGCGCACCCTTCGCACAAACATCCC	670	26	17948	96617	0.0019	0.0006	0.1687	0.768
	102	TTTTGCGAACGCGGGTAGGCGCACCCTTCGCATAAACGTCCC	418	36	12739	81551	0.0012	0.0008	0.1198	0.6482
	106	TTTTGCGAACGCGGGTAGGTGCACCCTTCGCACAAACGTCCC	462	16	16692	74311	0.0013	0.0004	0.1569	0.5907
	107	TTTTGCGAATGCGGGTAGGCGCACCCTTCGCACAAACGTCCC	515	21	19046	64183	0.0015	0.0005	0.1791	0.5102
	105	TTTTGCGAACGCGGGTAGGCGCACTCTTCGCACAAACGTCCC	471	23	19100	63852	0.0013	0.0005	0.1796	0.5075
	95	TTTTGCGAACGCGGATAGGCGCACCCTTCGCACAAACGTCCC	401	16	17900	62613	0.0011	0.0004	0.1683	0.4977
	104	TTTTGCGAACGCGGGTAGGCGCACCTTTCGCACAAACGTCCC	295	14	12585	46567	0.0008	0.0003	0.1183	0.3701
	93	TTTTGCGAACGCAGGTAGGCGCACCCTTCGCACAAACGTCCC	244	12	10249	37755	0.0007	0.0003	0.0964	0.3001
	1	ACTCGCTTACGCACCGGTCGCAGGTTAAGCGATAAGGACTTC	531	162	16317	33448	0.0015	0.0036	0.1534	0.2659
P2	65	GGGTCATGCCGGGTTGGAGTTTAAGGGGTTGGGGCAGGACCC	11442129	992384	828135	19421	32.4287	21.7727	7.7854	0.1544
	2	ACTCGCTTACGCACCGGTCGCAGGTTAAGCGATAAGGATTTC	9238	634	18353	13757	0.0262	0.0139	0.1725	0.1093
	21	AGGGGCGCTTTGGGGGAAATATGGGAGGTGGGGGGGGTCCCG	113071	49772	171698	13707	0.3205	1.092	1.6142	0.109
	17	AGGGGCACTTTGGGGGAAATATGGGAGGTGGGGGGGGTCCCG	35052	26792	113227	11803	0.0993	0.5878	1.0645	0.0938
	27	CCCCCCCCCCCCCCCCCCCCCCCCCCCCCCCCCCCCCCCCCG	228884	55911	79009	4387	0.6487	1.2267	0.7428	0.0349
	89	TGGCGATTATGGGGAGATGGGTGGTGGGGCAGGTCCCGACA	374001	81121	118218	4148	1.06	1.7798	1.1114	0.033
	88	TGGCGATTATGGGGAAATGGGTGGTGGGGCAGGTCCCGACA	215960	37501	75075	3535	0.6121	0.8228	0.7058	0.0281
	46	GGATGGCGATTATGGGGAGATGGGTGGTGGGGCAGGTCCCG	291732	57866	87356	3074	0.8268	1.2696	0.8212	0.0244
	86	TGGCGACTATGGGGAAATGGGTGGTGGGGCAGGTCCCGACA	390019	41680	67319	3021	1.1054	0.9145	0.6329	0.024
	7	AGGGACGCTTTGGGGGAAATATGGGAGGTGGGGGGGGTCCCG	33852	17062	42271	2689	0.0959	0.3743	0.3974	0.0214
	45	GGATGGCGATTATGGGGAAATGGGTGGTGGGGCAGGTCCCG	164989	25907	54272	2542	0.4676	0.5684	0.5102	0.0202
	91	TGGCGGTTATGGGGAGATGGGTGGTGGGGCAGGTCCCGACA	421282	77601	91303	2422	1.194	1.7026	0.8584	0.0193
	81	TGGCAATTATGGGGAGATGGGTGGTGGGGCAGGTCCCGACA	142412	29830	57848	2368	0.4036	0.6545	0.5438	0.0188
	19	AGGGGCGCTTTGGGGGAAATATGGGAGGTGGGGGAGGTCCCG	9764	5722	23230	2119	0.0277	0.1255	0.2184	0.0168
	61	GGGTCATGCCGGGTTGGAGTTTAAGGGGTTGGGACAGGACCC	592429	47654	66936	2107	1.679	1.0455	0.6293	0.0167
	63	GGGTCATGCCGGGTTGGAGTTTAAGGGGTTGGGGCAGAACCC	857328	61805	74183	2051	2.4298	1.356	0.6974	0.0163
	43	GGATGGCGACTATGGGGAAATGGGTGGTGGGGCAGGTCCCG	291068	28499	47522	2029	0.8249	0.6253	0.4468	0.0161
	48	GGATGGCGGTTATGGGGAGATGGGTGGTGGGGCAGGTCCCG	331776	58080	68092	1874	0.9403	1.2743	0.6401	0.0149
	90	TGGCGGTTATGGGGAAATGGGTGGTGGGGCAGGTCCCGACA	175848	29029	49460	1877	0.4984	0.6369	0.465	0.0149
	3	AGGGACACTTTGGGGGAAATATGGGAGGTGGGGGGGGTCCCG	8057	6161	20888	1796	0.0228	0.1352	0.1964	0.0143
	62	GGGTCATGCCGGGTTGGAGTTTAAGGGGTTGGGGCAAGACCC	775947	65556	66839	1803	2.1991	1.4383	0.6284	0.0143
	73	GGGTCATGTCGGGTTGGAGTTTAAGGGGTTGGGGCAGGACCC	396670	33513	54910	1791	1.1242	0.7353	0.5162	0.0142
	14	AGGGGACACTTTGGGGGACTATGGGAGGTGGGGGGAGACCCG	118178	23370	35393	1780	0.3349	0.5127	0.3327	0.0141
	38	GGATGGCAATTATGGGGAGATGGGTGGTGGGGCAGGTCCCG	110608	21336	42756	1779	0.3135	0.4681	0.402	0.0141
	80	TGGCAATTATGGGGAAATGGGTGGTGGGGCAGGTCCCGACA	67559	11177	31720	1683	0.1915	0.2452	0.2982	0.0134
	11	AGGGACGCTTTGGGGGGAATGTGGGAGGTGGGGGGGGTCCCG	136099	31151	51505	1660	0.3857	0.6834	0.4842	0.0132
	85	TGGCGAATATGGGGAGATGGGTGGTGGGGCAGGTCCCGACA	87235	20098	36444	1516	0.2472	0.4409	0.3426	0.0121
	8	AGGGACGCTTTGGGGGAAATGTGGGAGGTGGGGGGGGTCCCG	46960	16008	33656	1459	0.1331	0.3512	0.3164	0.0116
	84	TGGCGAATATGGGGAAATGGGTGGTGGGGCAGGTCCCGACA	47420	9839	25360	1429	0.1344	0.2159	0.2384	0.0114
	47	GGATGGCGGTTATGGGGAAATGGGTGGTGGGGCAGGTCCCG	136672	20838	35802	1407	0.3873	0.4572	0.3366	0.0112
	18	AGGGGCACTTTGGGGGGAATATGGGAGGTGGGGGGGGTCCCG	10907	5060	16178	1344	0.0309	0.111	0.1521	0.0107
	71	GGGTCATGCCGGGTTGGAGTTTAAGGGGTTGGGGTAGGACCC	303734	21076	38581	1234	0.8608	0.4624	0.3627	0.0098
	83	TGGCAGTTATGGGGAGATGGGTGGTGGGGCAGGTCCCGACA	112056	26012	35816	1230	0.3176	0.5707	0.3367	0.0098
	77	TGAACGGGAGGGTGGGAGGTTGCGGGTATGAGGGGCCCGTTG	91872	48961	42114	1214	0.2604	1.0742	0.3959	0.0096
	37	GGATGGCAATTATGGGGAAATGGGTGGTGGGGCAGGTCCCG	50678	7742	22744	1133	0.1436	0.1699	0.2138	0.009
	16	AGGGGCACTTTGGGGGAAATATGGGAGGTGGGGGGGGCCCCG	31526	12121	20720	1104	0.0893	0.2659	0.1948	0.0088
	52	GGGTCATGCCGAGTTGGAGTTTAAGGGGTTGGGGCAGGACCC	176993	10915	31114	1089	0.5016	0.2395	0.2925	0.0087
	57	GGGTCATGCCGGGTTGGAGTTTAAGAGGTTGGGGCAGGACCC	317536	47343	43548	1072	0.8999	1.0387	0.4094	0.0085
	36	GGATCATGCCGGGTTGGAGTTTAAGGGGTTGGGGCAGGACCC	418400	28546	39015	1059	1.1858	0.6263	0.3668	0.0084
	42	GGATGGCGAATATGGGGAGATGGGTGGTGGGGCAGGTCCCG	63645	13257	25251	1062	0.1804	0.2909	0.2374	0.0084
	12	AGGGACGCTTTGGGGGGAATTTGGGAGGTGGGGGGGGTCCCG	19494	17626	27469	1037	0.0552	0.3867	0.2582	0.0082
	41	GGATGGCGAATATGGGGAAATGGGTGGTGGGGCAGGTCCCG	33815	6341	16926	960	0.0958	0.1391	0.1591	0.0076
	40	GGATGGCAGTTATGGGGAGATGGGTGGTGGGGCAGGTCCCG	88250	19140	26717	899	0.2501	0.4199	0.2512	0.0071
	59	GGGTCATGCCGGGTTGGAGTTTAAGGGATTGGGGCAGGACCC	157018	11438	27529	897	0.445	0.2509	0.2588	0.0071
	58	GGGTCATGCCGGGTTGGAGTTTAAGGAGTTGGGGCAGGACCC	145739	8621	25655	874	0.413	0.1891	0.2412	0.0069
	53	GGGTCATGCCGGATTGGAGTTTAAGGGGTTGGGGCAGGACCC	161981	11880	29293	843	0.4591	0.2606	0.2754	0.0067
	22	AGGGGCGCTTTGGGGGAAATATGGGAGGTGGGGGGGTCCCGA	12665	4883	13304	832	0.0359	0.1071	0.1251	0.0066
	49	GGGCCATGCCGGGTTGGAGTTTAAGGGGTTGGGGCAGGACCC	307246	27004	28358	767	0.8708	0.5925	0.2666	0.0061
	23	AGGGGCGCTTTGGGGGGAATATGGGAGGTGGGGGGGGTCCCG	19844	4683	11650	726	0.0562	0.1027	0.1095	0.0058
	29	CCCCCCCCCCCCCCCCCCCCCCCCCCCCCCCCCCCGCCCCCG	21620	6735	12496	694	0.0613	0.1478	0.1175	0.0055
	55	GGGTCATGCCGGGTTGGAATTTAAGGGGTTGGGGCAGGACCC	163734	9283	22667	692	0.464	0.2037	0.2131	0.0055
	54	GGGTCATGCCGGGTTGAAGTTTAAGGGGTTGGGGCAGGACCC	102438	5161	18776	606	0.2903	0.1132	0.1765	0.0048
	28	CCCCCCCCCCCCCCCCCCCCCCCCCCCCCCCCCCCCCTCCCG	20479	6211	9588	588	0.058	0.1363	0.0901	0.0047
	33	GCGGTACGGTTTGACCGTCCGAAGAGCTTCAAGCGATTGAGG	112965	16623	17008	594	0.3202	0.3647	0.1599	0.0047
	51	GGGTCATACCGGGTTGGAGTTTAAGGGGTTGGGGCAGGACCC	119125	6391	17250	556	0.3376	0.1402	0.1622	0.0044
	82	TGGCAGTTATGGGGAAATGGGTGGTGGGGCAGGTCCCGACA	27914	6363	13229	554	0.0791	0.1396	0.1244	0.0044
	5	AGGGACACTTTGGGGGGAATGTGGGAGGTGGGGGGGGTCCCG	40290	10190	16684	544	0.1142	0.2236	0.1568	0.0043
	32	GAGTCATGCCGGGTTGGAGTTTAAGGGGTTGGGGCAGGACCC	201664	12048	19300	525	0.5715	0.2643	0.1814	0.0042
	67	GGGTCATGCCGGGTTGGAGTTTAAGGGGTTGGGGCAGGACTC	214734	12778	17614	511	0.6086	0.2803	0.1656	0.0041
	6	AGGGACGCTTTGGGGGAAATATGGGAGGTGGGGGGGGCCCCG	63011	11398	12919	493	0.1786	0.2501	0.1215	0.0039
	10	AGGGACGCTTTGGGGGGAATATGGGAGGTGGGGGGGGTCCCG	11556	4654	9765	490	0.0328	0.1021	0.0918	0.0039
	30	CGGACGGGAGGGTGGGTTGGGTGGGTCTTACAAGGGGCCAGG	41960	19304	16988	468	0.1189	0.4235	0.1597	0.0037
	9	AGGGACGCTTTGGGGGAAATTTGGGAGGTGGGGGGGGTCCCG	4187	4740	9514	458	0.0119	0.104	0.0894	0.0036
	39	GGATGGCAGTTATGGGGAAATGGGTGGTGGGGCAGGTCCCG	21563	4513	9592	449	0.0611	0.099	0.0902	0.0036
	78	TGGCAACTATGGGGAAATGGGTGGTGGGGCAGGTCCCGACA	48735	4031	9421	446	0.1381	0.0884	0.0886	0.0035
	20	AGGGGCGCTTTGGGGGAAATATGGGAGGTGGGGGGGGCCCCG	43943	6621	9784	428	0.1245	0.1453	0.092	0.0034
	31	GAGGGTAGGGTGGGTGGGATATATAGGGGCCCTCAGGGTCCG	31167	11751	12886	426	0.0883	0.2578	0.1211	0.0034
	70	GGGTCATGCCGGGTTGGAGTTTAAGGGGTTGGGGCATGACCC	139629	15582	13201	423	0.3957	0.3419	0.1241	0.0034
	72	GGGTCATGCTGGGTTGGAGTTTAAGGGGTTGGGGCAGGACCC	146587	8539	16651	428	0.4154	0.1873	0.1565	0.0034
	66	GGGTCATGCCGGGTTGGAGTTTAAGGGGTTGGGGCAGGACCT	137888	10822	13796	407	0.3908	0.2374	0.1297	0.0032
	34	GCGGTACGGTTTGACCGTCCGAAGAGCTTTAAGCGATTGAGG	25710	11343	10731	385	0.0729	0.2489	0.1009	0.0031
	4	AGGGACACTTTGGGGGAAATGTGGGAGGTGGGGGGGGTCCCG	14495	4992	9557	374	0.0411	0.1095	0.0898	0.003
	76	TGAACGGGAGGGTGGGAGGTTGCGGGTATAAGGGGCCCGTTG	79083	12547	11261	373	0.2241	0.2753	0.1059	0.003
	15	AGGGGACACTTTGGGGGGTTATGGGAGGTGGGGGGAGACCCG	38881	6180	7530	335	0.1102	0.1356	0.0708	0.0027
	68	GGGTCATGCCGGGTTGGAGTTTAAGGGGTTGGGGCAGGATCC	116944	7508	10598	341	0.3314	0.1647	0.0996	0.0027
	60	GGGTCATGCCGGGTTGGAGTTTAAGGGGTTGGAGCAGGACCC	102997	5992	10449	312	0.2919	0.1315	0.0982	0.0025
	24	AGGGTTAAATGGGGGAAATTGGGTGGTGGGGGAGGGGGCACG	154495	6353	7531	274	0.4379	0.1394	0.0708	0.0022
	25	AGGTCATGCCGGGTTGGAGTTTAAGGGGTTGGGGCAGGACCC	125267	10007	11090	277	0.355	0.2196	0.1043	0.0022
	35	GGACGGGCAAGATGGCTTCGGGGCTTGGGCGTTTTAAGGGGA	40372	19498	11732	279	0.1144	0.4278	0.1103	0.0022
	79	TGGCAACTATGGGGAGATGGGTGGTGGGGCAGGTCCCGACA	53818	4818	6967	277	0.1525	0.1057	0.0655	0.0022
	87	TGGCGACTATGGGGAGATGGGTGGTGGGGCAGGTCCCGACA	134181	8491	9368	277	0.3803	0.1863	0.0881	0.0022
	13	AGGGCGAGGTGGCAAAGTCTTGGGGAGAATTGGGTGGTGGGG	24107	12997	13049	240	0.0683	0.2852	0.1227	0.0019
	56	GGGTCATGCCGGGTTGGAGTTTAAGAGGTTGGGGCAGAACCC	41926	6222	7564	221	0.1188	0.1365	0.0711	0.0018
	69	GGGTCATGCCGGGTTGGAGTTTAAGGGGTTGGGGCAGTACCC	46275	4663	6014	231	0.1312	0.1023	0.0565	0.0018
	64	GGGTCATGCCGGGTTGGAGTTTAAGGGGTTGGGGCAGGACCA	67368	6335	6971	219	0.1909	0.139	0.0655	0.0017
	74	GGTCATGCCGGGTTGGAGTTTAAGGGGTTGGGGCAGGACCCA	96367	9545	8320	196	0.2731	0.2094	0.0782	0.0016
	44	GGATGGCGACTATGGGGAGATGGGTGGTGGGGCAGGTCCCG	103011	6005	6738	186	0.2919	0.1317	0.0633	0.0015
	75	GGTGGAGGTGGGTTTGAGAGAGAGGGGTGGTAGGATGGGGTT	57190	4514	3515	79	0.1621	0.099	0.033	0.0006
	50	GGGTAGGGTGGGATGGGTTTTAGGGGAGGAGGAGGGGCCCCG	54018	5002	2769	55	0.1531	0.1097	0.026	0.0004
